# Supplementary material for: Global, regional, and national estimates of target population sizes for covid-19 vaccination: descriptive study
Source: PubMed Central journal article supplement — BMJ. 2020 Dec 15;371:m4704. doi: 10.1136/bmj.m4704 (PMC7736995; doi:10.1136/bmj.m4704), 2020-12-15
Supplement: wanw062749.ww.pdf [file wanw062749.ww.pdf]

# Global, regional, and national estimates of target population sizes for covid-19 vaccination: descriptive study

## Appendix

Wei Wang, doctoral candidate<sup>1</sup>, Qianhui Wu, doctoral candidate<sup>1</sup>, Juan Yang, associate researcher<sup>1</sup>, Kaige Dong, masters student<sup>1</sup>, Xinghui Chen, masters student<sup>1</sup>, Xufang Bai, masters student<sup>1</sup>, Xinhua Chen, masters student<sup>1</sup>, Zhiyuan Chen, masters student<sup>1</sup>, Cécile Viboud, senior staff scientist<sup>2†</sup>, Marco Ajelli, associate professor<sup>3,4†</sup>, Hongjie Yu(<http://orcid.org/0000-0002-6335-5648>), professor<sup>1†</sup>

### Author Affiliations:

1. School of Public Health, Fudan University, Key Laboratory of Public Health Safety, Ministry of Education, Shanghai, China (W. Wang, Q. Wu, J. Yang, K. Dong, X. Chen, X. Bai, X. Chen, Z. Chen, H. Yu)
2. Division of International Epidemiology and Population Studies, Fogarty International Center, National Institutes of Health, Bethesda, MD, USA (C. Viboud)
3. Department of Epidemiology and Biostatistics, Indiana University School of Public Health, Bloomington, IN, USA (M. Ajelli)
4. Laboratory for the Modeling of Biological and Socio-technical Systems, Northeastern University, Boston, MA USA (M. Ajelli)

† These authors are joint senior authors and contributed equally to this work.

### Corresponding Authors:

Hongjie Yu, PhD, School of Public Health, Fudan University, Key Laboratory of Public Health Safety, Ministry of Education, No. 138 Yixueyuan Road, Xuhui District, 200032, Shanghai, China ([yhj@fudan.edu.cn](mailto:yhj@fudan.edu.cn))

## Table of content

|                                                                                                                                                                                                                                                                                               |    |
|-----------------------------------------------------------------------------------------------------------------------------------------------------------------------------------------------------------------------------------------------------------------------------------------------|----|
| Table. S1. List of data source by population group.....                                                                                                                                                                                                                                       | 5  |
| Table. S2. Completeness analysis of data that included in this study.....                                                                                                                                                                                                                     | 22 |
| Table. S3. Observed number of persons for different target populations for COVID-19 vaccination.....                                                                                                                                                                                          | 24 |
| Table. S4. Estimates of target population sizes for COVID-19 vaccination on a national scale, using multiple imputation procedure and bootstrap method for missing data on the number of essential workers who ensure basic life needs. ....                                                  | 32 |
| Table. S5. Estimates of target population sizes for COVID-19 vaccination in 194 countries, considering the fraction of the population willing to accept COVID-19 vaccination in each WHO region.....                                                                                          | 40 |
| Table. S6. The estimates of target population sizes for COVID-19 vaccination by goals of vaccination program on a national level, assuming 0% of total people with underlying conditions in 11 countries without available data on the age-specific prevalence of underlying conditions. .... | 41 |
| Table. S7. National estimates of target population sizes for COVID-19 vaccination in 104 countries with data on each target population from official reports.....                                                                                                                             | 42 |
| Table. S8. National estimates of target population sizes for COVID-19 vaccination among those who are willing to accept COVID-19 vaccination..                                                                                                                                                | 47 |
| Table. S9. Vaccine capacity of phase III COVID-19 candidate vaccines as announced by their manufacturers. ....                                                                                                                                                                                | 52 |
| Table. S10. Summary of the inclusion and exclusion criteria for clinical trials of COVID-19 vaccine, regarding measurement of pre-existing antibody in clinical trials. ....                                                                                                                  | 54 |
| Figure. S1. Global and regional estimates of potential acceptance of a COVID-19 vaccine.....                                                                                                                                                                                                  | 57 |
| Figure. S2. Age distribution of target populations for COVID-19 vaccination program across regions, by goals of vaccination program. ....                                                                                                                                                     | 58 |
| Figure. S3. National estimates of the size of each target population for                                                                                                                                                                                                                      |    |

|                                                                                                                                                                                                                                    |    |
|------------------------------------------------------------------------------------------------------------------------------------------------------------------------------------------------------------------------------------|----|
| COVID-19 vaccination in Africa, Americas and Western Pacific regions, by goals of vaccination program.....                                                                                                                         | 59 |
| Figure. S4. National estimates of the size of each target population for COVID-19 vaccination in Europe, Eastern Mediterranean and South-East Asia regions, by goals of vaccination program.....                                   | 60 |
| Figure. S5. Proportion of each target population for COVID-19 vaccination in Africa, Americas and Western Pacific regions.....                                                                                                     | 61 |
| Figure. S6. Proportion of each target population for COVID-19 vaccination in Europe, Eastern Mediterranean and South–East Asia regions.....                                                                                        | 62 |
| Figure. S7. The size of essential workers in 104 countries data on each target population from official statistics. ....                                                                                                           | 63 |
| Figure. S8. The size of target population to reduce severe COVID-19 disease, to reduce symptomatic infections and/or to stop virus transmission in 104 countries with data on each target population from official statistics..... | 64 |
| References.....                                                                                                                                                                                                                    | 66 |

**Table. S1. List of data source by population group**

| Population group              | Country or territory   | Year | Proportion of population affected by data source (%) | Data source                                       | Link                                                                                                                                                                                                                                                                        |
|-------------------------------|------------------------|------|------------------------------------------------------|---------------------------------------------------|-----------------------------------------------------------------------------------------------------------------------------------------------------------------------------------------------------------------------------------------------------------------------------|
| Total                         | All                    | 2020 | -                                                    | WorldPop                                          | <a href="https://www.worldpop.org/geodata/listing?id=30">https://www.worldpop.org/geodata/listing?id=30</a>                                                                                                                                                                 |
| Armed forces                  | All                    | 2017 | -                                                    | World bank                                        | <a href="https://data.worldbank.org/indicator/MS.MIL.TOTL.P1">https://data.worldbank.org/indicator/MS.MIL.TOTL.P1</a>                                                                                                                                                       |
| Police officers               |                        |      |                                                      |                                                   |                                                                                                                                                                                                                                                                             |
| From official reports (n=100) | Afghanistan            | 2013 | 0.40                                                 | International Aid Agency Oxfam                    | <a href="https://news.yahoo.com/another-female-police-officer-shot-afghanistan-062545180.html">https://news.yahoo.com/another-female-police-officer-shot-afghanistan-062545180.html</a>                                                                                     |
|                               | Albania                | 2013 | 0.35                                                 | Ministry of Internal Affairs, Republic of Albania | <a href="https://www.punetebrendshme.gov.al/2013/12/15/rriten-pagat-per-93-te-punonjesve-te-policise-se-shtetit/">https://www.punetebrendshme.gov.al/2013/12/15/rriten-pagat-per-93-te-punonjesve-te-policise-se-shtetit/</a>                                               |
|                               | Algeria                | 2007 | 0.30                                                 | Algeria General Directorate of National Security  | <a href="http://lcweb2.loc.gov/frd/cs/profiles/Algeria.pdf">http://lcweb2.loc.gov/frd/cs/profiles/Algeria.pdf</a>                                                                                                                                                           |
|                               | Antigua and Barbuda    | 2020 | 1.02                                                 | International Criminal Police Organization        | <a href="https://www.interpol.int/Who-we-are/Member-countries/Americas/ANTIGUA-BARBUDA">https://www.interpol.int/Who-we-are/Member-countries/Americas/ANTIGUA-BARBUDA</a>                                                                                                   |
|                               | Argentina              | 2015 | 0.77                                                 | InSight Crime                                     | <a href="https://www.insightcrime.org/argentina-organized-crime-news/argentina-profile/">https://www.insightcrime.org/argentina-organized-crime-news/argentina-profile/</a>                                                                                                 |
|                               | Australia              | 2017 | 0.22                                                 | Australia Government, Productivity Commission     | <a href="https://www.pc.gov.au/research/ongoing/report-on-government-services/2018/justice/police-services/rogs-2018-partc-chapter6.pdf">https://www.pc.gov.au/research/ongoing/report-on-government-services/2018/justice/police-services/rogs-2018-partc-chapter6.pdf</a> |
|                               | Austria                | 2016 | 0.32                                                 | European Union                                    | <a href="https://ec.europa.eu/eurostat/web/products-eurostat-news/-/DDN-20190104-1">https://ec.europa.eu/eurostat/web/products-eurostat-news/-/DDN-20190104-1</a>                                                                                                           |
|                               | Barbados               | 2013 | 0.70                                                 | ROYAL BARBADOS POLICE FORCE                       | <a href="https://www.barbadosparliament.com/uploads/sittings/attachments/c5fee634002ca489f1cd9a9257504cbd.pdf">https://www.barbadosparliament.com/uploads/sittings/attachments/c5fee634002ca489f1cd9a9257504cbd.pdf</a>                                                     |
|                               | Belarus                | 2010 | 0.33                                                 | United Nations                                    | <a href="http://www.unodc.org/documents/data-and-analysis/Crime-statistics/International_Statistics_on_Crime_and_Justice.pdf">http://www.unodc.org/documents/data-and-analysis/Crime-statistics/International_Statistics_on_Crime_and_Justice.pdf</a>                       |
|                               | Belgium                | 2017 | 0.33                                                 | EuroCOP                                           | <a href="https://web.archive.org/web/20181130113157/https://vsoa-pol.be/nl_NL/niet-meer-maar-minder-politiemensen-tov-buurlanden/">https://web.archive.org/web/20181130113157/https://vsoa-pol.be/nl_NL/niet-meer-maar-minder-politiemensen-tov-buurlanden/</a>             |
|                               | Belize                 | 2020 | 0.25                                                 | International Criminal Police Organization        | <a href="https://www.interpol.int/Who-we-are/Member-countries/Americas/BELIZE">https://www.interpol.int/Who-we-are/Member-countries/Americas/BELIZE</a>                                                                                                                     |
|                               | Bolivia                | 2015 | 0.27                                                 | International Security Sector Advisory Team       | <a href="https://issat.dcaf.ch/mkd/Learn/Resource-Library/Country-Profiles/Bolivia-Country-Profile">https://issat.dcaf.ch/mkd/Learn/Resource-Library/Country-Profiles/Bolivia-Country-Profile</a>                                                                           |
|                               | Bosnia and Herzegovina | 2015 | 0.52                                                 | Belgrade Centre for Security Policy               | <a href="https://pointpulse.net/magazine/policing-in-bosnia-and-herzegovina/#_ftn1">https://pointpulse.net/magazine/policing-in-bosnia-and-herzegovina/#_ftn1</a>                                                                                                           |

|  |                          |      |      |                                             |                                                                                                                                                                                                                             |
|--|--------------------------|------|------|---------------------------------------------|-----------------------------------------------------------------------------------------------------------------------------------------------------------------------------------------------------------------------------|
|  | Botswana                 | 2020 | 0.43 | International Criminal Police Organization  | <a href="https://www.interpol.int/Who-we-are/Member-countries/Africa/BOTSWANA">https://www.interpol.int/Who-we-are/Member-countries/Africa/BOTSWANA</a>                                                                     |
|  | Brazil                   | 2014 | 0.15 | International Security Sector Advisory Team | <a href="https://issat.dcaf.ch/mkd/Learn/Resource-Library/Country-Profiles/Brazil-Country-Profile">https://issat.dcaf.ch/mkd/Learn/Resource-Library/Country-Profiles/Brazil-Country-Profile</a>                             |
|  | Brunei                   | 2020 | 0.92 | International Criminal Police Organization  | <a href="https://www.interpol.int/Who-we-are/Member-countries/Asia-South-Pacific/BRUNEI">https://www.interpol.int/Who-we-are/Member-countries/Asia-South-Pacific/BRUNEI</a>                                                 |
|  | Bulgaria                 | 2015 | 0.35 | European Union                              | <a href="https://ec.europa.eu/eurostat/data/database">https://ec.europa.eu/eurostat/data/database</a>                                                                                                                       |
|  | Burkina Faso             | 2020 | 0.12 | International Security Sector Advisory Team | <a href="https://issat.dcaf.ch/mkd/Learn/Resource-Library/Country-Profiles/Burkina-Faso-Country-Background-Note">https://issat.dcaf.ch/mkd/Learn/Resource-Library/Country-Profiles/Burkina-Faso-Country-Background-Note</a> |
|  | Burundi                  | 2004 | 0.15 | International Security Sector Advisory Team | <a href="https://issat.dcaf.ch/mkd/Learn/Resource-Library/Country-Profiles/Burundi-SSR-Background-Note#16">https://issat.dcaf.ch/mkd/Learn/Resource-Library/Country-Profiles/Burundi-SSR-Background-Note#16</a>             |
|  | Cambodia                 | 1999 | 0.38 | Human Rights Watch                          | <a href="https://www.hrw.org/reports/1999/cambo2/Cambo996-02.htm">https://www.hrw.org/reports/1999/cambo2/Cambo996-02.htm</a>                                                                                               |
|  | Canada                   | 2017 | 0.18 | Symbol of Statistics Canada                 | <a href="https://www150.statcan.gc.ca/n1/pub/85-002-x/2018001/article/54912/tbl/tbl02-eng.htm">https://www150.statcan.gc.ca/n1/pub/85-002-x/2018001/article/54912/tbl/tbl02-eng.htm</a>                                     |
|  | Central African Republic | 2019 | 0.08 | United Nations                              | <a href="https://reliefweb.int/sites/reliefweb.int/files/resources/S_2019_498_E.pdf">https://reliefweb.int/sites/reliefweb.int/files/resources/S_2019_498_E.pdf</a>                                                         |
|  | Chile                    | 2015 | 0.34 | International Security Sector Advisory Team | <a href="https://issat.dcaf.ch/Learn/Resource-Library2/Country-Profiles/Chile-Country-Profile">https://issat.dcaf.ch/Learn/Resource-Library2/Country-Profiles/Chile-Country-Profile</a>                                     |
|  | China                    | 2018 | 0.14 | International Criminal Police Organization  | <a href="https://www.interpol.int/en/Who-we-are/Member-countries/Asia-South-Pacific/CHINA">https://www.interpol.int/en/Who-we-are/Member-countries/Asia-South-Pacific/CHINA</a>                                             |
|  | Colombia                 | 2020 | 0.31 | National Police of Colombia                 | <a href="https://inpublicsafety.com/2020/04/museum-provides-unique-insights-into-national-police-of-colombia/">https://inpublicsafety.com/2020/04/museum-provides-unique-insights-into-national-police-of-colombia/</a>     |
|  | Costa Rica               | 2015 | 0.10 | International Security Sector Advisory Team | <a href="https://issat.dcaf.ch/Learn/Resource-Library2/Country-Profiles/Costa-Rica-Country-Profile">https://issat.dcaf.ch/Learn/Resource-Library2/Country-Profiles/Costa-Rica-Country-Profile</a>                           |
|  | Cyprus                   | 2016 | 0.58 | European Union                              | <a href="https://ec.europa.eu/eurostat/web/products-eurostat-news/-/DDN-20190104-1">https://ec.europa.eu/eurostat/web/products-eurostat-news/-/DDN-20190104-1</a>                                                           |
|  | Czech Republic           | 2016 | 0.38 | European Union                              | <a href="https://ec.europa.eu/eurostat/web/products-eurostat-news/-/DDN-20190104-1">https://ec.europa.eu/eurostat/web/products-eurostat-news/-/DDN-20190104-1</a>                                                           |
|  | Denmark                  | 2017 | 0.19 | Danish national police                      | <a href="https://web.archive.org/web/20181119214341/https://www.politi.dk/en/About_the_police/organisation/">https://web.archive.org/web/20181119214341/https://www.politi.dk/en/About_the_police/organisation/</a>         |
|  | Dominican Republic       | 2020 | 0.29 | Policia Nacional Dominicana                 | <a href="https://www.interpol.int/Who-we-are/Member-countries/Americas/DOMINICAN-REPUBLIC">https://www.interpol.int/Who-we-are/Member-countries/Americas/DOMINICAN-REPUBLIC</a>                                             |
|  | Ecuador                  | 2015 | 0.24 | International Security Sector Advisory Team | <a href="https://issat.dcaf.ch/mkd/Learn/Resource-Library/Country-Profiles/Ecuador-Country-Profile">https://issat.dcaf.ch/mkd/Learn/Resource-Library/Country-Profiles/Ecuador-Country-Profile</a>                           |
|  | Estonia                  | 2020 | 0.30 | Federal Statistical Office of Germany       | <a href="https://www.destatis.de/DE/Themen/Staat/Oeffentlicher-Dienst/Tabellen/beschaefigten-polizei.html">https://www.destatis.de/DE/Themen/Staat/Oeffentlicher-Dienst/Tabellen/beschaefigten-polizei.html</a>             |

|  |           |      |      |                                                   |                                                                                                                                                                                                                                                                                                                                                   |
|--|-----------|------|------|---------------------------------------------------|---------------------------------------------------------------------------------------------------------------------------------------------------------------------------------------------------------------------------------------------------------------------------------------------------------------------------------------------------|
|  | Ethiopia  | 2019 | 0.03 | Independent Advisory Group on Country Information | <a href="https://assets.publishing.service.gov.uk/government/uploads/system/uploads/attachment_data/file/849804/Ethiopia_-_Background_Note_-_v1.0_November_2019_GOV.UK.pdf">https://assets.publishing.service.gov.uk/government/uploads/system/uploads/attachment_data/file/849804/Ethiopia_-_Background_Note_-_v1.0_November_2019_GOV.UK.pdf</a> |
|  | Fiji      | 2017 | 0.45 | STANDING COMMITTEE ON FOREIGN AFFAIRS AND DEFENCE | <a href="http://www.parliament.gov.fj/wp-content/uploads/2019/02/Review-Report-of-the-Fiji-Police-Force-AR-Aug-2016-to-Jul-2017-Final.pdf">http://www.parliament.gov.fj/wp-content/uploads/2019/02/Review-Report-of-the-Fiji-Police-Force-AR-Aug-2016-to-Jul-2017-Final.pdf</a>                                                                   |
|  | Finland   | 2019 | 0.13 | Statista Research Department                      | <a href="https://www.statista.com/statistics/540383/finland-number-of-police-officers/">https://www.statista.com/statistics/540383/finland-number-of-police-officers/</a>                                                                                                                                                                         |
|  | France    | 2019 | 0.26 | European Security&Defence                         | <a href="https://euro-sd.com/2019/12/articles/15555/police-and-paramilitary-forces-in-france/">https://euro-sd.com/2019/12/articles/15555/police-and-paramilitary-forces-in-france/</a>                                                                                                                                                           |
|  | Germany   | 2018 | 0.38 | Federal Statistical Office of Germany             | <a href="https://www.destatis.de/DE/Themen/Staat/Oeffentlicher-Dienst/Tabellen/beschaefigten-polizei.html">https://www.destatis.de/DE/Themen/Staat/Oeffentlicher-Dienst/Tabellen/beschaefigten-polizei.html</a>                                                                                                                                   |
|  | Greece    | 2016 | 0.53 | European Union                                    | <a href="https://ec.europa.eu/eurostat/web/products-eurostat-news/-/DDN-20190104-1">https://ec.europa.eu/eurostat/web/products-eurostat-news/-/DDN-20190104-1</a>                                                                                                                                                                                 |
|  | Grenada   | 2020 | 0.88 | Royal Grenada Police Force                        | <a href="https://web.archive.org/web/20131203023819/http://www.rgpf.gd/index.php?option=com_content&amp;view=category&amp;id=1&amp;Itemid=3">https://web.archive.org/web/20131203023819/http://www.rgpf.gd/index.php?option=com_content&amp;view=category&amp;id=1&amp;Itemid=3</a>                                                               |
|  | Guatemala | 2014 | 0.08 | InSight Crime                                     | <a href="https://www.insightcrime.org/news/analysis/report-puts-guatemala-national-police-under-the-microscope/">https://www.insightcrime.org/news/analysis/report-puts-guatemala-national-police-under-the-microscope/</a>                                                                                                                       |
|  | Guyana    | 2010 | 0.38 | International Security Sector Advisory Team       | <a href="https://issat.dcaf.ch/mkd/Learn/Resource-Library/Country-Profiles/Guyana-Country-Profile">https://issat.dcaf.ch/mkd/Learn/Resource-Library/Country-Profiles/Guyana-Country-Profile</a>                                                                                                                                                   |
|  | Honduras  | 2016 | 0.14 | InSight Crime                                     | <a href="https://www.insightcrime.org/honduras-organized-crime-news/honduras/">https://www.insightcrime.org/honduras-organized-crime-news/honduras/</a>                                                                                                                                                                                           |
|  | Iceland   | 2015 | 0.29 | The National Commissioner of the Icelandic Police | <a href="http://www.logreglan.is/wp-content/uploads/2015/05/The-number-of-Police-officers-and-civilian-staff-in-Iceland-2015.pdf">http://www.logreglan.is/wp-content/uploads/2015/05/The-number-of-Police-officers-and-civilian-staff-in-Iceland-2015.pdf</a>                                                                                     |
|  | India     | 2018 | 0.14 | Ministry of Home Affairs, Govt. of India          | <a href="https://bprd.nic.in/content/62_1_DataonPoliceOrganizations.aspx">https://bprd.nic.in/content/62_1_DataonPoliceOrganizations.aspx</a>                                                                                                                                                                                                     |
|  | Iraq      | 2020 | 0.11 | International Security Sector Advisory Team       | <a href="https://issat.dcaf.ch/mkd/Learn/Resource-Library/Country-Profiles/Iraq-SSR-Country-Background-Note">https://issat.dcaf.ch/mkd/Learn/Resource-Library/Country-Profiles/Iraq-SSR-Country-Background-Note</a>                                                                                                                               |
|  | Ireland   | 2020 | 0.30 | International Criminal Police Organization        | <a href="https://www.interpol.int/Who-we-are/Member-countries/Europe/IRELAND">https://www.interpol.int/Who-we-are/Member-countries/Europe/IRELAND</a>                                                                                                                                                                                             |
|  | Israel    | 2018 | 0.32 | Ministry of Public Security                       | <a href="https://www.police.gov.il/GraphSkifout.aspx?mid=67">https://www.police.gov.il/GraphSkifout.aspx?mid=67</a>                                                                                                                                                                                                                               |
|  | Italy     | 2020 | 0.50 | Italian police                                    | <a href="https://www.understandingitaly.com/italian-police.html">https://www.understandingitaly.com/italian-police.html</a>                                                                                                                                                                                                                       |
|  | Jamaica   | 2015 | 0.37 | International Security Sector Advisory Team       | <a href="https://issat.dcaf.ch/mkd/Learn/Resource-Library/Country-Profiles/Jamaica-Country-Profile">https://issat.dcaf.ch/mkd/Learn/Resource-Library/Country-Profiles/Jamaica-Country-Profile</a>                                                                                                                                                 |
|  | Japan     | 2018 | 0.23 | National Police Agency                            | <a href="https://www.npa.go.jp/english/Police_of_Japan/Police_of_Japan_2018_full_text.pdf">https://www.npa.go.jp/english/Police_of_Japan/Police_of_Japan_2018_full_text.pdf</a>                                                                                                                                                                   |

|  |             |       |      |                                                 |                                                                                                                                                                                                                                                                                                                                                                           |
|--|-------------|-------|------|-------------------------------------------------|---------------------------------------------------------------------------------------------------------------------------------------------------------------------------------------------------------------------------------------------------------------------------------------------------------------------------------------------------------------------------|
|  | Kazakhstan  | 2020  | 0.04 | Interior ministry                               | <a href="https://eurasianet.org/kazakhstan-cuts-police-numbers-turns-to-public-for-help">https://eurasianet.org/kazakhstan-cuts-police-numbers-turns-to-public-for-help</a> ; <a href="https://en.egemen.kz/article/221836-kazakhstan-to-reduce-the-number-of-police-officers">https://en.egemen.kz/article/221836-kazakhstan-to-reduce-the-number-of-police-officers</a> |
|  | Kenya       | 2017  | 0.07 | Kenya government                                | <a href="http://www.capitalfm.co.ke/news/2017/03/kenya-beats-global-police-civilian-ratio/">http://www.capitalfm.co.ke/news/2017/03/kenya-beats-global-police-civilian-ratio/</a> ; <a href="https://www.interpol.int/Who-we-are/Member-countries/Africa/KENYA">https://www.interpol.int/Who-we-are/Member-countries/Africa/KENYA</a>                                     |
|  | Latvia      | 2016  | 0.48 | European Union                                  | <a href="https://ec.europa.eu/eurostat/web/products-eurostat-news/-/DDN-20190104-1">https://ec.europa.eu/eurostat/web/products-eurostat-news/-/DDN-20190104-1</a>                                                                                                                                                                                                         |
|  | Lesotho     | 2012  | 0.09 | Transformation Research Centre, Lesotho         | <a href="https://web.archive.org/web/20130411202822/http://www.iss.co.za/pubs/books/hidden+seek/Lesotho.pdf">https://web.archive.org/web/20130411202822/http://www.iss.co.za/pubs/books/hidden+seek/Lesotho.pdf</a>                                                                                                                                                       |
|  | Libya       | 2005  | 0.15 | Library of Congress – Federal Research Division | <a href="https://www.loc.gov/rr/frd/cs/profiles/Libya-new.pdf">https://www.loc.gov/rr/frd/cs/profiles/Libya-new.pdf</a>                                                                                                                                                                                                                                                   |
|  | Lithuania   | 2016  | 0.29 | European Union                                  | <a href="https://ec.europa.eu/eurostat/web/products-eurostat-news/-/DDN-20190104-1">https://ec.europa.eu/eurostat/web/products-eurostat-news/-/DDN-20190104-1</a>                                                                                                                                                                                                         |
|  | Luxembourg  | 2017  | 0.32 | Internal Security Minister                      | <a href="https://delano.lu/d/detail/news/lux-police-numbers-reach-record-high/157654">https://delano.lu/d/detail/news/lux-police-numbers-reach-record-high/157654</a>                                                                                                                                                                                                     |
|  | Macedonia   | 2017  | 0.58 | Government report                               | <a href="http://www.finance.gov.mk/files/u6/Predlog-Budzet%20na%20RM%20za%202017_0.pdf">http://www.finance.gov.mk/files/u6/Predlog-Budzet%20na%20RM%20za%202017_0.pdf</a>                                                                                                                                                                                                 |
|  | Mali        | 2015  | 0.06 | International Security Sector Advisory Team     | <a href="https://issat.dcaf.ch/mkd/Learn/Resource-Library/Country-Profiles/Mali-SSR-Background-Note">https://issat.dcaf.ch/mkd/Learn/Resource-Library/Country-Profiles/Mali-SSR-Background-Note</a>                                                                                                                                                                       |
|  | Mauritius   | 2013  | 0.94 | Prime Minister’s Office- Mauritius Police Force | <a href="http://prb.pmo.govmu.org/English/Documents/PRB%20Reports/mpf.pdf">http://prb.pmo.govmu.org/English/Documents/PRB%20Reports/mpf.pdf</a>                                                                                                                                                                                                                           |
|  | Mexico      | 2012  | 0.33 | International Security Sector Advisory Team     | <a href="https://issat.dcaf.ch/mkd/Learn/Resource-Library/Country-Profiles/Mexico-Country-Profile">https://issat.dcaf.ch/mkd/Learn/Resource-Library/Country-Profiles/Mexico-Country-Profile</a>                                                                                                                                                                           |
|  | Moldova     | 10500 | 0.05 | Moldovan Ministry of Internal Affairs           | <a href="https://polis.osce.org/country-profiles/moldova">https://polis.osce.org/country-profiles/moldova</a>                                                                                                                                                                                                                                                             |
|  | Montenegro  | 2020  | 0.80 | Ministry of Internal Affairs                    | <a href="https://polis.osce.org/country-profiles/montenegro">https://polis.osce.org/country-profiles/montenegro</a>                                                                                                                                                                                                                                                       |
|  | Morocco     | 2011  | 0.18 | International Security Sector Advisory Team     | <a href="https://issat.dcaf.ch/mkd/Learn/Resource-Library/Country-Profiles/Morocco-SSR-Snapshot">https://issat.dcaf.ch/mkd/Learn/Resource-Library/Country-Profiles/Morocco-SSR-Snapshot</a>                                                                                                                                                                               |
|  | Mozambique  | 2016  | 0.07 | Nuvunga et al, 2016                             | <a href="https://issat.dcaf.ch/mkd/Learn/Resource-Library/Country-Profiles/Mozambique-Background-Note">https://issat.dcaf.ch/mkd/Learn/Resource-Library/Country-Profiles/Mozambique-Background-Note</a>                                                                                                                                                                   |
|  | Netherlands | 2018  | 0.29 | Government of the Netherlands                   | <a href="https://www.rijksoverheid.nl/documenten/jaarverslagen/2019/05/15/nationale-politie-2018">https://www.rijksoverheid.nl/documenten/jaarverslagen/2019/05/15/nationale-politie-2018</a>                                                                                                                                                                             |
|  | Nicaragua   | 2011  | 0.18 | International Security Sector Advisory Team     | <a href="https://issat.dcaf.ch/mkd/Learn/Resource-Library/Country-Profiles/Nicaragua-Country-Profile">https://issat.dcaf.ch/mkd/Learn/Resource-Library/Country-Profiles/Nicaragua-Country-Profile</a>                                                                                                                                                                     |
|  | Nigeria     | 2016  | 0.18 | Nigeria Police Force                            | <a href="https://www.npf.gov.ng/">https://www.npf.gov.ng/</a>                                                                                                                                                                                                                                                                                                             |
|  | Norway      | 2020  | 0.33 | Norwegian police                                | <a href="https://www.politiet.no/en/aktuelt-tall-og-fakta/tall-og-fakta/bemanning/">https://www.politiet.no/en/aktuelt-tall-og-fakta/tall-og-fakta/bemanning/</a>                                                                                                                                                                                                         |



|  |                                  |      |      |                                             |                                                                                                                                                                                                                                                                                                                                           |
|--|----------------------------------|------|------|---------------------------------------------|-------------------------------------------------------------------------------------------------------------------------------------------------------------------------------------------------------------------------------------------------------------------------------------------------------------------------------------------|
|  | Niue                             | 2009 | 0.93 | Parliament of Australia                     | <a href="https://www.aph.gov.au/Parliamentary_Business/Committees/Senate/Foreign%20Affairs%20Defence%20and%20Trade/Completed%20inquiries/2008-10/swpacific/report2/c03">https://www.aph.gov.au/Parliamentary_Business/Committees/Senate/Foreign%20Affairs%20Defence%20and%20Trade/Completed%20inquiries/2008-10/swpacific/report2/c03</a> |
|  | Pakistan                         | 2011 | 0.16 | United States Institute of Peace            | <a href="https://www.usip.org/sites/default/files/SR266-Reforming_Pakistan%E2%80%98s_Police_and_Law_Enforcement_Infrastructure.pdf">https://www.usip.org/sites/default/files/SR266-Reforming_Pakistan%E2%80%98s_Police_and_Law_Enforcement_Infrastructure.pdf</a>                                                                         |
|  | Paraguay                         | 2011 | 0.35 | International Security Sector Advisory Team | <a href="https://issat.dcaf.ch/mkd/Learn/Resource-Library/Country-Profiles/Paraguay-Country-Profile">https://issat.dcaf.ch/mkd/Learn/Resource-Library/Country-Profiles/Paraguay-Country-Profile</a>                                                                                                                                       |
|  | Peru                             | 2011 | 0.32 | International Security Sector Advisory Team | <a href="https://issat.dcaf.ch/mkd/Learn/Resource-Library/Country-Profiles/Peru-Country-Profile">https://issat.dcaf.ch/mkd/Learn/Resource-Library/Country-Profiles/Peru-Country-Profile</a>                                                                                                                                               |
|  | Philippines                      | 2017 | 0.16 | Philippine National Police                  | <a href="http://newsinfo.inquirer.net/891499/170000-man-pnp-on-high-alert-for-asean-meet-in-manila">http://newsinfo.inquirer.net/891499/170000-man-pnp-on-high-alert-for-asean-meet-in-manila</a>                                                                                                                                         |
|  | Poland                           | 2016 | 0.26 | European Union                              | <a href="https://ec.europa.eu/eurostat/web/products-eurostat-news/-/DDN-20190104-1">https://ec.europa.eu/eurostat/web/products-eurostat-news/-/DDN-20190104-1</a>                                                                                                                                                                         |
|  | Portugal                         | 2020 | 0.49 | Public Security Police                      | <a href="https://polis.osce.org/country-profiles/portugal">https://polis.osce.org/country-profiles/portugal</a>                                                                                                                                                                                                                           |
|  | Romania                          | 2016 | 0.24 | European Union                              | <a href="https://ec.europa.eu/eurostat/web/products-eurostat-news/-/DDN-20190104-1">https://ec.europa.eu/eurostat/web/products-eurostat-news/-/DDN-20190104-1</a>                                                                                                                                                                         |
|  | Rwanda                           | 2012 | 0.85 | Rwanda National Police                      | <a href="https://police.gov.rw/about-rnp/organisational-structure/commissioner-general-services/directorate-gender-promotion">https://police.gov.rw/about-rnp/organisational-structure/commissioner-general-services/directorate-gender-promotion</a>                                                                                     |
|  | Saint Vincent and the Grenadines | 2015 | 0.90 | International Security Sector Advisory Team | <a href="https://issat.dcaf.ch/Learn/Resource-Library2/Country-Profiles/Saint-Vincent-and-the-Grenadines-Country-Profile">https://issat.dcaf.ch/Learn/Resource-Library2/Country-Profiles/Saint-Vincent-and-the-Grenadines-Country-Profile</a>                                                                                             |
|  | Serbia                           | 2016 | 0.32 | Ministry of Inter Affairs                   | <a href="https://en.wikipedia.org/wiki/Police_of_Serbia#cite_note-aug16n1-2">https://en.wikipedia.org/wiki/Police_of_Serbia#cite_note-aug16n1-2</a>                                                                                                                                                                                       |
|  | Singapore                        | 2018 | 0.17 | Commercial Affairs Department               | <a href="https://www.police.gov.sg/media-room/publications?filter=9BC92AE1F3FF452D9CECC3D03C7D5BCB">https://www.police.gov.sg/media-room/publications?filter=9BC92AE1F3FF452D9CECC3D03C7D5BCB</a>                                                                                                                                         |
|  | Slovakia                         | 2016 | 0.40 | European Union                              | <a href="https://ec.europa.eu/eurostat/web/products-eurostat-news/-/DDN-20190104-1">https://ec.europa.eu/eurostat/web/products-eurostat-news/-/DDN-20190104-1</a>                                                                                                                                                                         |
|  | Slovenia                         | 2016 | 0.38 | European Union                              | <a href="https://ec.europa.eu/eurostat/web/products-eurostat-news/-/DDN-20190104-1">https://ec.europa.eu/eurostat/web/products-eurostat-news/-/DDN-20190104-1</a>                                                                                                                                                                         |
|  | Somalia                          | 2012 | 0.04 | United Nations                              | <a href="http://www.un.org/ga/search/view_doc.asp?symbol=S/2012/643">http://www.un.org/ga/search/view_doc.asp?symbol=S/2012/643</a>                                                                                                                                                                                                       |
|  | South Africa                     | 2019 | 0.09 | South African Police Services               | <a href="https://businesstech.co.za/news/government/325093/the-number-of-police-officers-vs-security-guards-in-south-africa/">https://businesstech.co.za/news/government/325093/the-number-of-police-officers-vs-security-guards-in-south-africa/</a>                                                                                     |
|  | South Korea                      | 2018 | 0.23 | Statista                                    | <a href="https://www.statista.com/statistics/644574/south-korea-police-officers-rate/">https://www.statista.com/statistics/644574/south-korea-police-officers-rate/</a>                                                                                                                                                                   |

|                                     |                     |      |      |                                                                                                              |                                                                                                                                                                                                                                                                                                                                                                                                                                                                                                                                                                                                                       |
|-------------------------------------|---------------------|------|------|--------------------------------------------------------------------------------------------------------------|-----------------------------------------------------------------------------------------------------------------------------------------------------------------------------------------------------------------------------------------------------------------------------------------------------------------------------------------------------------------------------------------------------------------------------------------------------------------------------------------------------------------------------------------------------------------------------------------------------------------------|
|                                     | South Sudan         | 2012 | 0.45 | Human Security Baseline Assessment                                                                           | <a href="http://www.smallarmssurveysudan.org/fileadmin/docs/issue-briefs/HSBA-IB-19-Arms-flows-and-holdings-South-Sudan.pdf">http://www.smallarmssurveysudan.org/fileadmin/docs/issue-briefs/HSBA-IB-19-Arms-flows-and-holdings-South-Sudan.pdf</a>                                                                                                                                                                                                                                                                                                                                                                   |
|                                     | Spain               | 2016 | 0.36 | European Union                                                                                               | <a href="https://ec.europa.eu/eurostat/web/products-eurostat-news/-/DDN-20190104-1">https://ec.europa.eu/eurostat/web/products-eurostat-news/-/DDN-20190104-1</a>                                                                                                                                                                                                                                                                                                                                                                                                                                                     |
|                                     | eSwatini            | 2010 | 0.34 | ROYAL SWAZILAND POLICE SERVICE                                                                               | <a href="https://web.archive.org/web/20130523182756/http://www.polic.e.gov.sz/rsp%20-%20annual%20report%202011.pdf">https://web.archive.org/web/20130523182756/http://www.polic.e.gov.sz/rsp%20-%20annual%20report%202011.pdf</a>                                                                                                                                                                                                                                                                                                                                                                                     |
|                                     | Sweden              | 2016 | 0.21 | European Union                                                                                               | <a href="https://ec.europa.eu/eurostat/web/products-eurostat-news/-/DDN-20190104-1">https://ec.europa.eu/eurostat/web/products-eurostat-news/-/DDN-20190104-1</a>                                                                                                                                                                                                                                                                                                                                                                                                                                                     |
|                                     | Switzerland         | 2016 | 0.22 | European Union                                                                                               | <a href="https://ec.europa.eu/eurostat/web/products-eurostat-news/-/DDN-20190104-1">https://ec.europa.eu/eurostat/web/products-eurostat-news/-/DDN-20190104-1</a>                                                                                                                                                                                                                                                                                                                                                                                                                                                     |
|                                     | Thailand            | 2016 | 0.30 | Thailand Development Research Institute                                                                      | <a href="https://www.bangkokpost.com/opinion/opinion/874400/how-to-boost-confidence-in-the-police">https://www.bangkokpost.com/opinion/opinion/874400/how-to-boost-confidence-in-the-police</a>                                                                                                                                                                                                                                                                                                                                                                                                                       |
|                                     | The Bahamas         | 2020 | 1.02 | International Criminal Police Organization                                                                   | <a href="https://www.interpol.int/Who-we-are/Member-countries/Americas/BAHAMAS">https://www.interpol.int/Who-we-are/Member-countries/Americas/BAHAMAS</a>                                                                                                                                                                                                                                                                                                                                                                                                                                                             |
|                                     | Trinidad and Tobago | 2020 | 0.50 | International Criminal Police Organization                                                                   | <a href="https://www.interpol.int/Who-we-are/Member-countries/Americas/TRINIDAD-TOBAGO">https://www.interpol.int/Who-we-are/Member-countries/Americas/TRINIDAD-TOBAGO</a>                                                                                                                                                                                                                                                                                                                                                                                                                                             |
|                                     | Uganda              | 2020 | 0.08 | Uganda Police Force                                                                                          | <a href="https://www.upf.go.ug/faq/">https://www.upf.go.ug/faq/</a>                                                                                                                                                                                                                                                                                                                                                                                                                                                                                                                                                   |
|                                     | Ukraine             | 2015 | 0.36 | International Security Sector Advisory Team                                                                  | <a href="https://issat.dcaf.ch/mkd/Learn/Resource-Library/Country-Profiles/Ukraine-SSR-Background-Note">https://issat.dcaf.ch/mkd/Learn/Resource-Library/Country-Profiles/Ukraine-SSR-Background-Note</a>                                                                                                                                                                                                                                                                                                                                                                                                             |
|                                     | United Kingdom      | 2019 | 0.22 | Home Office, England and Wales (2019); Police Service of Northern Ireland (2015); Scottish Government (2014) | <a href="https://assets.publishing.service.gov.uk/government/uploads/system/uploads/attachment_data/file/861800/police-workforce-sep19-hosb0220.pdf">https://assets.publishing.service.gov.uk/government/uploads/system/uploads/attachment_data/file/861800/police-workforce-sep19-hosb0220.pdf</a> ; <a href="https://www.psn.police.uk/">https://www.psn.police.uk/</a> ; <a href="https://www2.gov.scot/Topics/Statistics/Browse/Crime-Justice/PublicationPoliceStrength/POQS2014Q3/Publication">https://www2.gov.scot/Topics/Statistics/Browse/Crime-Justice/PublicationPoliceStrength/POQS2014Q3/Publication</a> |
|                                     | United States       | 2018 | 0.29 | U.S. Department of Justice                                                                                   | <a href="https://ucr.fbi.gov/crime-in-the-u.s/2018/crime-in-the-u.s.-2018/tables/table-74">https://ucr.fbi.gov/crime-in-the-u.s/2018/crime-in-the-u.s.-2018/tables/table-74</a>                                                                                                                                                                                                                                                                                                                                                                                                                                       |
|                                     | Uruguay             | 2013 | 0.78 | International Security Sector Advisory Team                                                                  | <a href="https://issat.dcaf.ch/mkd/Learn/Resource-Library/Country-Profiles/Uruguay-Country-Profile">https://issat.dcaf.ch/mkd/Learn/Resource-Library/Country-Profiles/Uruguay-Country-Profile</a>                                                                                                                                                                                                                                                                                                                                                                                                                     |
|                                     | Venezuela           | 2015 | 0.34 | International Security Sector Advisory Team                                                                  | <a href="https://issat.dcaf.ch/mkd/Learn/Resource-Library/Country-Profiles/Venezuela-Country-Profile">https://issat.dcaf.ch/mkd/Learn/Resource-Library/Country-Profiles/Venezuela-Country-Profile</a>                                                                                                                                                                                                                                                                                                                                                                                                                 |
| From non-official statistics (n=49) | Angola              | 2020 | 0.03 | Wikipedia                                                                                                    | <a href="https://en.wikipedia.org/wiki/Angola#External_links">https://en.wikipedia.org/wiki/Angola#External_links</a>                                                                                                                                                                                                                                                                                                                                                                                                                                                                                                 |
|                                     | Bangladesh          | 2018 | 0.16 | Wikipedia                                                                                                    | <a href="https://en.wikipedia.org/wiki/Bangladesh_Police#cite_note-1">https://en.wikipedia.org/wiki/Bangladesh_Police#cite_note-1</a>                                                                                                                                                                                                                                                                                                                                                                                                                                                                                 |
|                                     | Cape Verde          | 2012 | 0.36 | Wikipedia                                                                                                    | <a href="https://en.wikipedia.org/wiki/Law_enforcement_in_Cape_Verde">https://en.wikipedia.org/wiki/Law_enforcement_in_Cape_Verde</a>                                                                                                                                                                                                                                                                                                                                                                                                                                                                                 |
|                                     | Comoros             | 2020 | 0.11 | Wikipedia                                                                                                    | <a href="https://en.wikipedia.org/wiki/Military_of_the_Comoros">https://en.wikipedia.org/wiki/Military_of_the_Comoros</a>                                                                                                                                                                                                                                                                                                                                                                                                                                                                                             |
|                                     | Croatia             | 2020 | 0.51 | Wikipedia                                                                                                    | <a href="https://en.wikipedia.org/wiki/Law_enforcement_in_Croatia#Regular_Police_(Temeljna_policija)">https://en.wikipedia.org/wiki/Law_enforcement_in_Croatia#Regular_Police_(Temeljna_policija)</a>                                                                                                                                                                                                                                                                                                                                                                                                                 |

|  |                   |      |      |               |                                                                                                                                                                                                                                     |
|--|-------------------|------|------|---------------|-------------------------------------------------------------------------------------------------------------------------------------------------------------------------------------------------------------------------------------|
|  | Cuba              | 2015 | 0.38 | GunPolicy.org | <a href="https://www.gunpolicy.org/firearms/region/cuba">https://www.gunpolicy.org/firearms/region/cuba</a>                                                                                                                         |
|  | DR Congo          | 2020 | 0.17 | Wikipedia     | <a href="https://en.wikipedia.org/wiki/Congolese_National_Police">https://en.wikipedia.org/wiki/Congolese_National_Police</a>                                                                                                       |
|  | Egypt             | 2020 | 0.49 | Wikipedia     | <a href="https://en.wikipedia.org/wiki/Egyptian_National_Police">https://en.wikipedia.org/wiki/Egyptian_National_Police</a>                                                                                                         |
|  | El Salvador       | 2020 | 0.52 | Wikipedia     | <a href="https://en.wikipedia.org/wiki/National_Civil_Police_of_El_Salvador">https://en.wikipedia.org/wiki/National_Civil_Police_of_El_Salvador</a>                                                                                 |
|  | Equatorial Guinea | 2020 | 0.00 | Wikipedia     | <a href="https://en.wikipedia.org/wiki/Armed_Forces_of_Equatorial_Guinea">https://en.wikipedia.org/wiki/Armed_Forces_of_Equatorial_Guinea</a>                                                                                       |
|  | Gabon             | 2009 | 0.09 | Wikipedia     | <a href="https://en.wikipedia.org/wiki/National_Gendarmerie_of_Gabon">https://en.wikipedia.org/wiki/National_Gendarmerie_of_Gabon</a>                                                                                               |
|  | Georgia           | 2020 | 1.05 | Wikipedia     | <a href="https://en.wikipedia.org/wiki/Law_enforcement_in_Georgia_(country)">https://en.wikipedia.org/wiki/Law_enforcement_in_Georgia_(country)</a>                                                                                 |
|  | Ghana             | 2011 | 0.11 | Wikipedia     | <a href="https://en.wikipedia.org/wiki/Ghana_Police_Service">https://en.wikipedia.org/wiki/Ghana_Police_Service</a>                                                                                                                 |
|  | Guinea            | 2012 | 0.08 | Wikipedia     | <a href="https://en.wikipedia.org/wiki/List_of_countries_and_dependencies_by_number_of_police_officers#cite_note-2">https://en.wikipedia.org/wiki/List_of_countries_and_dependencies_by_number_of_police_officers#cite_note-2</a>   |
|  | Haiti             | 2018 | 0.15 | Wikipedia     | <a href="https://en.wikipedia.org/wiki/Haitian_National_Police">https://en.wikipedia.org/wiki/Haitian_National_Police</a>                                                                                                           |
|  | Hungary           | 2015 | 0.37 | Wikipedia     | <a href="https://en.wikipedia.org/wiki/List_of_countries_and_dependencies_by_number_of_police_officers#cite_note-2">https://en.wikipedia.org/wiki/List_of_countries_and_dependencies_by_number_of_police_officers#cite_note-2</a>   |
|  | Indonesia         | 2020 | 0.22 | Wikipedia     | <a href="https://en.wikipedia.org/wiki/Indonesian_National_Police">https://en.wikipedia.org/wiki/Indonesian_National_Police</a>                                                                                                     |
|  | Iran              | 2012 | 0.07 | Wikipedia     | <a href="https://en.wikipedia.org/wiki/List_of_countries_and_dependencies_by_number_of_police_officers#cite_note-49">https://en.wikipedia.org/wiki/List_of_countries_and_dependencies_by_number_of_police_officers#cite_note-49</a> |
|  | Jordan            | 2020 | 0.49 | Wikipedia     | <a href="https://en.wikipedia.org/wiki/Law_enforcement_in_Jordan#cite_note-1">https://en.wikipedia.org/wiki/Law_enforcement_in_Jordan#cite_note-1</a>                                                                               |
|  | Kiribati          | 2020 | 0.84 | Wikipedia     | <a href="https://en.wikipedia.org/wiki/Law_enforcement_in_Kiribati">https://en.wikipedia.org/wiki/Law_enforcement_in_Kiribati</a>                                                                                                   |
|  | Kuwait            | 2012 | 0.42 | Wikipedia     | <a href="https://en.wikipedia.org/wiki/List_of_countries_and_dependencies_by_number_of_police_officers#cite_note-49">https://en.wikipedia.org/wiki/List_of_countries_and_dependencies_by_number_of_police_officers#cite_note-49</a> |
|  | Liberia           | 2012 | 0.08 | Wikipedia     | <a href="https://en.wikipedia.org/wiki/List_of_countries_and_dependencies_by_number_of_police_officers#cite_note-49">https://en.wikipedia.org/wiki/List_of_countries_and_dependencies_by_number_of_police_officers#cite_note-49</a> |
|  | Madagascar        | 2006 | 0.04 | Wikipedia     | <a href="https://en.wikipedia.org/wiki/Law_enforcement_in_Madagascar">https://en.wikipedia.org/wiki/Law_enforcement_in_Madagascar</a>                                                                                               |
|  | Malaysia          | 2018 | 0.40 | Wikipedia     | <a href="https://en.wikipedia.org/wiki/Royal_Malaysia_Police">https://en.wikipedia.org/wiki/Royal_Malaysia_Police</a>                                                                                                               |
|  | Maldives          | 2017 | 0.92 | Wikipedia     | <a href="https://en.wikipedia.org/wiki/Maldives_Police_Service">https://en.wikipedia.org/wiki/Maldives_Police_Service</a>                                                                                                           |
|  | Malta             | 2018 | 0.45 | Wikipedia     | <a href="https://en.wikipedia.org/wiki/The_Malta_Police_Force">https://en.wikipedia.org/wiki/The_Malta_Police_Force</a>                                                                                                             |
|  | Myanmar           | 2013 | 0.17 | Wikipedia     | <a href="https://en.wikipedia.org/wiki/Myanmar_Police_Force">https://en.wikipedia.org/wiki/Myanmar_Police_Force</a>                                                                                                                 |
|  | Nepal             | 2020 | 0.23 | Wikipedia     | <a href="https://en.wikipedia.org/wiki/Nepal_Police#cite_note-1">https://en.wikipedia.org/wiki/Nepal_Police#cite_note-1</a>                                                                                                         |
|  | New Zealand       | 2016 | 0.25 | Wikipedia     | <a href="https://en.wikipedia.org/wiki/New_Zealand_Police">https://en.wikipedia.org/wiki/New_Zealand_Police</a>                                                                                                                     |

|            |                      |           |      |            |                                                                                                                                                                                                                                                                                                                                                           |
|------------|----------------------|-----------|------|------------|-----------------------------------------------------------------------------------------------------------------------------------------------------------------------------------------------------------------------------------------------------------------------------------------------------------------------------------------------------------|
|            | Niger                | 2012      | 0.04 | Wikipedia  | <a href="https://en.wikipedia.org/wiki/List_of_countries_and_dependencies_by_number_of_police_officers#cite_note-74">https://en.wikipedia.org/wiki/List_of_countries_and_dependencies_by_number_of_police_officers#cite_note-74</a>                                                                                                                       |
|            | Panama               | 2019      | 0.49 | Wikipedia  | <a href="https://en.wikipedia.org/wiki/Panamanian_National_Police">https://en.wikipedia.org/wiki/Panamanian_National_Police</a>                                                                                                                                                                                                                           |
|            | Papua New Guinea     | 2012      | 0.06 | Wikipedia  | <a href="https://en.wikipedia.org/wiki/List_of_countries_and_dependencies_by_number_of_police_officers#cite_note-USIP-81">https://en.wikipedia.org/wiki/List_of_countries_and_dependencies_by_number_of_police_officers#cite_note-USIP-81</a>                                                                                                             |
|            | Russia               | 2016      | 0.52 | Wikipedia  | <a href="https://en.wikipedia.org/wiki/List_of_countries_and_dependencies_by_number_of_police_officers#cite_note-2">https://en.wikipedia.org/wiki/List_of_countries_and_dependencies_by_number_of_police_officers#cite_note-2</a>                                                                                                                         |
|            | Saint Lucia          | 2015      | 0.54 | Wikipedia  | <a href="https://en.wikipedia.org/wiki/Royal_Saint_Lucia_Police_Force">https://en.wikipedia.org/wiki/Royal_Saint_Lucia_Police_Force</a>                                                                                                                                                                                                                   |
|            | Samoa                | 2019      | 0.51 | Wikipedia  | <a href="https://en.wikipedia.org/wiki/Law_enforcement_in_Samoa">https://en.wikipedia.org/wiki/Law_enforcement_in_Samoa</a>                                                                                                                                                                                                                               |
|            | Sierra Leone         | 2019      | 0.16 | Wikipedia  | <a href="https://en.wikipedia.org/wiki/Sierra_Leone_Police">https://en.wikipedia.org/wiki/Sierra_Leone_Police</a>                                                                                                                                                                                                                                         |
|            | Solomon Islands      | 2015      | 0.15 | Wikipedia  | <a href="https://en.wikipedia.org/wiki/Royal_Solomon_Islands_Police_Force">https://en.wikipedia.org/wiki/Royal_Solomon_Islands_Police_Force</a>                                                                                                                                                                                                           |
|            | Sri Lanka            | 2016      | 0.35 | Wikipedia  | <a href="https://en.wikipedia.org/wiki/Sri_Lanka_Police">https://en.wikipedia.org/wiki/Sri_Lanka_Police</a>                                                                                                                                                                                                                                               |
|            | Syria                | 2016      | 0.16 | Wikipedia  | <a href="https://en.wikipedia.org/wiki/Law_enforcement_in_Syria#cite_note-Aid29Feb16-75">https://en.wikipedia.org/wiki/Law_enforcement_in_Syria#cite_note-Aid29Feb16-75</a>                                                                                                                                                                               |
|            | The Gambia           | 2018      | 0.21 | Wikipedia  | <a href="https://en.wikipedia.org/wiki/The_Gambia_Police_Force">https://en.wikipedia.org/wiki/The_Gambia_Police_Force</a>                                                                                                                                                                                                                                 |
|            | Togo                 | 2012      | 0.05 | Wikipedia  | <a href="https://en.wikipedia.org/wiki/Law_enforcement_in_Togo">https://en.wikipedia.org/wiki/Law_enforcement_in_Togo</a>                                                                                                                                                                                                                                 |
|            | Tonga                | 2012      | 0.00 | Wikipedia  | <a href="https://en.wikipedia.org/wiki/List_of_countries_and_dependencies_by_number_of_police_officers#cite_note-106">https://en.wikipedia.org/wiki/List_of_countries_and_dependencies_by_number_of_police_officers#cite_note-106</a>                                                                                                                     |
|            | Tunisia              | 2017      | 0.13 | Wikipedia  | <a href="https://en.wikipedia.org/wiki/Tunisian_National_Guard">https://en.wikipedia.org/wiki/Tunisian_National_Guard</a>                                                                                                                                                                                                                                 |
|            | Turkey               | 2012      | 0.49 | Wikipedia  | <a href="https://en.wikipedia.org/wiki/List_of_countries_and_dependencies_by_number_of_police_officers#cite_note-106">https://en.wikipedia.org/wiki/List_of_countries_and_dependencies_by_number_of_police_officers#cite_note-106</a>                                                                                                                     |
|            | Turkmenistan         | 2019      | 0.41 | Wikipedia  | <a href="https://en.wikipedia.org/wiki/Law_enforcement_in_Turkmenistan">https://en.wikipedia.org/wiki/Law_enforcement_in_Turkmenistan</a>                                                                                                                                                                                                                 |
|            | United Arab Emirates | 2020      | 0.22 | Wikipedia  | <a href="https://en.wikipedia.org/wiki/Dubai_Police_Force">https://en.wikipedia.org/wiki/Dubai_Police_Force</a> ;<br><a href="https://en.wikipedia.org/wiki/Abu_Dhabi_Police">https://en.wikipedia.org/wiki/Abu_Dhabi_Police</a> ;<br><a href="https://en.wikipedia.org/wiki/United_Arab_Emirates">https://en.wikipedia.org/wiki/United_Arab_Emirates</a> |
|            | Vanuatu              | 2012      | 0.33 | Wikipedia  | <a href="https://en.wikipedia.org/wiki/List_of_countries_and_dependencies_by_number_of_police_officers#cite_note-106">https://en.wikipedia.org/wiki/List_of_countries_and_dependencies_by_number_of_police_officers#cite_note-106</a>                                                                                                                     |
|            | Yemen                | 2008      | 0.50 | Wikipedia  | <a href="https://en.wikipedia.org/wiki/Law_enforcement_in_Yemen">https://en.wikipedia.org/wiki/Law_enforcement_in_Yemen</a>                                                                                                                                                                                                                               |
|            | Zimbabwe             | 2018      | 0.30 | Wikipedia  | <a href="https://en.wikipedia.org/wiki/Zimbabwe_Republic_Police">https://en.wikipedia.org/wiki/Zimbabwe_Republic_Police</a>                                                                                                                                                                                                                               |
| Physicians | All                  | 2013-2019 | -    | World Bank | <a href="https://data.worldbank.org/indicator/SH.MED.PHYS.ZS">https://data.worldbank.org/indicator/SH.MED.PHYS.ZS</a>                                                                                                                                                                                                                                     |

|                                 |                        |      |       |                                                                               |                                                                                                                                                                                                                                                                                                                                                       |
|---------------------------------|------------------------|------|-------|-------------------------------------------------------------------------------|-------------------------------------------------------------------------------------------------------------------------------------------------------------------------------------------------------------------------------------------------------------------------------------------------------------------------------------------------------|
| Nursing and midwifery personnel | All                    | 2017 | -     | World Health Organization                                                     | <a href="https://apps.who.int/gho/data/node.main.HWFRGP_0040?lang=en">https://apps.who.int/gho/data/node.main.HWFRGP_0040?lang=en</a>                                                                                                                                                                                                                 |
| Other occupational population   | Afghanistan            | 2014 | 3.15  | The Central Statistics Organization of Afghanistan                            | <a href="https://afghanistan.unfpa.org/sites/default/files/pub-pdf/UNFPA%20SDES%20Mono%20Labour%2028%20May%20for%20web.pdf">https://afghanistan.unfpa.org/sites/default/files/pub-pdf/UNFPA%20SDES%20Mono%20Labour%2028%20May%20for%20web.pdf</a>                                                                                                     |
|                                 | Antigua and Barbuda†   | 2015 | 11.60 | Statistics Division, Ministry of Finance and Corporate Governance             | <a href="https://statistics.gov.ag/data/">https://statistics.gov.ag/data/</a>                                                                                                                                                                                                                                                                         |
|                                 | Armenia                | 2016 | 2.89  | Statistical Committee of the Republic of Armenia                              | <a href="https://armstat.am/file/article/trud_2017_4.1.pdf">https://armstat.am/file/article/trud_2017_4.1.pdf</a>                                                                                                                                                                                                                                     |
|                                 | Australia              | 2018 | 6.62  | Organization for Economic Co-operation and Development                        | <a href="https://stats.oecd.org/index.aspx?queryid=3491">https://stats.oecd.org/index.aspx?queryid=3491</a>                                                                                                                                                                                                                                           |
|                                 | Austria                | 2019 | 5.37  | Organization for Economic Co-operation and Development                        | <a href="https://stats.oecd.org/index.aspx?queryid=3491">https://stats.oecd.org/index.aspx?queryid=3491</a>                                                                                                                                                                                                                                           |
|                                 | Azerbaijan             | 2018 | 1.04  | The State Statistical Committee of the Republic of Azerbaijan                 | <a href="https://www.ceicdata.com/en/azerbaijan/employment-annual-statistical-classification-of-economic-activities-rev-2">https://www.ceicdata.com/en/azerbaijan/employment-annual-statistical-classification-of-economic-activities-rev-2</a>                                                                                                       |
|                                 | Bahrain                | 2010 | 3.15  | Central Bank of Bahrain                                                       | <a href="https://arabdevelopmentportal.com/sites/default/files/publication/706.statistical_bulletin_2013.pdf">https://arabdevelopmentportal.com/sites/default/files/publication/706.statistical_bulletin_2013.pdf</a>                                                                                                                                 |
|                                 | Barbados†              | 2004 | 1.74  | The Manpower Research and Statistical Unit Ministry of Labour & Civil Service | <a href="https://www.ilo.org/wcmsp5/groups/public/---americas/---ro-lima/---sro-port_of_spain/documents/meetingdocument/wcms_306324.pdf">https://www.ilo.org/wcmsp5/groups/public/---americas/---ro-lima/---sro-port_of_spain/documents/meetingdocument/wcms_306324.pdf</a>                                                                           |
|                                 | Belarus†               | 2019 | 5.62  | National Statistical Committee of the Republic of Belarus                     | <a href="https://www.belstat.gov.by/en/ofitsialnaya-statistika/Demographic-and-social-statistics/employment/">https://www.belstat.gov.by/en/ofitsialnaya-statistika/Demographic-and-social-statistics/employment/</a>                                                                                                                                 |
|                                 | Belgium                | 2019 | 4.01  | Organization for Economic Co-operation and Development                        | <a href="https://stats.oecd.org/index.aspx?queryid=3491">https://stats.oecd.org/index.aspx?queryid=3491</a>                                                                                                                                                                                                                                           |
|                                 | Benin                  | 2013 | 2.41  | The National Institute of Statistics and Economic Analysis                    | <a href="https://www.insae-bj.org/publications/publications-annuelles">https://www.insae-bj.org/publications/publications-annuelles</a>                                                                                                                                                                                                               |
|                                 | Bhutan                 | 2018 | 1.58  | The National Statistics Bureau                                                | <a href="http://www.nsb.gov.bt/publication/publications.php?id=3">http://www.nsb.gov.bt/publication/publications.php?id=3</a>                                                                                                                                                                                                                         |
|                                 | Bolivia                | 2012 | 4.09  | The Statistics National Institute                                             | <a href="https://www.ine.gob.bo/index.php/estadisticas-economicas/pib-y-cuentas-nacionales/producto-interno-bruto-trimestral/producto-interno-bruto-por-actividad-economica/">https://www.ine.gob.bo/index.php/estadisticas-economicas/pib-y-cuentas-nacionales/producto-interno-bruto-trimestral/producto-interno-bruto-por-actividad-economica/</a> |
|                                 | Bosnia and Herzegovina | 2018 | 3.36  | Agency for Statistics                                                         | <a href="http://www.bhas.ba/index.php?option=com_publicacija&amp;view=publicacija_pregled&amp;ids=1&amp;id=2&amp;n=Labour%20market">http://www.bhas.ba/index.php?option=com_publicacija&amp;view=publicacija_pregled&amp;ids=1&amp;id=2&amp;n=Labour%20market</a>                                                                                     |
|                                 | Botswana†              | 2018 | 2.25  | Statistics Botswana                                                           | <a href="http://www.statsbots.org.bw/statistics-botswana-2019-annual-report">http://www.statsbots.org.bw/statistics-botswana-2019-annual-report</a>                                                                                                                                                                                                   |
|                                 | Brazil                 | 2018 | 2.85  | Organization for Economic Co-operation and Development                        | <a href="https://stats.oecd.org/index.aspx?queryid=3491">https://stats.oecd.org/index.aspx?queryid=3491</a>                                                                                                                                                                                                                                           |

|  |                |      |      |                                                                           |                                                                                                                                                                                                                                                                         |
|--|----------------|------|------|---------------------------------------------------------------------------|-------------------------------------------------------------------------------------------------------------------------------------------------------------------------------------------------------------------------------------------------------------------------|
|  | Brunei         | 2018 | 5.72 | Department of Economic Planning and Statistics                            | <a href="http://www.deps.gov.bn/SitePages/Labour%20Force.aspx">http://www.deps.gov.bn/SitePages/Labour%20Force.aspx</a>                                                                                                                                                 |
|  | Bulgaria       | 2018 | 5.61 | National statistical institute                                            | <a href="https://www.nsi.bg/en/content/8165/number-persons-employed">https://www.nsi.bg/en/content/8165/number-persons-employed</a>                                                                                                                                     |
|  | Burkina Faso   | 2010 | 0.52 | National Institute of Statistics and Demography                           | <a href="http://www.insd.bf/n/contenu/pub_periodiques/annuaire_stat/Annuaire_stat_nationaux_BF/Annuaire_Statistique_National_2018.pdf">http://www.insd.bf/n/contenu/pub_periodiques/annuaire_stat/Annuaire_stat_nationaux_BF/Annuaire_Statistique_National_2018.pdf</a> |
|  | Burundi†       | 2018 | 0.00 | Institute of Statistics and Economic Studies of Burundi                   | <a href="https://www.isteebu.bi/wp-content/uploads/2020/05/Annuaire-2018.pdf">https://www.isteebu.bi/wp-content/uploads/2020/05/Annuaire-2018.pdf</a>                                                                                                                   |
|  | Cape Verde     | 2017 | 5.01 | CABO VERDE NATIONAL STATISTIC INSTITUTE                                   | <a href="http://ine.cv/quadros/estatisticas-emprego-mercado-trabalho-cv-imec2017/">http://ine.cv/quadros/estatisticas-emprego-mercado-trabalho-cv-imec2017/</a>                                                                                                         |
|  | Cambodia       | 2008 | 1.38 | National Institute of Statistics                                          | <a href="https://www.nis.gov.kh/index.php/km/2-uncategorised/11-cambodia-socio-economic-survey-tables">https://www.nis.gov.kh/index.php/km/2-uncategorised/11-cambodia-socio-economic-survey-tables</a>                                                                 |
|  | Canada         | 2016 | 5.81 | Organization for Economic Co-operation and Development                    | <a href="https://stats.oecd.org/Index.aspx?datasetcode=SNA_TABLE3">https://stats.oecd.org/Index.aspx?datasetcode=SNA_TABLE3</a>                                                                                                                                         |
|  | Chile          | 2019 | 3.80 | Organization for Economic Co-operation and Development                    | <a href="https://stats.oecd.org/index.aspx?queryid=3491">https://stats.oecd.org/index.aspx?queryid=3491</a>                                                                                                                                                             |
|  | China*         | 2018 | 1.01 | National Bureau of Statistics                                             | <a href="http://data.stats.gov.cn/easyquery.htm?cn=C01">http://data.stats.gov.cn/easyquery.htm?cn=C01</a>                                                                                                                                                               |
|  | Colombia       | 2019 | 2.07 | Organization for Economic Co-operation and Development                    | <a href="https://stats.oecd.org/index.aspx?queryid=3491">https://stats.oecd.org/index.aspx?queryid=3491</a>                                                                                                                                                             |
|  | Comoros        | 2013 | 0.23 | The National Institute of Statistics and Economic and Demographic Studies | <a href="http://www.inseed.km/index.php/publications/secteur-informel-et-emploi">http://www.inseed.km/index.php/publications/secteur-informel-et-emploi</a>                                                                                                             |
|  | Costa Rica     | 2019 | 3.55 | Organization for Economic Co-operation and Development                    | <a href="https://stats.oecd.org/index.aspx?queryid=3491">https://stats.oecd.org/index.aspx?queryid=3491</a>                                                                                                                                                             |
|  | Croatia        | 2011 | 5.39 | Central Bureau of Statistics of the Republic of Croatia                   | <a href="https://www.dzs.hr/Hrv_Eng/publication/2014/SI-1527.pdf">https://www.dzs.hr/Hrv_Eng/publication/2014/SI-1527.pdf</a>                                                                                                                                           |
|  | Cuba†          | 2012 | 5.46 | National Statistics and Information Office                                | <a href="http://www.onei.gob.cu/node/14808">http://www.onei.gob.cu/node/14808</a>                                                                                                                                                                                       |
|  | Cyprus         | 2019 | 5.87 | Statistical Service of Cyprus                                             | <a href="https://www.mof.gov.cy/mof/cystat/statistics.nsf/labour_31main_en/labour_31main_en?OpenForm&amp;sub=1&amp;sel=2">https://www.mof.gov.cy/mof/cystat/statistics.nsf/labour_31main_en/labour_31main_en?OpenForm&amp;sub=1&amp;sel=2</a>                           |
|  | Czech Republic | 2019 | 5.49 | Organization for Economic Co-operation and Development                    | <a href="https://stats.oecd.org/index.aspx?queryid=3491">https://stats.oecd.org/index.aspx?queryid=3491</a>                                                                                                                                                             |
|  | DR Congo       | 2008 | 0.80 | Ministry of Plan National Statistical Institute                           | <a href="http://ins.mkbco.pro/Publications/Publications-Annuelles/Annuaire/id/37/annuaire-statistiques">http://ins.mkbco.pro/Publications/Publications-Annuelles/Annuaire/id/37/annuaire-statistiques</a>                                                               |
|  | Denmark        | 2019 | 4.34 | Organization for Economic Co-operation and Development                    | <a href="https://stats.oecd.org/index.aspx?queryid=3491">https://stats.oecd.org/index.aspx?queryid=3491</a>                                                                                                                                                             |

|  |                     |      |       |                                                        |                                                                                                                                                                                                                                 |
|--|---------------------|------|-------|--------------------------------------------------------|---------------------------------------------------------------------------------------------------------------------------------------------------------------------------------------------------------------------------------|
|  | Dominican Republic† | 2010 | 3.27  | The National Statistical Office                        | <a href="https://www.one.gob.do/sociales/empleo-y-seguridad-social">https://www.one.gob.do/sociales/empleo-y-seguridad-social</a>                                                                                               |
|  | Ecuador             | 2010 | 3.17  | National Institute of Statistics and Censuses          | <a href="https://www.ecuadorencifras.gob.ec/documentos/web-inec/EMPLEO/2019/Septiembre/201909_Mercado_Laboral.pdf">https://www.ecuadorencifras.gob.ec/documentos/web-inec/EMPLEO/2019/Septiembre/201909_Mercado_Laboral.pdf</a> |
|  | Egypt               | 2017 | 3.41  | Central Agency for Public Mobilization and Statistics  | <a href="http://www.capmas.gov.eg/Pages/StaticPages.aspx?page_id=5034">http://www.capmas.gov.eg/Pages/StaticPages.aspx?page_id=5034</a>                                                                                         |
|  | El Salvador†        | 2007 | 2.63  | The General Directorate of Statistics and Censuses     | <a href="http://aplicaciones.digestyc.gob.sv/clasificadoresv2/Inicio/TipoClasificador?tipo=1">http://aplicaciones.digestyc.gob.sv/clasificadoresv2/Inicio/TipoClasificador?tipo=1</a>                                           |
|  | Equatorial Guinea   | 2015 | 3.70  | The National Statistics Institute of Equatorial Guinea | <a href="http://www.inege.gq/index.php/estadisticas/#">http://www.inege.gq/index.php/estadisticas/#</a>                                                                                                                         |
|  | Estonia             | 2019 | 5.88  | Organization for Economic Co-operation and Development | <a href="https://stats.oecd.org/index.aspx?queryid=3491">https://stats.oecd.org/index.aspx?queryid=3491</a>                                                                                                                     |
|  | Fiji                | 2018 | 3.90  | Fiji Bureau of Statistics                              | <a href="https://www.statsfiji.gov.fj/index.php/statistics/social-statistics/employment-statistics44">https://www.statsfiji.gov.fj/index.php/statistics/social-statistics/employment-statistics44</a>                           |
|  | Finland             | 2019 | 4.26  | Organization for Economic Co-operation and Development | <a href="https://stats.oecd.org/index.aspx?queryid=3491">https://stats.oecd.org/index.aspx?queryid=3491</a>                                                                                                                     |
|  | France              | 2019 | 3.96  | Organization for Economic Co-operation and Development | <a href="https://stats.oecd.org/index.aspx?queryid=3491">https://stats.oecd.org/index.aspx?queryid=3491</a>                                                                                                                     |
|  | Georgia†            | 2014 | 2.83  | National Statistics Office of Georgia                  | <a href="https://www.geostat.ge/en/modules/categories/38/employment-and-unemployment">https://www.geostat.ge/en/modules/categories/38/employment-and-unemployment</a>                                                           |
|  | Germany             | 2019 | 4.76  | Organization for Economic Co-operation and Development | <a href="https://stats.oecd.org/index.aspx?queryid=3491">https://stats.oecd.org/index.aspx?queryid=3491</a>                                                                                                                     |
|  | Ghana               | 2017 | 2.60  | The Ghana Statistical Service                          | <a href="https://www.statsghana.gov.gh/gssmain/fileUpload/pressrelease/GLSS7%20MAIN%20REPORT_FINAL.pdf">https://www.statsghana.gov.gh/gssmain/fileUpload/pressrelease/GLSS7%20MAIN%20REPORT_FINAL.pdf</a>                       |
|  | Greece              | 2019 | 4.58  | Organization for Economic Co-operation and Development | <a href="https://stats.oecd.org/index.aspx?queryid=3491">https://stats.oecd.org/index.aspx?queryid=3491</a>                                                                                                                     |
|  | Grenada             | 2015 | 11.92 | Central Statistical Office from Grenada.               | <a href="http://www.gov.gd/sites/default/files/docs/Documents/reports/Grenada_LFS_2013-2015.pdf">http://www.gov.gd/sites/default/files/docs/Documents/reports/Grenada_LFS_2013-2015.pdf</a>                                     |
|  | Guinea              | 2019 | 1.17  | The National Institute of Statistics                   | <a href="http://www.stat-guinee.org/index.php/publications-ins/91-rapports-d-enquetes">http://www.stat-guinee.org/index.php/publications-ins/91-rapports-d-enquetes</a>                                                         |
|  | Guinea-Bissau†      | 2009 | 0.35  | Ministry of Economy and Finance                        | <a href="http://www.stat-guineebissau.com/publicacao/publicacao.htm">http://www.stat-guineebissau.com/publicacao/publicacao.htm</a>                                                                                             |
|  | Guyana              | 2019 | 2.82  | The Bureau of Statistics                               | <a href="https://statisticsguyana.gov.gy/surveys/">https://statisticsguyana.gov.gy/surveys/</a>                                                                                                                                 |
|  | Hungary             | 2019 | 5.69  | Organization for Economic Co-operation and Development | <a href="https://stats.oecd.org/index.aspx?queryid=3491">https://stats.oecd.org/index.aspx?queryid=3491</a>                                                                                                                     |
|  | Iceland             | 2019 | 6.83  | Organization for Economic Co-operation and Development | <a href="https://stats.oecd.org/index.aspx?queryid=3491">https://stats.oecd.org/index.aspx?queryid=3491</a>                                                                                                                     |

|  |             |      |      |                                                               |                                                                                                                                                                                                                         |
|--|-------------|------|------|---------------------------------------------------------------|-------------------------------------------------------------------------------------------------------------------------------------------------------------------------------------------------------------------------|
|  | India       | 2014 | 0.02 | The Ministry of Statistics and Programme Implementation       | <a href="http://www.mospi.nic.in/statistical-year-book-india/2018/201">http://www.mospi.nic.in/statistical-year-book-india/2018/201</a>                                                                                 |
|  | Indonesia†  | 2010 | 1.94 | Organization for Economic Co-operation and Development        | <a href="https://stats.oecd.org/Index.aspx?datasetcode=SNA_TABLE3">https://stats.oecd.org/Index.aspx?datasetcode=SNA_TABLE3</a>                                                                                         |
|  | Iran†*      | 2012 | 6.29 | The Iran Social Science Data Porta                            | <a href="https://irandataportal.syr.edu/labor-force">https://irandataportal.syr.edu/labor-force</a>                                                                                                                     |
|  | Ireland     | 2019 | 5.55 | Organization for Economic Co-operation and Development        | <a href="https://stats.oecd.org/index.aspx?queryid=3491">https://stats.oecd.org/index.aspx?queryid=3491</a>                                                                                                             |
|  | Israel      | 2019 | 3.84 | Organization for Economic Co-operation and Development (OECD) | <a href="https://stats.oecd.org/index.aspx?queryid=3491">https://stats.oecd.org/index.aspx?queryid=3491</a>                                                                                                             |
|  | Italy       | 2019 | 4.01 | Organization for Economic Co-operation and Development (OECD) | <a href="https://stats.oecd.org/index.aspx?queryid=3491">https://stats.oecd.org/index.aspx?queryid=3491</a>                                                                                                             |
|  | Jamaica†    | 2014 | 5.58 | Statistical Institute of Jamaica                              | <a href="https://statinja.gov.jm/LabourForce/NewLFS.aspx">https://statinja.gov.jm/LabourForce/NewLFS.aspx</a>                                                                                                           |
|  | Japan       | 2019 | 6.25 | Organization for Economic Co-operation and Development (OECD) | <a href="https://stats.oecd.org/index.aspx?queryid=3491">https://stats.oecd.org/index.aspx?queryid=3491</a>                                                                                                             |
|  | Kazakhstan† | 2009 | 4.20 | The Agency of Statistics of the Republic of Kazakhstan        | <a href="https://www.ceicdata.com/en/kazakhstan/employment-by-industry-and-type">https://www.ceicdata.com/en/kazakhstan/employment-by-industry-and-type</a>                                                             |
|  | Kenya       | 2018 | 1.62 | Kenya National Bureau of Statistics                           | <a href="https://www.knbs.or.ke/?page_id=3142">https://www.knbs.or.ke/?page_id=3142</a>                                                                                                                                 |
|  | Kuwait†     | 2014 | 1.97 | The Central Statistics Bureau                                 | <a href="https://www.csb.gov.kw/Pages/Statistics_en?ID=64&amp;ParentCatID=1">https://www.csb.gov.kw/Pages/Statistics_en?ID=64&amp;ParentCatID=1</a>                                                                     |
|  | Kyrgyzstan  | 2018 | 5.66 | National Statistical Committee of the Kyrgyz Republic         | <a href="http://www.stat.kg/en/statistics/zanyatost/">http://www.stat.kg/en/statistics/zanyatost/</a>                                                                                                                   |
|  | Laos        | 2015 | 0.86 | Ministry of Planning and Investment, Lao Statistics Bureau    | <a href="https://www.ilo.org/surveyLib/index.php/catalog/2032/download/16711">https://www.ilo.org/surveyLib/index.php/catalog/2032/download/16711</a>                                                                   |
|  | Latvia      | 2019 | 6.14 | Organization for Economic Co-operation and Development        | <a href="https://stats.oecd.org/index.aspx?queryid=3491">https://stats.oecd.org/index.aspx?queryid=3491</a>                                                                                                             |
|  | Lebanon     | 2018 | 2.34 | The Central Administration of Statistics                      | <a href="http://www.cas.gov.lb/index.php/all-publications-en">http://www.cas.gov.lb/index.php/all-publications-en</a>                                                                                                   |
|  | Lesotho†    | 2011 | 1.07 | Bureau of Statistics                                          | <a href="http://www.bos.gov.ls/Publications.htm">http://www.bos.gov.ls/Publications.htm</a>                                                                                                                             |
|  | Liberia     | 2010 | 1.07 | Liberian Institute of Statistics and Geo-Information Services | <a href="https://www.ilo.org/wcmsp5/groups/public/---dgreports/---stat/documents/presentation/wcms_156366.pdf">https://www.ilo.org/wcmsp5/groups/public/---dgreports/---stat/documents/presentation/wcms_156366.pdf</a> |
|  | Libya†      | 2006 | 1.59 | Bureau of Statistics and Census Libya                         | <a href="http://bsc.ly/?P=5&amp;sec_Id=7&amp;dep_Id=6#82">http://bsc.ly/?P=5&amp;sec_Id=7&amp;dep_Id=6#82</a>                                                                                                           |
|  | Lithuania   | 2019 | 5.95 | Organization for Economic Co-operation and Development        | <a href="https://stats.oecd.org/index.aspx?queryid=3491">https://stats.oecd.org/index.aspx?queryid=3491</a>                                                                                                             |
|  | Luxembourg  | 2019 | 3.42 | Organization for Economic Co-operation and Development        | <a href="https://stats.oecd.org/index.aspx?queryid=3491">https://stats.oecd.org/index.aspx?queryid=3491</a>                                                                                                             |



|  |             |      |       |                                                                         |                                                                                                                                                                                                                                                                                                                                                                                       |
|--|-------------|------|-------|-------------------------------------------------------------------------|---------------------------------------------------------------------------------------------------------------------------------------------------------------------------------------------------------------------------------------------------------------------------------------------------------------------------------------------------------------------------------------|
|  | Malawi      | 2017 | 0.20  | The National Statistical Office of Malawi                               | <a href="http://www.nsomalawi.mw/">http://www.nsomalawi.mw/</a>                                                                                                                                                                                                                                                                                                                       |
|  | Malaysia    | 2018 | 1.39  | Ministry of Human Resources                                             | <a href="https://dfms.ilmia.gov.my/#/dataview/5cbabcf11e326200123a6ce2">https://dfms.ilmia.gov.my/#/dataview/5cbabcf11e326200123a6ce2</a>                                                                                                                                                                                                                                             |
|  | Maldives    | 2014 | 10.61 | National Bureau of Statistics                                           | <a href="http://statisticsmaldives.gov.mv/hies-statistical-release-iii-employment/">http://statisticsmaldives.gov.mv/hies-statistical-release-iii-employment/</a>                                                                                                                                                                                                                     |
|  | Malta       | 2011 | 6.33  | Organization for Economic Co-operation and Development                  | <a href="https://stats.oecd.org/Index.aspx?datasetcode=SNA_TABLE3">https://stats.oecd.org/Index.aspx?datasetcode=SNA_TABLE3</a>                                                                                                                                                                                                                                                       |
|  | Mauritius   | 2014 | 3.54  | Statistics Mauritius                                                    | <a href="http://statsmauritius.govmu.org/English/StatsbySubj/Pages/SEE-March-2014.aspx">http://statsmauritius.govmu.org/English/StatsbySubj/Pages/SEE-March-2014.aspx</a>                                                                                                                                                                                                             |
|  | Mexico      | 2019 | 3.58  | Organization for Economic Co-operation and Development                  | <a href="https://stats.oecd.org/index.aspx?queryid=3491">https://stats.oecd.org/index.aspx?queryid=3491</a>                                                                                                                                                                                                                                                                           |
|  | Moldova     | 2014 | 1.70  | Statistical Office of the Republic of Serbia                            | <a href="https://publikacije.stat.gov.rs/G2020/PdfE/G20201101.pdf">https://publikacije.stat.gov.rs/G2020/PdfE/G20201101.pdf</a>                                                                                                                                                                                                                                                       |
|  | Monaco      | 2019 | 26.25 | Monaco Statistics                                                       | <a href="https://www.monacostatistics.mc/Population-and-employment/employment">https://www.monacostatistics.mc/Population-and-employment/employment</a>                                                                                                                                                                                                                               |
|  | Mongolia    | 2018 | 3.88  | NATIONAL STATISTICAL COMMITTEE                                          | <a href="http://www.1212.mn/tables.aspx?tbl_id=DT_NS0_0400_067V1&amp;Indicator_select_all=1&amp;IndicatorSingleSelect=&amp;YearY_select_all=0&amp;YearYSingleSelect=_2018&amp;viewtype=table">http://www.1212.mn/tables.aspx?tbl_id=DT_NS0_0400_067V1&amp;Indicator_select_all=1&amp;IndicatorSingleSelect=&amp;YearY_select_all=0&amp;YearYSingleSelect=_2018&amp;viewtype=table</a> |
|  | Montenegro  | 2015 | 2.70  | The Statistical Office of Montenegro                                    | <a href="https://www.ilo.org/wcmsp5/groups/public/---ed_emp/documents/publication/wcms_537217.pdf">https://www.ilo.org/wcmsp5/groups/public/---ed_emp/documents/publication/wcms_537217.pdf</a>                                                                                                                                                                                       |
|  | Morocco†    | 2004 | 1.71  | High Commission for Planning                                            | <a href="https://www.hcp.ma/downloads/">https://www.hcp.ma/downloads/</a>                                                                                                                                                                                                                                                                                                             |
|  | Myanmar     | 2014 | 3.45  | Department of Population Ministry of Labour, Immigration and Population | <a href="https://myanmar.unfpa.org/sites/default/files/pub-pdf/4G_Labour%20Force.pdf">https://myanmar.unfpa.org/sites/default/files/pub-pdf/4G_Labour%20Force.pdf</a>                                                                                                                                                                                                                 |
|  | Namibia     | 2018 | 4.53  | Namibia Statistics Agency                                               | <a href="https://nsa.org.na/page/central-data-catalogue/">https://nsa.org.na/page/central-data-catalogue/</a>                                                                                                                                                                                                                                                                         |
|  | Nauru       | 2011 | 2.72  | Population and Housing Census                                           | <a href="https://microdata.pacificdata.org/index.php/catalog/26">https://microdata.pacificdata.org/index.php/catalog/26</a>                                                                                                                                                                                                                                                           |
|  | Nepal       | 2018 | 0.00  | National Planning Commission Central Bureau of Statistics               | <a href="https://nepalindata.com/media/resources/items/20/bNLFS-III_Final-Report.pdf">https://nepalindata.com/media/resources/items/20/bNLFS-III_Final-Report.pdf</a>                                                                                                                                                                                                                 |
|  | Netherlands | 2019 | 4.38  | Organization for Economic Co-operation and Development                  | <a href="https://stats.oecd.org/index.aspx?queryid=3491">https://stats.oecd.org/index.aspx?queryid=3491</a>                                                                                                                                                                                                                                                                           |
|  | New Zealand | 2019 | 5.06  | Organization for Economic Co-operation and Development                  | <a href="https://stats.oecd.org/index.aspx?queryid=3491">https://stats.oecd.org/index.aspx?queryid=3491</a>                                                                                                                                                                                                                                                                           |
|  | Nicaragua†  | 2005 | 1.72  | National Institute of Development Information                           | <a href="https://www.inide.gob.ni/Home/censoEcoUrbano">https://www.inide.gob.ni/Home/censoEcoUrbano</a>                                                                                                                                                                                                                                                                               |
|  | Niger†      | 2012 | 0.10  | National agency for the promotion of employment                         | <a href="http://www.stat-niger.org/statistique/">http://www.stat-niger.org/statistique/</a>                                                                                                                                                                                                                                                                                           |
|  | Nigeria     | 2017 | 1.66  | The National Bureau of Statistics                                       | <a href="https://nigerianstat.gov.ng/elibrary">https://nigerianstat.gov.ng/elibrary</a>                                                                                                                                                                                                                                                                                               |

|  |                                  |      |      |                                                                    |                                                                                                                                                                                                                                                                               |
|--|----------------------------------|------|------|--------------------------------------------------------------------|-------------------------------------------------------------------------------------------------------------------------------------------------------------------------------------------------------------------------------------------------------------------------------|
|  | Niue                             | 2018 | 5.25 | Census Report                                                      | <a href="https://pacific-data.sprep.org/dataset/niue-population-census">https://pacific-data.sprep.org/dataset/niue-population-census</a>                                                                                                                                     |
|  | North Korea                      | 2008 | 0.61 | Census Report                                                      | <a href="https://unstats.un.org/unsd/demographic/sources/census/wphc/North_Korea/Final%20national%20census%20report.pdf">https://unstats.un.org/unsd/demographic/sources/census/wphc/North_Korea/Final%20national%20census%20report.pdf</a>                                   |
|  | Norway                           | 2019 | 4.32 | Organization for Economic Co-operation and Development             | <a href="https://stats.oecd.org/index.aspx?queryid=3491">https://stats.oecd.org/index.aspx?queryid=3491</a>                                                                                                                                                                   |
|  | Pakistan                         | 2017 | 2.34 | Pakistan Bureau of Statistics                                      | <a href="http://www.pbs.gov.pk/content/labour-force-statistics">http://www.pbs.gov.pk/content/labour-force-statistics</a>                                                                                                                                                     |
|  | Palau                            | 2015 | 8.84 | Office of Planning and Statistics<br>Bureau of Budget and Planning | <a href="https://www.palagov.pw/wp-content/uploads/2017/02/2015-Census-of-Population-Housing-Agriculture-.pdf">https://www.palagov.pw/wp-content/uploads/2017/02/2015-Census-of-Population-Housing-Agriculture-.pdf</a>                                                       |
|  | Panama                           | 2019 | 6.41 | National Institute of Statistics and Census                        | <a href="https://www.inec.gob.pa/archivos/P0705547520191127130126Cuadro%207.pdf">https://www.inec.gob.pa/archivos/P0705547520191127130126Cuadro%207.pdf</a>                                                                                                                   |
|  | Papua New Guinea†                | 2001 | 0.15 | National Statistical Office                                        | <a href="https://www.nso.gov.pg/index.php/economics/business-statistics">https://www.nso.gov.pg/index.php/economics/business-statistics</a>                                                                                                                                   |
|  | Peru                             | 2007 | 4.01 | Organization for Economic Co-operation and Development             | <a href="https://stats.oecd.org/Index.aspx?datasetcode=SNA_TABLE3">https://stats.oecd.org/Index.aspx?datasetcode=SNA_TABLE3</a>                                                                                                                                               |
|  | Philippines                      | 2019 | 3.57 | The Philippine Statistics Authority                                | <a href="https://www.psa.gov.ph/statistics/survey/labor-and-employment/labor-force-survey/table">https://www.psa.gov.ph/statistics/survey/labor-and-employment/labor-force-survey/table</a>                                                                                   |
|  | Poland                           | 2019 | 4.17 | Organization for Economic Co-operation and Development             | <a href="https://stats.oecd.org/index.aspx?queryid=3491">https://stats.oecd.org/index.aspx?queryid=3491</a>                                                                                                                                                                   |
|  | Portugal                         | 2019 | 4.96 | Organization for Economic Co-operation and Development             | <a href="https://stats.oecd.org/index.aspx?queryid=3491">https://stats.oecd.org/index.aspx?queryid=3491</a>                                                                                                                                                                   |
|  | Qatar                            | 2010 | 2.36 | Planning and Statistics Authority                                  | <a href="https://www.psa.gov.qa/en/statistics/Statistical%20Releases/Social/LaborForce/2017/statistical_analysis_labor_force_2017_En.pdf">https://www.psa.gov.qa/en/statistics/Statistical%20Releases/Social/LaborForce/2017/statistical_analysis_labor_force_2017_En.pdf</a> |
|  | Romania                          | 2019 | 4.73 | National Institute of Statistics                                   | <a href="https://insse.ro/cms/sites/default/files/field/publicatii/forta_de_munca_in_romania_ocupare_si_somaj_2019.pdf">https://insse.ro/cms/sites/default/files/field/publicatii/forta_de_munca_in_romania_ocupare_si_somaj_2019.pdf</a>                                     |
|  | Russia                           | 2019 | 6.84 | Organization for Economic Co-operation and Development             | <a href="https://stats.oecd.org/index.aspx?queryid=3491">https://stats.oecd.org/index.aspx?queryid=3491</a>                                                                                                                                                                   |
|  | Rwanda                           | 2018 | 1.73 | The National Institute of Statistics of Rwanda                     | <a href="https://www.statistics.gov.rw/datasource/labour-force-survey-2018">https://www.statistics.gov.rw/datasource/labour-force-survey-2018</a>                                                                                                                             |
|  | Saint Lucia†                     | 2010 | 7.81 | Central Statistical Office                                         | <a href="https://data.govt.lc/dataset/labour-force-statistics">https://data.govt.lc/dataset/labour-force-statistics</a>                                                                                                                                                       |
|  | Saint Vincent and the Grenadines | 2012 | 6.11 | Statistical Office                                                 | <a href="http://stats.gov.vc/stats/?page_id=786">http://stats.gov.vc/stats/?page_id=786</a>                                                                                                                                                                                   |
|  | Samoa                            | 2017 | 3.06 | Samoa Bureau of Statistics                                         | <a href="https://www.sbs.gov.ws/digi/2017-Social%20Statistics-Samoa%20LFS%20Report%202017.pdf">https://www.sbs.gov.ws/digi/2017-Social%20Statistics-Samoa%20LFS%20Report%202017.pdf</a>                                                                                       |
|  | San Marino                       | 2020 | 1.82 | UFFICIO INFORMATICA,<br>TECNOLOGIA, DATI e STATISTICA              | <a href="https://www.statistica.sm/on-line/home.html">https://www.statistica.sm/on-line/home.html</a>                                                                                                                                                                         |
|  | Sao Tome and Principe†           | 2015 | 1.49 | National Institute of Statistics                                   | <a href="https://www.ine.st/index.php/publicacao/documentos/file/300-estimativa-de-emprego-por-sexo-segundo-profissao-e-sector-2000-2015">https://www.ine.st/index.php/publicacao/documentos/file/300-estimativa-de-emprego-por-sexo-segundo-profissao-e-sector-2000-2015</a> |

|  |                 |      |       |                                                                            |                                                                                                                                                                                                                                                                                                       |
|--|-----------------|------|-------|----------------------------------------------------------------------------|-------------------------------------------------------------------------------------------------------------------------------------------------------------------------------------------------------------------------------------------------------------------------------------------------------|
|  | Saudi Arabia    | 2010 | 2.38  | General Authority for statistics                                           | <a href="https://www.stats.gov.sa">https://www.stats.gov.sa</a>                                                                                                                                                                                                                                       |
|  | Senegal         | 2017 | 1.60  | National Agency for Statistics and Demography                              | <a href="http://www.ansd.sn/index.php?option=com_ansd&amp;view=titrepublication&amp;id=71">http://www.ansd.sn/index.php?option=com_ansd&amp;view=titrepublication&amp;id=71</a>                                                                                                                       |
|  | Serbia          | 2020 | 3.03  | Statistical Office of the Republic of Serbia                               | <a href="https://publikacije.stat.gov.rs/G2020/PdfE/G20201101.pdf">https://publikacije.stat.gov.rs/G2020/PdfE/G20201101.pdf</a>                                                                                                                                                                       |
|  | Seychelles      | 2010 | 12.16 | The National Bureau of Statistics                                          | <a href="https://www.nbs.gov.sc/downloads/social-statistics/unemployment-statistics/2018">https://www.nbs.gov.sc/downloads/social-statistics/unemployment-statistics/2018</a>                                                                                                                         |
|  | Sierra Leone†   | 2004 | 0.36  | Statistics Sierra Leone                                                    | <a href="https://www.statistics.sl/index.php/census/census-2015.html">https://www.statistics.sl/index.php/census/census-2015.html</a>                                                                                                                                                                 |
|  | Singapore       | 2020 | 14.10 | MINISTRY OF MANPOWER                                                       | <a href="https://stats.mom.gov.sg/Pages/Employment-Distribution-and-Employment-Level-by-Industry.aspx">https://stats.mom.gov.sg/Pages/Employment-Distribution-and-Employment-Level-by-Industry.aspx</a>                                                                                               |
|  | Slovakia        | 2019 | 5.55  | Organization for Economic Co-operation and Development                     | <a href="https://stats.oecd.org/index.aspx?queryid=3491">https://stats.oecd.org/index.aspx?queryid=3491</a>                                                                                                                                                                                           |
|  | Slovenia        | 2019 | 5.02  | Organization for Economic Co-operation and Development                     | <a href="https://stats.oecd.org/index.aspx?queryid=3491">https://stats.oecd.org/index.aspx?queryid=3491</a>                                                                                                                                                                                           |
|  | Solomon Islands | 2009 | 0.82  | National Statistics Office                                                 | 2009_Census_Report-on-Economic-activity-and-labour-force.pdf                                                                                                                                                                                                                                          |
|  | South Korea     | 2019 | 4.76  | Organization for Economic Co-operation and Development                     | <a href="https://stats.oecd.org/index.aspx?queryid=3491">https://stats.oecd.org/index.aspx?queryid=3491</a>                                                                                                                                                                                           |
|  | Spain           | 2019 | 5.34  | Organization for Economic Co-operation and Development                     | <a href="https://stats.oecd.org/index.aspx?queryid=3491">https://stats.oecd.org/index.aspx?queryid=3491</a>                                                                                                                                                                                           |
|  | Sri Lanka       | 2018 | 6.79  | Sri Lanka Labour Force Survey Department of Census and Statistics          | <a href="http://www.statistics.gov.lk/Pocket%20Book/chap03.pdf">http://www.statistics.gov.lk/Pocket%20Book/chap03.pdf</a>                                                                                                                                                                             |
|  | eSwatini †      | 2007 | 1.50  | The Government of the Kingdom of Eswatini                                  | <a href="http://www.gov.sz/index.php/component/content/article/124-economic-planning-a-development/1835-central-statistical-reports">http://www.gov.sz/index.php/component/content/article/124-economic-planning-a-development/1835-central-statistical-reports</a>                                   |
|  | Sweden          | 2019 | 4.19  | Organization for Economic Co-operation and Development                     | <a href="https://stats.oecd.org/Index.aspx?datasetcode=SNA_TABLE3">https://stats.oecd.org/Index.aspx?datasetcode=SNA_TABLE3</a>                                                                                                                                                                       |
|  | Switzerland     | 2019 | 4.51  | Organization for Economic Co-operation and Development                     | <a href="https://stats.oecd.org/index.aspx?queryid=3491">https://stats.oecd.org/index.aspx?queryid=3491</a>                                                                                                                                                                                           |
|  | Tajikistan      | 2016 | 1.62  | The Agency on statistics under the President of the Republic of Tajikistan | <a href="http://oldstat.wv.tj/en/img/de8558ce74dda7d9d14c5f7b0cdea0a2_1518005366.pdf">http://oldstat.wv.tj/en/img/de8558ce74dda7d9d14c5f7b0cdea0a2_1518005366.pdf</a>                                                                                                                                 |
|  | Tanzania        | 2016 | 0.50  | The National Bureau of Statistics                                          | <a href="https://www.nbs.go.tz/index.php/en/census-surveys/labour-statistics/145-formal-sector-employment-and-earnings-survey-2016-tanzania-mainland">https://www.nbs.go.tz/index.php/en/census-surveys/labour-statistics/145-formal-sector-employment-and-earnings-survey-2016-tanzania-mainland</a> |
|  | Thailand        | 2015 | 5.70  | The National Statistical Office                                            | <a href="http://www.nso.go.th/sites/2014en/Pages/survey/Social/Labour/The-Informal-Employment-Survey.aspx">http://www.nso.go.th/sites/2014en/Pages/survey/Social/Labour/The-Informal-Employment-Survey.aspx</a>                                                                                       |
|  | The Bahamas     | 2010 | 9.34  | Department of Statistics                                                   | <a href="https://www.bahamas.gov.bs/">https://www.bahamas.gov.bs/</a>                                                                                                                                                                                                                                 |

|  |                      |      |      |                                                                           |                                                                                                                                                                                                                                       |
|--|----------------------|------|------|---------------------------------------------------------------------------|---------------------------------------------------------------------------------------------------------------------------------------------------------------------------------------------------------------------------------------|
|  | The Gambia           | 2018 | 2.69 | The Gambia Bureau of Statistics Office                                    | <a href="https://microdata.worldbank.org/index.php/catalog/3584/download/47834">https://microdata.worldbank.org/index.php/catalog/3584/download/47834</a>                                                                             |
|  | Timor-Leste          | 2010 | 0.67 | National Statistics Directorate                                           | <a href="https://www.statistics.gov.tl/category/publications/census-publications/2010/">https://www.statistics.gov.tl/category/publications/census-publications/2010/</a>                                                             |
|  | Togo                 | 2010 | 2.80 | The National Institute of Statistics and Economic and Demographic Studies | <a href="https://inseed.tg/publications-sectorielles/">https://inseed.tg/publications-sectorielles/</a>                                                                                                                               |
|  | Tonga                | 2018 | 1.81 | Government of Tonga                                                       | 2018-Labour-Force-Survey-Report.pdf                                                                                                                                                                                                   |
|  | Tunisia†             | 2004 | 3.11 | The National Institute of Statistics                                      | <a href="http://census.ins.tn/fr/resultats#horizontalTab4">http://census.ins.tn/fr/resultats#horizontalTab4</a>                                                                                                                       |
|  | Turkey               | 2019 | 2.88 | Organization for Economic Co-operation and Development                    | <a href="https://stats.oecd.org/index.aspx?queryid=3491">https://stats.oecd.org/index.aspx?queryid=3491</a>                                                                                                                           |
|  | Uganda               | 2002 | 0.50 | UGANDA BUREAU OF STATISTICS                                               | <a href="https://www.ubos.org/wp-content/uploads/publications/10_2018Report_national_labour_force_survey_2016_17.pdf">https://www.ubos.org/wp-content/uploads/publications/10_2018Report_national_labour_force_survey_2016_17.pdf</a> |
|  | United Kingdom       | 2019 | 4.75 | Organization for Economic Co-operation and Development                    | <a href="https://stats.oecd.org/index.aspx?queryid=3491">https://stats.oecd.org/index.aspx?queryid=3491</a>                                                                                                                           |
|  | Ukraine              | 2019 | 3.71 | State Statistics Service of Ukraine                                       | <a href="https://ukrstat.org/en/operativ/operativ2014/rp/zn_ed/zn_ed_e/zn_ed_2013_e.htm">https://ukrstat.org/en/operativ/operativ2014/rp/zn_ed/zn_ed_e/zn_ed_2013_e.htm</a>                                                           |
|  | United Arab Emirates | 2018 | 0.67 | United Arab Emirates Ministry of Economy                                  | <a href="https://www.economy.gov.ae/EconomicalReportsEn/MOE_Annual%20Economic%20Report_2019_.pdf">https://www.economy.gov.ae/EconomicalReportsEn/MOE_Annual%20Economic%20Report_2019_.pdf</a>                                         |
|  | Uruguay              | 2018 | 5.07 | National Statistics Institute                                             | <a href="http://www.ine.gub.uy/documents/10181/623270/Anuario+Estadistico+2019/f854fb27-ad7f-4ce3-8c37-005ade0a6140">http://www.ine.gub.uy/documents/10181/623270/Anuario+Estadistico+2019/f854fb27-ad7f-4ce3-8c37-005ade0a6140</a>   |
|  | United States        | 2019 | 0.40 | Bureau of Economic Analysis                                               | <a href="https://apps.bea.gov/iTable/iTable.cfm?reqid=19&amp;step=2&amp;isuri=1&amp;1921=survey#">https://apps.bea.gov/iTable/iTable.cfm?reqid=19&amp;step=2&amp;isuri=1&amp;1921=survey#</a>                                         |
|  | Uzbekistan           | 2018 | 1.88 | State Committee of the Republic of Uzbekistan on Statistics               | <a href="https://stat.uz/en/181-ofytsyalnaia-statistyka-en/6384-labor-market">https://stat.uz/en/181-ofytsyalnaia-statistyka-en/6384-labor-market</a>                                                                                 |
|  | Venezuela            | 2018 | 4.30 | Statistics National Institute                                             | <a href="https://ine.gov.ve/index.php?option=com_content&amp;view=category&amp;id=103&amp;Itemid=40#">https://ine.gov.ve/index.php?option=com_content&amp;view=category&amp;id=103&amp;Itemid=40#</a>                                 |
|  | Vietnam              | 2018 | 4.97 | GENERAL STATISTICS OFFICE of VIETNAM                                      | <a href="https://www.gso.gov.vn/default_en.aspx?tabid=774">https://www.gso.gov.vn/default_en.aspx?tabid=774</a>                                                                                                                       |
|  | Yemen†               | 2016 | 0.18 | Central Statistical Organisation                                          | <a href="http://www.cso-yemen.com/content.php?lng=english&amp;id=690">http://www.cso-yemen.com/content.php?lng=english&amp;id=690</a>                                                                                                 |
|  | Zambia               | 2010 | 0.79 | Zambia Statistics Agency                                                  | <a href="https://www.zamstats.gov.zm/index.php/publications/category/7-labour">https://www.zamstats.gov.zm/index.php/publications/category/7-labour</a>                                                                               |
|  | Zimbabwe             | 2019 | 0.99 | Zimbabwe National Statistics Agency                                       | <a href="http://www.zimstat.co.zw/wp-content/uploads/publications/Economic/Employment/Labour-Force-Report-2019.pdf">http://www.zimstat.co.zw/wp-content/uploads/publications/Economic/Employment/Labour-Force-Report-2019.pdf</a>     |

|                               |     |      |   |            |                                                                                                                       |
|-------------------------------|-----|------|---|------------|-----------------------------------------------------------------------------------------------------------------------|
| Birth rate (per 1,000 people) | All | 2018 | - | World Bank | <a href="https://data.worldbank.org/indicator/SP.DYN.CBRT.IN">https://data.worldbank.org/indicator/SP.DYN.CBRT.IN</a> |
|-------------------------------|-----|------|---|------------|-----------------------------------------------------------------------------------------------------------------------|

†: The country combined communications, transportation and storage into the same section when counting the working population.

\*: Data on number of essential workers in Hong Kong, Macao and Taiwan regions in China were not available.

**Table. S2. Completeness analysis of data that included in this study**

| Goal                                         | Study population                                                                                | Definition                                                                                                                                                                                                                                                                                      | No. of observations (n=194) | Completeness |
|----------------------------------------------|-------------------------------------------------------------------------------------------------|-------------------------------------------------------------------------------------------------------------------------------------------------------------------------------------------------------------------------------------------------------------------------------------------------|-----------------------------|--------------|
| To maintain essential core societal services | Healthcare worker (i.e., physicians, nurses and midwiferies)                                    | Health care personnel that working in health-care settings who have the potential for exposure to SARS-CoV-2 infected individuals and/or to infectious materials (e.g., body substances, contaminated medical supplies and equipment, contaminated environmental surfaces, or contaminated air) | 194                         | 100%         |
|                                              | Physicians                                                                                      | Measured as the density of physicians multiplied by the number of populations in each country.                                                                                                                                                                                                  | 194                         | 100%         |
|                                              | Nurses and midwiferies                                                                          | Measured as the density of nurses and midwiferies multiplied by the number of populations in each country.                                                                                                                                                                                      | 194                         | 100%         |
|                                              | Police and military personnel                                                                   | Law enforcement personnel and military that protecting national security and stability, and experiencing potential greater risk of SARS-CoV-2 infections due to geographic location and crowded living or working conditions                                                                    | 150                         | 77.3%        |
|                                              | Police officers                                                                                 | Measured as the number of police officers                                                                                                                                                                                                                                                       | 149                         | 76.8%        |
|                                              | Military size                                                                                   | Measured as the military size                                                                                                                                                                                                                                                                   | 194                         | 100%         |
|                                              | Staff working in energy, food, and transportation sectors                                       | Personnel engaging in electricity, gas, water, food, steam, air condition and accommodation supply; participating sewerage, waste management and remediation activities; involving in domestic transportation and storage                                                                       | 144                         | 74.2%        |
|                                              | Personnel engaging in electricity, gas, water, steam, and air condition supply                  | Measured as the number of individuals electricity, gas, water, steam, and air condition supply.                                                                                                                                                                                                 | 150                         | 77.3%        |
|                                              | Personnel engaging in food and accommodation supplies                                           | Measured as the number of individuals engaging in food and accommodation supplies.                                                                                                                                                                                                              | 152                         | 78.4%        |
|                                              | Personnel engaging in domestic transportation and storage                                       | Measured as the number of individuals engaging in domestic transportation and storage.                                                                                                                                                                                                          | 144                         | 74.2%        |
| To reduce severe COVID-19 disease            | Population at an increased risk of COVID-19 severe disease                                      | Personnel experiencing an increased risk of severe/fatal COVID-19 disease                                                                                                                                                                                                                       | 184                         | 94.8%        |
|                                              | Personnel at an increased risk of COVID-19 severe disease due to age and underlying conditions. | Measured as the number of individuals at an increased risk of COVID-19 severe disease due to age and underlying conditions, provided by Clark A, et al.                                                                                                                                         | 184                         | 94.8%        |
|                                              | Pregnant women                                                                                  | Measured as the birth rate (per 1,000 persons) multiplied by the number of populations in each country.                                                                                                                                                                                         | 194                         | 100%         |
| To reduce symptomatic infections             | Population without any risk of COVID-19 severe                                                  | Personnel without any risk of severe/fatal COVID-19 disease                                                                                                                                                                                                                                     | 194*                        | 100%         |

| and/or to stop virus transmission | disease                                               |                                                                                                                |     |      |
|-----------------------------------|-------------------------------------------------------|----------------------------------------------------------------------------------------------------------------|-----|------|
|                                   | Personnel without any risk of severe COVID-19 disease | Measured as the number of individuals without any risk of COVID-19 severe disease, provided by Clark A, et al. | 184 | 100% |
|                                   | General population by age                             | Measured as the number of individuals at a given age group.                                                    | 194 | 100% |

\*The number of individuals aged 0-59 years old was used as an approximation of the number of personnel without any risk of severe/fatal COVID-19 disease in 10 countries.

**Table. S3. Observed number of persons for different target populations for COVID-19 vaccination**

| WHO region | Country                  | Total <sup>a</sup> | Maintaining essential core societal services <sup>a</sup> |                                                                    |          |                          |                                                                                |                                                                  |                                                            | Reducing severe COVID-19 disease <sup>a</sup>                 |                                                                |                                                                  |                                                                     |                                          | Reducing symptomatic infections and/or to stop virus transmission <sup>a</sup> |                                                                         |                                                                     |
|------------|--------------------------|--------------------|-----------------------------------------------------------|--------------------------------------------------------------------|----------|--------------------------|--------------------------------------------------------------------------------|------------------------------------------------------------------|------------------------------------------------------------|---------------------------------------------------------------|----------------------------------------------------------------|------------------------------------------------------------------|---------------------------------------------------------------------|------------------------------------------|--------------------------------------------------------------------------------|-------------------------------------------------------------------------|---------------------------------------------------------------------|
|            |                          |                    | Density of physician (person per 10,000 population)       | Density of nurses and midwives (person per size 10,000 population) | Military | No. of in police officer | No. of personnel engaging electricity, gas, water, steam, air condition supply | No. of personnel engaging in domestic transportation and storage | No. of personnel engaging in food and accommodation supply | No. of people aged ≥60 with at least one underlying condition | No. of people aged ≥80 years without any underlying conditions | No. of people aged 60-79 years without any underlying conditions | No. of people aged <60 years with at least one underlying condition | Birth rate (person per 1,000 population) | No. of healthy adults (20-59 years)                                            | No. school aged children (5-19 years) without any underlying conditions | No. of young children (0-4 years) without any underlying conditions |
| Africa     |                          |                    |                                                           |                                                                    |          |                          |                                                                                |                                                                  |                                                            |                                                               |                                                                |                                                                  |                                                                     |                                          |                                                                                |                                                                         |                                                                     |
|            | Algeria                  | 438.51             | 17.19                                                     | 15.48                                                              | 3.17     | 1.30                     | No data                                                                        | No data                                                          | No data                                                    | 30.17                                                         | 0.94                                                           | 12.33                                                            | 62.76                                                               | 24.28                                    | 134.67                                                                         | 107.87                                                                  | 48.85                                                               |
|            | Angola                   | 328.66             | 2.15                                                      | 4.08                                                               | 0.90     | 0.09                     | No data                                                                        | No data                                                          | No data                                                    | 8.05                                                          | 0.15                                                           | 3.83                                                             | 38.10                                                               | 40.73                                    | 75.61                                                                          | 123.40                                                                  | 56.39                                                               |
|            | Benin                    | 121.23             | 0.79                                                      | 3.89                                                               | 0.12     | No data                  | 0.05                                                                           | 1.43                                                             | 1.44                                                       | 3.99                                                          | 0.10                                                           | 2.07                                                             | 13.83                                                               | 36.22                                    | 32.76                                                                          | 42.40                                                                   | 18.58                                                               |
|            | Botswana                 | 23.52              | 5.27                                                      | 54.03                                                              | 0.09     | 0.10                     | 0.15                                                                           | 0.20                                                             | 0.17                                                       | 1.23                                                          | 0.02                                                           | 0.40                                                             | 5.18                                                                | 24.82                                    | 5.54                                                                           | 7.03                                                                    | 2.68                                                                |
|            | Burkina Faso             | 209.03             | 0.85                                                      | 8.83                                                               | 0.11     | 0.26                     | 0.06                                                                           | 0.45                                                             | 0.58                                                       | 5.20                                                          | 0.09                                                           | 2.92                                                             | 22.93                                                               | 37.93                                    | 57.78                                                                          | 76.82                                                                   | 33.70                                                               |
|            | Burundi                  | 118.91             | 1.00                                                      | 8.53                                                               | 0.31     | 0.18                     | 0.00                                                                           | 0.00                                                             | No data                                                    | 2.95                                                          | 0.07                                                           | 1.83                                                             | 12.31                                                               | 39.01                                    | 33.48                                                                          | 43.04                                                                   | 19.99                                                               |
|            | Cameroon                 | 265.46             | 0.88                                                      | 0.06                                                               | 0.24     | No data                  | No data                                                                        | No data                                                          | No data                                                    | 7.29                                                          | 0.14                                                           | 3.99                                                             | 31.42                                                               | 35.39                                    | 74.21                                                                          | 94.30                                                                   | 40.25                                                               |
|            | Cape Verde               | 5.56               | 7.81                                                      | 12.98                                                              | 0.01     | 0.02                     | 0.02                                                                           | 0.10                                                             | 0.16                                                       | 0.27                                                          | 0.01                                                           | 0.14                                                             | 0.77                                                                | 19.49                                    | 1.97                                                                           | 1.46                                                                    | 0.51                                                                |
|            | Central African Republic | 48.30              | 0.72                                                      | 2.06                                                               | 0.08     | 0.04                     | No data                                                                        | No data                                                          | No data                                                    | 1.46                                                          | 0.03                                                           | 0.67                                                             | 6.09                                                                | 35.35                                    | 11.12                                                                          | 18.47                                                                   | 7.14                                                                |
|            | Chad                     | 164.26             | 0.43                                                      | 2.32                                                               | 0.35     | No data                  | No data                                                                        | No data                                                          | No data                                                    | 4.17                                                          | 0.09                                                           | 2.21                                                             | 16.84                                                               | 42.17                                    | 40.48                                                                          | 62.46                                                                   | 28.63                                                               |
|            | Comoros                  | 8.70               | 2.72                                                      | 6.29                                                               | 0.00     | 0.01                     | 0.01                                                                           | 0.01                                                             | 0.00                                                       | 0.27                                                          | 0.01                                                           | 0.16                                                             | 0.95                                                                | 31.88                                    | 2.87                                                                           | 2.91                                                                    | 1.21                                                                |
|            | Congo                    | 55.18              | 1.65                                                      | 6.27                                                               | 0.12     | No data                  | No data                                                                        | No data                                                          | No data                                                    | 1.70                                                          | 0.03                                                           | 0.77                                                             | 7.42                                                                | 32.86                                    | 12.28                                                                          | 19.23                                                                   | 7.99                                                                |
|            | Côte d'Ivoire            | 263.78             | 2.31                                                      | 6.05                                                               | 0.25     | No data                  | No data                                                                        | No data                                                          | No data                                                    | 7.98                                                          | 0.13                                                           | 4.24                                                             | 31.87                                                               | 35.74                                    | 69.04                                                                          | 92.30                                                                   | 40.37                                                               |
|            | DR Congo                 | 895.61             | 0.74                                                      | 11.10                                                              | 1.34     | 1.50                     | 2.16                                                                           | 3.55                                                             | 1.41                                                       | 28.01                                                         | 0.61                                                           | 13.29                                                            | 101.46                                                              | 41.18                                    | 222.60                                                                         | 328.32                                                                  | 153.43                                                              |
|            | Equatorial Guinea        | 14.03              | 4.02                                                      | 5.02                                                               | 0.01     | 0.00                     | 0.13                                                                           | 0.26                                                             | 0.13                                                       | 0.37                                                          | 0.01                                                           | 0.16                                                             | 2.13                                                                | 33.24                                    | 4.28                                                                           | 4.14                                                                    | 1.94                                                                |
|            | Eritrea                  | 35.46              | 0.63                                                      | 14.40                                                              | 2.02     | No data                  | No data                                                                        | No data                                                          | No data                                                    | 1.42                                                          | 0.05                                                           | 0.81                                                             | 3.69                                                                | 30.30                                    | 8.09                                                                           | 12.73                                                                   | 4.83                                                                |
|            | eSwatini                 | 11.60              | 3.29                                                      | 41.42                                                              | 0.03     | 0.04                     | 0.03                                                                           | 0.11                                                             | 0.04                                                       | 0.53                                                          | 0.01                                                           | 0.12                                                             | 2.80                                                                | 26.34                                    | 2.25                                                                           | 3.89                                                                    | 1.40                                                                |
|            | Ethiopia                 | 1149.64            | 0.77                                                      | 7.14                                                               | 1.38     | 0.30                     | No data                                                                        | No data                                                          | No data                                                    | 35.94                                                         | 1.31                                                           | 23.97                                                            | 111.06                                                              | 32.34                                    | 354.45                                                                         | 401.23                                                                  | 164.21                                                              |



|                       |         |       |       |      |         |         |         |         |       |      |       |        |       |        |        |        |
|-----------------------|---------|-------|-------|------|---------|---------|---------|---------|-------|------|-------|--------|-------|--------|--------|--------|
| Gabon                 | 22.26   | 6.82  | 29.46 | 0.07 | 0.02    | No data | No data | No data | 0.83  | 0.02 | 0.35  | 3.19   | 31.61 | 6.37   | 6.68   | 3.13   |
| Ghana                 | 310.73  | 1.36  | 42.00 | 0.16 | 0.33    | 0.45    | 4.04    | 3.59    | 10.57 | 0.18 | 5.69  | 40.47  | 29.41 | 94.14  | 99.85  | 40.78  |
| Guinea                | 131.33  | 0.83  | 1.24  | 0.13 | 0.10    | 0.10    | 1.37    | 0.07    | 3.94  | 0.08 | 2.16  | 14.35  | 36.36 | 35.86  | 47.97  | 20.40  |
| Guinea-Bissau         | 19.68   | 1.27  | 6.85  | 0.04 | No data | 0.01    | 0.06    | 0.01    | 0.59  | 0.01 | 0.30  | 2.42   | 35.13 | 5.64   | 6.91   | 2.99   |
| Kenya                 | 537.71  | 1.57  | 11.66 | 0.29 | 0.40    | 1.41    | 3.88    | 3.41    | 13.86 | 0.29 | 8.22  | 70.71  | 28.75 | 163.68 | 186.71 | 68.68  |
| Lesotho               | 21.42   | 0.69  | 32.57 | 0.02 | 0.02    | 0.03    | 0.16    | 0.04    | 1.25  | 0.02 | 0.34  | 5.16   | 26.81 | 5.19   | 6.08   | 2.46   |
| Liberia               | 50.58   | 0.38  | 5.32  | 0.02 | 0.04    | 0.02    | 0.24    | 0.28    | 1.72  | 0.04 | 0.89  | 6.02   | 33.04 | 14.77  | 17.60  | 7.23   |
| Madagascar            | 276.91  | 1.81  | 1.46  | 0.22 | 0.11    | No data | No data | No data | 8.52  | 0.24 | 5.12  | 29.79  | 32.66 | 83.42  | 95.00  | 40.07  |
| Malawi                | 191.30  | 0.36  | 4.39  | 0.15 | No data | 0.08    | 0.14    | 0.15    | 5.20  | 0.11 | 2.51  | 27.59  | 34.12 | 50.74  | 69.76  | 28.24  |
| Mali                  | 202.51  | 1.29  | 3.59  | 0.18 | 0.13    | No data | No data | No data | 4.99  | 0.10 | 2.73  | 20.91  | 41.54 | 47.30  | 77.73  | 35.19  |
| Mauritania            | 46.50   | 1.87  | 9.25  | 0.21 | No data | No data | No data | No data | 1.53  | 0.03 | 0.81  | 5.20   | 33.69 | 13.59  | 15.51  | 6.76   |
| Mauritius             | 12.72   | 25.33 | 35.15 | 0.00 | 0.12    | 0.04    | 0.16    | 0.25    | 1.72  | 0.04 | 0.58  | 2.67   | 10.20 | 3.98   | 2.32   | 0.63   |
| Mozambique            | 312.55  | 0.84  | 6.85  | 0.11 | 0.23    | No data | No data | No data | 8.99  | 0.21 | 4.50  | 47.27  | 37.52 | 75.58  | 113.73 | 49.69  |
| Namibia               | 25.41   | 4.18  | 19.54 | 0.16 | No data | 0.07    | 0.25    | 0.83    | 1.02  | 0.02 | 0.38  | 4.46   | 28.64 | 6.18   | 7.96   | 3.29   |
| Niger                 | 242.07  | 0.43  | 2.70  | 0.10 | 0.09    | 0.08    | 0.12    | 0.05    | 6.21  | 0.11 | 3.63  | 23.89  | 46.08 | 56.56  | 93.50  | 46.49  |
| Nigeria               | 2061.40 | 3.81  | 11.79 | 2.15 | 3.72    | 0.91    | 23.90   | 9.35    | 57.17 | 0.82 | 35.02 | 232.99 | 37.91 | 547.24 | 737.18 | 329.61 |
| Rwanda                | 129.52  | 1.34  | 12.04 | 0.35 | 1.10    | 0.14    | 1.40    | 0.69    | 3.96  | 0.09 | 2.58  | 14.69  | 31.70 | 38.28  | 43.54  | 18.42  |
| São Tomé and Príncipe | 2.19    | 0.53  | 19.24 | 0.01 | No data | 0.00    | 0.02    | 0.01    | 0.07  | 0.00 | 0.04  | 0.26   | 31.54 | 0.59   | 0.80   | 0.31   |
| Senegal               | 167.44  | 0.69  | 3.13  | 0.19 | No data | 0.08    | 1.60    | 0.99    | 5.25  | 0.11 | 2.70  | 18.13  | 34.52 | 46.84  | 60.04  | 25.65  |
| Seychelles            | 0.98    | 21.21 | 80.77 | 0.01 | No data | 0.01    | 0.04    | 0.07    | 0.08  | 0.00 | 0.04  | 0.17   | 17.10 | 0.25   | 0.21   | 0.08   |
| Sierra Leone          | 79.77   | 0.25  | 2.24  | 0.09 | 0.13    | 0.08    | 0.16    | 0.05    | 2.41  | 0.05 | 1.24  | 9.67   | 33.41 | 24.25  | 27.75  | 11.23  |
| South Africa          | 593.09  | 9.05  | 13.08 | 0.80 | 0.51    | No data | No data | No data | 36.64 | 0.63 | 13.35 | 126.34 | 20.51 | 172.36 | 154.01 | 56.75  |
| South Sudan           | 111.94  | 2.62  | 6.95  | 1.85 | 0.50    | No data | No data | No data | 3.64  | 0.10 | 2.03  | 12.02  | 35.01 | 30.34  | 39.27  | 16.68  |
| Tanzania              | 597.34  | 0.14  | 5.84  | 1.10 | No data | 0.42    | 0.75    | 1.79    | 15.16 | 0.36 | 9.76  | 67.08  | 36.70 | 168.42 | 215.34 | 94.89  |
| The Gambia            | 24.17   | 1.02  | 15.45 | 0.01 | 0.05    | 0.08    | 0.28    | 0.28    | 0.61  | 0.01 | 0.33  | 2.65   | 38.54 | 6.22   | 8.66   | 4.00   |
| Togo                  | 82.79   | 0.77  | 4.10  | 0.10 | 0.04    | 0.03    | 1.07    | 1.21    | 2.45  | 0.04 | 1.39  | 10.01  | 33.11 | 23.06  | 28.73  | 11.86  |
| Uganda                | 457.41  | 1.68  | 12.38 | 0.46 | 0.37    | 0.14    | 1.25    | 0.88    | 9.16  | 0.19 | 5.41  | 53.97  | 38.14 | 117.17 | 174.54 | 75.78  |
| Zambia                | 183.84  | 11.87 | 13.38 | 0.16 | No data | 0.15    | 0.91    | 0.39    | 4.09  | 0.09 | 2.11  | 26.10  | 36.19 | 45.66  | 68.46  | 28.59  |

|                     |         |       |        |      |         |         |         |         |         |         |         |         |       |        |        |        |  |
|---------------------|---------|-------|--------|------|---------|---------|---------|---------|---------|---------|---------|---------|-------|--------|--------|--------|--|
| Zimbabwe            | 148.63  | 2.10  | 19.35  | 0.51 | 0.45    | 0.23    | 0.84    | 0.41    | 5.03    | 0.10    | 1.76    | 25.14   | 30.68 | 34.66  | 54.15  | 20.47  |  |
| Americas            |         |       |        |      |         |         |         |         |         |         |         |         |       |        |        |        |  |
| Antigua and Barbuda | 0.98    | 29.56 | 45.17  | 0.00 | 0.01    | 0.01    | 0.03    | 0.07    | 0.09    | 0.00    | 0.05    | 0.15    | 15.33 | 0.27   | 0.20   | 0.07   |  |
| Argentina           | 451.96  | 39.90 | 26.00  | 1.05 | 3.50    | No data | No data | No data | 46.19   | 2.17    | 21.85   | 52.56   | 17.02 | 157.88 | 104.77 | 36.74  |  |
| Barbados            | 2.87    | 24.84 | 30.60  | 0.01 | 0.02    | No data | 0.05    | No data | 0.45    | 0.02    | 0.19    | 0.43    | 10.65 | 0.74   | 0.50   | 0.15   |  |
| Belize              | 3.98    | 11.23 | 23.41  | 0.02 | 0.01    | No data | No data | No data | 0.20    | 0.01    | 0.10    | 0.56    | 20.79 | 1.03   | 1.11   | 0.38   |  |
| Bolivia             | 116.73  | 15.90 | 15.59  | 0.71 | 0.31    | 0.10    | 2.72    | 1.96    | 7.51    | 0.42    | 4.17    | 12.48   | 21.75 | 38.71  | 33.20  | 11.54  |  |
| Brazil              | 2125.59 | 21.64 | 101.19 | 7.30 | 3.19    | 6.37    | 26.96   | 27.25   | 177.83  | 8.88    | 111.87  | 250.71  | 13.92 | 866.94 | 440.94 | 141.67 |  |
| Canada              | 377.42  | 23.11 | 99.44  | 0.72 | 0.69    | 1.77    | 8.31    | 11.84   | 60.22   | 3.10    | 30.64   | 40.98   | 10.10 | 133.60 | 57.62  | 19.52  |  |
| Chile               | 191.16  | 25.91 | 133.25 | 1.22 | 0.65    | 0.88    | 3.90    | 2.49    | 21.34   | 0.99    | 10.90   | 22.77   | 12.43 | 72.63  | 36.54  | 11.44  |  |
| Colombia            | 508.83  | 21.85 | 13.31  | 4.81 | 1.60    | 1.55    | 5.37    | 3.62    | 41.41   | 1.79    | 23.76   | 58.42   | 14.88 | 206.24 | 114.39 | 36.49  |  |
| Costa Rica          | 50.94   | 28.94 | 34.14  | 0.00 | 0.05    | 0.26    | 0.69    | 0.87    | 4.95    | 0.20    | 2.52    | 6.84    | 13.97 | 19.80  | 10.33  | 3.41   |  |
| Cuba                | 113.27  | 84.22 | 75.61  | 0.76 | 0.43    | 0.86    | 2.79    | 2.53    | 14.97   | 0.91    | 8.20    | 15.97   | 10.17 | 39.43  | 17.91  | 5.55   |  |
| Dominica            | 0.72    | 11.19 | 64.39  | 0.00 | No data | 0.00    | 0.01    | 0.02    | No data | No data | No data | No data | 15.00 | 0.36   | 0.23   | 0.07   |  |
| Dominican Republic  | 108.48  | 15.27 | 13.80  | 0.71 | 0.32    | 0.26    | 2.03    | 1.26    | 7.38    | 0.37    | 4.30    | 13.18   | 19.51 | 38.37  | 28.07  | 9.80   |  |
| Ecuador             | 176.43  | 20.37 | 25.06  | 0.41 | 0.42    | 0.39    | 3.01    | 2.20    | 11.65   | 0.59    | 7.17    | 19.39   | 19.72 | 65.35  | 45.29  | 16.28  |  |
| El Salvador         | 64.86   | 15.66 | 18.34  | 0.42 | 0.34    | 0.07    | 0.92    | 0.72    | 5.28    | 0.23    | 2.31    | 8.69    | 18.25 | 22.27  | 16.56  | 5.64   |  |
| Grenada             | 1.13    | 14.07 | 62.84  | 0.00 | 0.01    | 0.01    | 0.05    | 0.07    | 0.11    | 0.00    | 0.05    | 0.17    | 16.47 | 0.29   | 0.24   | 0.09   |  |
| Guatemala           | 179.16  | 3.55  | 0.74   | 0.43 | 0.14    | No data | No data | No data | 8.83    | 0.33    | 3.80    | 22.33   | 24.56 | 60.25  | 56.04  | 20.28  |  |
| Guyana              | 7.87    | 8.02  | 10.40  | 0.03 | 0.03    | 0.03    | 0.10    | 0.08    | 0.57    | 0.02    | 0.27    | 1.19    | 19.97 | 2.57   | 2.08   | 0.72   |  |
| Haiti               | 114.03  | 2.34  | 6.80   | 0.00 | 0.17    | No data | No data | No data | 5.84    | 0.18    | 2.80    | 15.58   | 24.35 | 39.74  | 33.94  | 12.20  |  |
| Honduras            | 99.05   | 3.09  | 7.36   | 0.23 | 0.14    | No data | No data | No data | 4.80    | 0.18    | 2.32    | 12.35   | 21.60 | 36.97  | 29.23  | 9.96   |  |
| Jamaica             | 29.61   | 13.06 | 8.07   | 0.04 | 0.11    | 0.08    | 0.76    | 0.81    | 2.66    | 0.11    | 1.16    | 4.45    | 16.10 | 9.99   | 6.66   | 2.24   |  |
| Mexico              | 1289.33 | 23.83 | 23.96  | 3.36 | 4.30    | 2.51    | 18.15   | 25.55   | 104.92  | 3.03    | 36.97   | 210.48  | 17.60 | 420.10 | 323.13 | 107.98 |  |
| Nicaragua           | 66.25   | 9.78  | 15.33  | 0.12 | 0.12    | 0.05    | 0.66    | 0.43    | 3.77    | 0.13    | 1.85    | 8.52    | 20.64 | 24.36  | 18.25  | 6.45   |  |
| Panama              | 43.15   | 15.69 | 30.74  | 0.00 | 0.21    | 0.16    | 1.49    | 1.12    | 3.43    | 0.16    | 1.70    | 5.52    | 18.98 | 13.85  | 10.69  | 3.82   |  |
| Paraguay            | 71.33   | 13.54 | 16.60  | 0.27 | 0.25    | No data | No data | No data | 4.57    | 0.17    | 2.32    | 8.38    | 20.57 | 26.41  | 19.33  | 6.85   |  |
| Peru                | 329.72  | 13.05 | 24.40  | 1.58 | 1.04    | 0.24    | 8.25    | 4.74    | 23.26   | 1.41    | 16.58   | 35.84   | 17.95 | 127.88 | 74.12  | 27.63  |  |

|                                  |         |       |        |       |         |         |         |         |         |         |         |         |       |         |        |        |
|----------------------------------|---------|-------|--------|-------|---------|---------|---------|---------|---------|---------|---------|---------|-------|---------|--------|--------|
| Saint Kitts and Nevis            | 0.53    | 26.76 | 42.19  | 0.00  | No data | 0.00    | 0.01    | 0.02    | No data | No data | No data | No data | 13.00 | 0.28    | 0.11   | 0.03   |
| Saint Lucia                      | 1.84    | 6.41  | 31.55  | 0.00  | 0.01    | 0.01    | 0.05    | 0.09    | 0.18    | 0.01    | 0.08    | 0.29    | 12.00 | 0.65    | 0.34   | 0.11   |
| Saint Vincent and the Grenadines | 1.11    | 6.65  | 70.15  | 0.00  | 0.01    | 0.01    | 0.03    | 0.03    | 0.11    | 0.00    | 0.05    | 0.18    | 14.24 | 0.34    | 0.24   | 0.07   |
| Suriname                         | 5.87    | 12.10 | 27.57  | 0.02  | No data | No data | No data | No data | 0.42    | 0.01    | 0.20    | 0.90    | 18.54 | 2.05    | 1.47   | 0.51   |
| The Bahamas                      | 3.93    | 20.07 | 45.67  | 0.01  | 0.04    | 0.03    | 0.09    | 0.26    | 0.30    | 0.01    | 0.17    | 0.62    | 13.97 | 1.22    | 0.86   | 0.26   |
| Trinidad and Tobago              | 13.99   | 41.68 | 40.93  | 0.04  | 0.07    | No data | No data | No data | 1.64    | 0.05    | 0.68    | 2.39    | 12.94 | 4.60    | 2.68   | 0.86   |
| Uruguay                          | 34.74   | 50.79 | 19.41  | 0.22  | 0.27    | 0.21    | 0.88    | 0.67    | 4.79    | 0.26    | 1.97    | 4.07    | 13.86 | 11.40   | 6.93   | 2.33   |
| United States                    | 3310.03 | 26.12 | 145.48 | 22.60 | 9.75    | 4.83    | 4.09    | 4.19    | 538.21  | 18.73   | 200.24  | 404.50  | 11.60 | 1211.22 | 603.36 | 193.10 |
| Venezuela                        | 284.36  | 0.19  | 9.42   | 3.51  | 0.97    | 0.56    | 11.68   | No data | 22.75   | 0.68    | 11.01   | 36.56   | 17.88 | 79.50   | 76.29  | 23.26  |

Eastern  
Mediterranean

|              |         |       |       |      |         |         |         |         |       |      |       |        |       |        |        |        |
|--------------|---------|-------|-------|------|---------|---------|---------|---------|-------|------|-------|--------|-------|--------|--------|--------|
| Afghanistan  | 389.28  | 2.78  | 1.76  | 3.23 | 1.57    | 0.37    | 11.91   | No data | 12.00 | 0.16 | 4.28  | 60.19  | 32.49 | 80.69  | 139.08 | 53.12  |
| Bahrain      | 17.02   | 9.26  | 24.94 | 0.19 | No data | 0.01    | 0.17    | 0.36    | 0.65  | 0.01 | 0.25  | 2.98   | 13.99 | 8.28   | 2.78   | 1.05   |
| Djibouti     | 9.88    | 2.24  | 7.29  | 0.13 | No data | No data | No data | No data | 0.46  | 0.01 | 0.26  | 1.30   | 21.47 | 3.79   | 2.64   | 0.97   |
| Egypt        | 1023.34 | 4.52  | 19.26 | 8.36 | 5.00    | 5.75    | 17.71   | 11.48   | 60.28 | 1.14 | 22.75 | 160.09 | 26.38 | 292.62 | 287.37 | 121.36 |
| Iran         | 839.93  | 15.84 | 4.43  | 8.73 | 0.60    | 2.64    | 20.25   | 29.95   | 58.77 | 1.53 | 26.16 | 122.06 | 18.78 | 299.62 | 177.87 | 74.28  |
| Iraq         | 402.23  | 7.08  | 20.45 | 2.09 | 0.44    | No data | No data | No data | 14.77 | 0.28 | 5.50  | 54.01  | 29.08 | 118.51 | 131.94 | 52.09  |
| Jordan       | 102.03  | 23.24 | 28.21 | 1.16 | 0.50    | No data | No data | No data | 4.44  | 0.10 | 1.67  | 14.39  | 21.98 | 31.85  | 31.55  | 10.22  |
| Kuwait       | 42.71   | 26.46 | 74.15 | 0.25 | 0.18    | 0.01    | 0.54    | 0.29    | 1.78  | 0.02 | 0.99  | 7.77   | 13.94 | 18.90  | 8.13   | 2.82   |
| Lebanon      | 68.25   | 21.04 | 16.74 | 0.80 | No data | 0.12    | 0.79    | 0.69    | 5.52  | 0.16 | 1.97  | 11.09  | 17.55 | 23.98  | 16.23  | 5.46   |
| Libya        | 68.71   | 20.91 | 65.31 | 0.07 | 0.10    | 0.40    | 0.65    | 0.05    | 3.46  | 0.08 | 1.21  | 11.97  | 18.83 | 25.42  | 17.42  | 6.01   |
| Morocco      | 369.11  | 7.31  | 13.89 | 2.46 | 0.65    | 0.38    | 3.91    | 2.03    | 30.45 | 0.70 | 12.60 | 57.36  | 18.94 | 128.78 | 89.89  | 32.12  |
| Oman         | 51.07   | 20.03 | 41.97 | 0.47 | No data | No data | No data | No data | 1.54  | 0.03 | 0.60  | 8.14   | 19.19 | 24.52  | 8.64   | 4.39   |
| Pakistan     | 2208.92 | 9.80  | 6.68  | 9.36 | 3.54    | 4.48    | 35.01   | 12.18   | 97.10 | 2.67 | 49.08 | 271.55 | 28.25 | 704.77 | 679.07 | 274.07 |
| Qatar        | 28.81   | 24.85 | 72.63 | 0.22 | No data | 0.05    | 0.34    | 0.29    | 0.73  | 0.01 | 0.30  | 5.16   | 9.54  | 16.36  | 3.49   | 1.32   |
| Saudi Arabia | 348.14  | 26.12 | 54.76 | 2.52 | No data | 2.50    | 3.08    | 2.72    | 14.05 | 0.27 | 6.05  | 57.13  | 17.80 | 146.26 | 75.37  | 29.17  |
| Somalia      | 158.93  | 0.23  | 1.12  | 0.20 | 0.06    | No data | No data | No data | 4.50  | 0.11 | 2.64  | 15.74  | 41.75 | 39.99  | 59.97  | 27.48  |
| Sudan        | 438.49  | 2.62  | 6.95  | 1.24 | 0.50    | No data | No data | No data | 16.93 | 0.36 | 7.57  | 59.59  | 32.18 | 126.91 | 146.90 | 59.82  |

|                      |        |       |       |      |      |         |         |         |       |      |      |       |       |       |       |       |
|----------------------|--------|-------|-------|------|------|---------|---------|---------|-------|------|------|-------|-------|-------|-------|-------|
| Syria                | 175.01 | 12.87 | 15.41 | 2.39 | 0.28 | No data | No data | No data | 8.91  | 0.24 | 4.03 | 24.72 | 23.69 | 62.77 | 47.51 | 18.47 |
| Tunisia              | 118.19 | 13.03 | 25.14 | 0.48 | 0.15 | 1.03    | 1.59    | 1.06    | 10.81 | 0.33 | 4.73 | 17.25 | 17.56 | 43.23 | 25.26 | 9.74  |
| United Arab Emirates | 98.90  | 25.28 | 57.27 | 0.63 | 0.22 | 0.08    | 0.42    | 0.17    | 2.18  | 0.02 | 0.91 | 19.09 | 10.33 | 55.60 | 12.91 | 4.85  |
| Yemen                | 298.26 | 5.25  | 7.85  | 0.44 | 1.50 | 0.29    | 0.24    | 0.00    | 9.18  | 0.18 | 4.48 | 38.69 | 30.45 | 96.20 | 98.74 | 38.87 |

## Europe

|                        |        |       |        |      |         |         |         |         |         |         |         |         |       |        |        |       |
|------------------------|--------|-------|--------|------|---------|---------|---------|---------|---------|---------|---------|---------|-------|--------|--------|-------|
| Albania                | 28.78  | 12.16 | 36.50  | 0.09 | 0.10    | No data | No data | No data | 3.99    | 0.16    | 1.94    | 3.61    | 11.78 | 7.35   | 5.11   | 1.63  |
| Andorra                | 0.77   | 33.33 | 40.13  | 0.00 | No data | 7.20  | 0.49   | 0.13   | 0.03  |
| Armenia                | 29.63  | 44.02 | 61.07  | 0.49 | No data | 0.29    | 0.33    | 0.23    | 3.84    | 0.14    | 1.49    | 4.71    | 13.99 | 9.73   | 5.63   | 2.02  |
| Austria                | 90.06  | 51.70 | 2.63   | 0.21 | 0.29    | 0.45    | 2.08    | 2.31    | 15.82   | 0.79    | 6.51    | 11.76   | 9.70  | 31.45  | 12.62  | 4.42  |
| Azerbaijan             | 101.39 | 34.46 | 64.34  | 0.82 | No data | 0.28    | No data | 0.78    | 8.02    | 0.21    | 3.57    | 16.60   | 14.00 | 38.95  | 21.24  | 8.14  |
| Belarus                | 94.49  | 51.91 | 110.03 | 1.55 | 0.31    | 1.40    | 2.93    | 0.98    | 14.47   | 0.62    | 6.28    | 14.65   | 9.90  | 28.69  | 14.76  | 5.38  |
| Belgium                | 115.90 | 30.71 | 194.61 | 0.32 | 0.38    | 0.66    | 2.62    | 1.36    | 20.15   | 1.09    | 8.43    | 14.43   | 10.30 | 37.16  | 19.24  | 6.25  |
| Bosnia and Herzegovina | 32.81  | 21.62 | 57.33  | 0.11 | 0.17    | 0.32    | 0.37    | 0.41    | 6.06    | 0.19    | 2.05    | 5.10    | 8.11  | 11.28  | 4.92   | 1.31  |
| Bulgaria               | 69.48  | 40.33 | 48.16  | 0.31 | 0.24    | 0.65    | 1.74    | 1.51    | 14.05   | 0.52    | 5.02    | 10.01   | 8.90  | 21.27  | 9.85   | 3.07  |
| Croatia                | 41.05  | 30.00 | 81.22  | 0.18 | 0.21    | 0.39    | 0.90    | 0.92    | 8.25    | 0.37    | 3.00    | 5.60    | 9.00  | 12.68  | 5.92   | 1.81  |
| Cyprus                 | 12.07  | 19.51 | 52.51  | 0.16 | 0.07    | 0.05    | 0.15    | 0.50    | 1.56    | 0.07    | 0.76    | 1.41    | 10.46 | 4.45   | 2.03   | 0.64  |
| Czech Republic         | 107.09 | 41.21 | 83.96  | 0.22 | 0.41    | 1.08    | 3.23    | 1.56    | 20.63   | 0.66    | 6.72    | 15.94   | 10.70 | 32.94  | 15.71  | 5.50  |
| Denmark                | 57.92  | 40.10 | 103.20 | 0.15 | 0.11    | 0.33    | 1.17    | 1.02    | 10.69   | 0.43    | 4.02    | 7.72    | 10.60 | 18.37  | 9.43   | 3.05  |
| Estonia                | 13.27  | 44.83 | 111.56 | 0.06 | 0.04    | 0.06    | 0.45    | 0.28    | 2.57    | 0.12    | 0.87    | 2.03    | 10.90 | 3.71   | 2.05   | 0.68  |
| Finland                | 55.41  | 38.12 | 147.37 | 0.25 | 0.07    | 0.24    | 1.26    | 0.87    | 10.69   | 0.55    | 4.82    | 6.71    | 8.60  | 17.05  | 8.80   | 2.60  |
| France                 | 652.74 | 32.67 | 114.71 | 3.07 | 1.72    | 4.20    | 13.11   | 8.55    | 111.96  | 7.62    | 55.62   | 67.97   | 11.30 | 211.72 | 114.56 | 35.64 |
| Georgia                | 39.89  | 71.20 | 47.29  | 0.26 | 0.42    | 0.19    | 0.68    | 0.25    | 6.14    | 0.23    | 2.20    | 6.52    | 13.47 | 12.06  | 7.27   | 2.64  |
| Germany                | 837.84 | 42.49 | 132.35 | 1.80 | 3.16    | 5.70    | 20.47   | 13.75   | 162.77  | 9.90    | 67.24   | 102.89  | 9.50  | 273.14 | 114.35 | 40.06 |
| Greece                 | 104.23 | 54.79 | 36.33  | 1.46 | 0.55    | 0.60    | 1.46    | 2.72    | 19.49   | 1.48    | 9.02    | 12.13   | 8.10  | 34.54  | 14.95  | 4.04  |
| Hungary                | 96.60  | 34.08 | 69.16  | 0.40 | 0.36    | 0.90    | 2.84    | 1.75    | 18.85   | 0.64    | 6.35    | 14.12   | 9.60  | 30.15  | 13.77  | 4.55  |
| Iceland                | 3.41   | 40.78 | 162.13 | 0.00 | 0.01    | 0.02    | 0.12    | 0.10    | 0.48    | 0.02    | 0.23    | 0.42    | 12.00 | 1.05   | 0.65   | 0.20  |
| Ireland                | 49.38  | 33.13 | 161.00 | 0.09 | 0.15    | 0.25    | 0.87    | 1.62    | 6.54    | 0.26    | 2.90    | 6.62    | 12.50 | 15.52  | 9.92   | 3.08  |
| Israel                 | 86.56  | 46.25 | 3.30   | 1.78 | 0.28    | 0.29    | 1.45    | 1.58    | 9.23    | 0.46    | 4.55    | 8.49    | 20.80 | 26.18  | 21.67  | 8.36  |

|                |         |       |        |       |         |         |         |         |         |         |         |         |       |        |        |       |
|----------------|---------|-------|--------|-------|---------|---------|---------|---------|---------|---------|---------|---------|-------|--------|--------|-------|
| Italy          | 604.62  | 39.77 | 57.40  | 3.47  | 3.00    | 3.41    | 10.17   | 10.69   | 116.28  | 8.72    | 55.42   | 69.40   | 7.30  | 209.14 | 81.71  | 22.92 |
| Kazakhstan     | 187.77  | 39.80 | 72.94  | 0.71  | 0.08    | 2.51    | 5.37    | No data | 15.39   | 0.51    | 7.05    | 25.49   | 21.77 | 47.17  | 45.38  | 18.95 |
| Kyrgyzstan     | 65.24   | 22.13 | 59.45  | 0.11  | No data | 0.31    | 1.95    | 1.43    | 3.26    | 0.10    | 1.92    | 8.32    | 27.10 | 20.07  | 18.00  | 7.46  |
| Latvia         | 18.86   | 31.91 | 47.52  | 0.06  | 0.09    | 0.16    | 0.69    | 0.31    | 3.73    | 0.16    | 1.31    | 2.87    | 10.00 | 5.28   | 2.74   | 1.12  |
| Lithuania      | 27.22   | 63.53 | 98.47  | 0.34  | 0.08    | 0.28    | 0.98    | 0.37    | 5.35    | 0.27    | 1.86    | 4.23    | 10.00 | 7.46   | 3.86   | 1.43  |
| Luxembourg     | 6.26    | 30.09 | 121.74 | 0.02  | 0.02    | No data | 0.12    | 0.10    | 0.89    | 0.04    | 0.33    | 1.01    | 10.30 | 2.29   | 0.95   | 0.33  |
| Malta          | 4.42    | 28.60 | 94.83  | 0.02  | 0.02    | 0.04    | 0.10    | 0.14    | 0.86    | 0.03    | 0.35    | 0.57    | 9.20  | 1.37   | 0.60   | 0.21  |
| Moldova        | 40.34   | 32.07 | 49.24  | 0.07  | 0.02    | 0.15    | 0.38    | 0.16    | 5.05    | 0.16    | 2.41    | 6.87    | 10.10 | 16.14  | 6.20   | 1.99  |
| Monaco         | 0.39    | 75.07 | 201.61 | 0.00  | No data | 0.05    | 0.02    | 0.08    | No data | No data | No data | No data | 5.90  | 0.13   | 0.04   | 0.01  |
| Montenegro     | 6.28    | 27.56 | 52.29  | 0.12  | 0.05    | 0.04    | 0.13    | No data | 0.97    | 0.03    | 0.38    | 0.86    | 11.73 | 2.08   | 1.12   | 0.36  |
| Netherlands    | 171.35  | 36.05 | 111.84 | 0.41  | 0.50    | 0.65    | 3.54    | 3.32    | 30.88   | 1.40    | 13.29   | 22.13   | 9.70  | 54.98  | 27.58  | 8.47  |
| Macedonia      | 20.83   | 28.74 | 37.92  | 0.16  | 0.12    | 0.23    | 0.38    | 0.29    | 3.01    | 0.09    | 1.22    | 3.10    | 10.81 | 7.41   | 3.38   | 1.10  |
| Norway         | 54.21   | 29.16 | 182.25 | 0.23  | 0.18    | 0.29    | 1.17    | 0.89    | 8.33    | 0.40    | 3.89    | 6.69    | 10.40 | 18.29  | 9.20   | 2.96  |
| Poland         | 378.47  | 23.79 | 68.93  | 1.91  | 1.00    | 3.38    | 9.00    | 3.40    | 68.29   | 2.90    | 26.98   | 52.25   | 10.20 | 129.12 | 54.35  | 18.52 |
| Portugal       | 101.97  | 51.24 | 69.75  | 0.52  | 0.50    | 0.56    | 2.00    | 2.50    | 20.38   | 1.18    | 8.38    | 14.26   | 8.50  | 31.61  | 14.03  | 3.94  |
| Romania        | 192.38  | 29.81 | 73.89  | 1.26  | 0.47    | 1.98    | 4.92    | 2.19    | 34.09   | 1.58    | 14.23   | 26.12   | 9.60  | 62.92  | 29.53  | 9.25  |
| Russia         | 1459.34 | 37.49 | 85.43  | 14.54 | 7.57    | 23.73   | 57.99   | 18.15   | 230.51  | 8.62    | 87.94   | 235.76  | 11.50 | 411.20 | 237.65 | 90.97 |
| San Marino     | 0.34    | 61.09 | 82.07  | 0.00  | No data | 0.00    | 0.00    | 0.00    | No data | No data | No data | No data | 6.80  | 0.18   | 0.05   | 0.02  |
| Serbia         | 87.37   | 31.13 | 60.86  | 0.32  | 0.28    | 0.60    | 1.21    | 0.83    | 15.98   | 0.51    | 5.64    | 12.07   | 9.20  | 30.19  | 14.00  | 4.14  |
| Slovakia       | 54.60   | 34.16 | 3.19   | 0.16  | 0.22    | 0.47    | 1.58    | 0.98    | 8.85    | 0.29    | 3.60    | 8.02    | 10.60 | 18.84  | 8.02   | 2.79  |
| Slovenia       | 20.79   | 30.86 | 99.75  | 0.07  | 0.08    | 0.20    | 0.48    | 0.36    | 3.99    | 0.19    | 1.59    | 2.80    | 9.40  | 6.59   | 2.97   | 1.00  |
| Spain          | 467.55  | 38.72 | 57.30  | 1.96  | 1.68    | 2.26    | 8.74    | 13.97   | 78.57   | 5.53    | 38.70   | 58.60   | 7.90  | 162.93 | 67.08  | 19.36 |
| Sweden         | 100.99  | 39.84 | 118.16 | 0.30  | 0.21    | 0.56    | 2.27    | 1.40    | 18.30   | 0.87    | 7.03    | 13.20   | 11.40 | 31.70  | 16.51  | 5.90  |
| Switzerland    | 86.55   | 42.96 | 175.36 | 0.21  | 0.19    | 0.40    | 1.96    | 1.55    | 14.28   | 0.81    | 6.80    | 10.61   | 10.00 | 30.22  | 12.31  | 4.46  |
| Tajikistan     | 95.38   | 21.03 | 47.53  | 0.17  | No data | 0.21    | 1.04    | 0.30    | 3.52    | 0.08    | 1.90    | 12.12   | 30.76 | 30.22  | 28.94  | 13.31 |
| Turkey         | 843.39  | 18.49 | 27.11  | 5.12  | 4.13    | 2.08    | 9.28    | 12.96   | 77.07   | 2.36    | 30.78   | 123.46  | 16.03 | 299.66 | 195.25 | 63.87 |
| Turkmenistan   | 60.31   | 22.25 | 44.27  | 0.42  | 0.25    | No data | No data | No data | 3.21    | 0.09    | 1.59    | 8.73    | 23.83 | 19.54  | 16.21  | 6.51  |
| United Kingdom | 678.86  | 28.12 | 81.72  | 1.48  | 1.49    | 4.06    | 12.42   | 15.75   | 111.35  | 5.73    | 48.60   | 86.37   | 11.00 | 225.11 | 113.06 | 38.51 |
| Ukraine        | 437.34  | 29.92 | 66.61  | 2.97  | 1.59    | 3.18    | 9.99    | 3.04    | 71.13   | 3.06    | 29.21   | 72.20   | 8.70  | 145.97 | 66.25  | 20.73 |

|                        |                                |          |       |        |       |         |         |         |         |         |         |         |         |       |         |         |         |
|------------------------|--------------------------------|----------|-------|--------|-------|---------|---------|---------|---------|---------|---------|---------|---------|-------|---------|---------|---------|
|                        | Uzbekistan                     | 334.69   | 23.74 | 112.80 | 0.68  | No data | No data | 6.31    | No data | 18.39   | 0.44    | 8.88    | 50.19   | 23.30 | 102.63  | 84.07   | 33.74   |
| <b>South-East Asia</b> |                                |          |       |        |       |         |         |         |         |         |         |         |         |       |         |         |         |
|                        | Bangladesh                     | 1646.89  | 5.81  | 4.12   | 2.21  | 2.56    | No data | No data | No data | 80.17   | 3.65    | 47.27   | 190.36  | 18.18 | 668.47  | 438.65  | 141.73  |
|                        | Bhutan                         | 7.72     | 4.24  | 18.52  | 0.06  | No data | 0.05    | 0.03    | 0.05    | 0.42    | 0.02    | 0.25    | 0.89    | 17.26 | 3.27    | 1.91    | 0.63    |
|                        | India                          | 13800.04 | 8.57  | 17.27  | 30.31 | 19.26   | 1.88    | 0.37    | 0.01    | 861.52  | 28.85   | 505.74  | 2108.30 | 17.86 | 5436.48 | 3426.54 | 1098.70 |
|                        | Indonesia                      | 2735.24  | 4.27  | 24.15  | 6.76  | 5.90    | 2.40    | 50.79   | No data | 177.28  | 4.71    | 93.26   | 429.48  | 18.07 | 996.92  | 677.88  | 231.68  |
|                        | Maldives                       | 5.41     | 45.63 | 64.28  | 0.05  | 0.05    | 0.03    | 0.13    | 0.41    | 0.19    | 0.01    | 0.11    | 0.78    | 14.20 | 2.22    | 0.93    | 0.35    |
|                        | Myanmar                        | 544.10   | 6.77  | 9.99   | 5.13  | 0.93    | 0.71    | 8.18    | 9.86    | 35.91   | 0.78    | 17.74   | 88.24   | 17.55 | 184.47  | 137.69  | 44.00   |
|                        | Nepal                          | 291.37   | 7.49  | 31.08  | 1.12  | 0.67    | 0.00    | 0.00    | 0.00    | 16.04   | 0.45    | 8.72    | 34.97   | 19.89 | 111.63  | 84.47   | 26.36   |
|                        | North Korea                    | 257.79   | 36.83 | 44.49  | 18.80 | No data | 0.44    | 0.76    | 0.37    | 24.93   | 0.92    | 12.98   | 42.53   | 13.89 | 83.33   | 50.04   | 17.01   |
|                        | Sri Lanka                      | 214.13   | 10.04 | 21.80  | 3.17  | 0.76    | 7.13    | 5.02    | 2.38    | 23.38   | 0.67    | 11.15   | 31.84   | 15.83 | 59.37   | 48.93   | 16.27   |
|                        | Thailand                       | 698.00   | 8.05  | 27.59  | 4.55  | 2.11    | 1.70    | 12.23   | 25.85   | 81.38   | 4.37    | 48.38   | 110.51  | 10.34 | 244.44  | 117.77  | 35.01   |
|                        | Timor-Leste                    | 13.18    | 7.22  | 16.68  | 0.02  | No data | 0.00    | 0.06    | 0.02    | 0.56    | 0.02    | 0.29    | 1.65    | 29.42 | 4.04    | 4.37    | 1.73    |
| <b>Western Pacific</b> |                                |          |       |        |       |         |         |         |         |         |         |         |         |       |         |         |         |
|                        | Australia                      | 255.00   | 36.78 | 125.51 | 0.58  | 0.55    | 1.54    | 6.43    | 8.91    | 35.02   | 1.99    | 18.52   | 26.28   | 12.60 | 85.39   | 46.10   | 16.34   |
|                        | Brunei                         | 4.37     | 16.09 | 58.97  | 0.08  | 0.04    | 0.03    | 0.05    | 0.17    | 0.28    | 0.01    | 0.13    | 0.73    | 14.90 | 1.48    | 0.96    | 0.31    |
|                        | Cambodia                       | 167.19   | 1.93  | 6.86   | 1.91  | 0.64    | 0.16    | 1.55    | 0.60    | 7.81    | 0.20    | 4.64    | 22.98   | 22.46 | 59.24   | 46.26   | 17.30   |
|                        | China                          | 14393.24 | 19.80 | 26.62  | 26.95 | 20.00   | 36.92   | 81.90   | 26.98   | 1402.43 | 70.37   | 1024.96 | 2114.19 | 10.90 | 6104.69 | 2445.00 | 815.15  |
|                        | Cook Islands                   | 0.18     | 14.12 | 67.43  | 0.00  | No data | 13.70 | 0.05    | 0.02    | 0.01    |
|                        | Federated States of Micronesia | 1.15     | 0.26  | 20.43  | 0.00  | No data | No data | No data | No data | 0.07    | 0.00    | 0.02    | 0.24    | 22.82 | 0.30    | 0.33    | 0.12    |
|                        | Fiji                           | 8.96     | 8.60  | 33.75  | 0.04  | 0.04    | 0.04    | 0.13    | 0.18    | 0.69    | 0.01    | 0.16    | 2.08    | 21.28 | 2.17    | 2.32    | 0.87    |
|                        | Japan                          | 1264.76  | 24.12 | 121.53 | 2.61  | 2.88    | 6.00    | 36.60   | 36.40   | 275.31  | 24.05   | 134.76  | 146.92  | 7.40  | 364.56  | 160.35  | 46.55   |
|                        | Kiribati                       | 1.19     | 2.04  | 38.34  | 0.00  | 0.01    | No data | No data | No data | 0.06    | 0.00    | 0.02    | 0.27    | 27.89 | 0.23    | 0.36    | 0.15    |
|                        | Laos                           | 72.76    | 3.73  | 9.52   | 0.03  | No data | 0.13    | 0.28    | 0.21    | 3.22    | 0.08    | 1.65    | 10.41   | 23.55 | 25.86   | 21.32   | 7.76    |
|                        | Malaysia                       | 323.66   | 15.36 | 34.68  | 1.36  | 1.30    | 0.65    | 1.96    | 1.88    | 22.67   | 0.73    | 12.08   | 49.29   | 16.75 | 125.69  | 73.10   | 25.88   |
|                        | Marshall Islands               | 0.59     | 4.23  | 33.39  | 0.00  | No data | 23.80 | 0.39    | 0.25    | 0.09    |
|                        | Mongolia                       | 32.78    | 28.59 | 38.94  | 0.18  | No data | 0.21    | 0.70    | 0.36    | 1.52    | 0.04    | 0.83    | 4.47    | 24.13 | 11.42   | 8.34    | 3.70    |

|                  |         |       |        |       |         |         |         |         |         |         |         |         |       |        |        |        |
|------------------|---------|-------|--------|-------|---------|---------|---------|---------|---------|---------|---------|---------|-------|--------|--------|--------|
| Nauru            | 0.11    | 13.46 | 76.64  | 0.00  | No data | 0.00    | 0.00    | 0.00    | No data | No data | No data | No data | 23.20 | 0.05   | 0.03   | 0.01   |
| New Zealand      | 48.22   | 35.90 | 124.48 | 0.09  | 0.12    | 0.22    | 1.00    | 1.22    | 6.69    | 0.35    | 3.67    | 4.92    | 11.98 | 16.56  | 9.08   | 2.95   |
| Niue             | 0.02    | 0.29  | 125.00 | 0.00  | 0.00    | 0.00    | 0.00    | 0.00    | No data | No data | No data | No data | 9.00  | 0.01   | 0.00   | 0.00   |
| Palau            | 0.18    | 14.21 | 72.63  | 0.00  | No data | 0.00    | 0.00    | 0.01    | No data | No data | No data | No data | 14.00 | 0.13   | 0.05   | 0.01   |
| Papua New Guinea | 89.47   | 0.70  | 4.55   | 0.04  | 0.05    | 0.02    | 0.12    | No data | 3.95    | 0.05    | 1.37    | 17.31   | 27.07 | 25.67  | 27.73  | 10.69  |
| Philippines      | 1095.81 | 6.00  | 49.35  | 1.53  | 1.70    | 1.10    | 25.83   | 12.24   | 62.84   | 1.67    | 29.82   | 162.55  | 20.55 | 352.25 | 312.41 | 103.30 |
| Samoa            | 1.98    | 3.45  | 24.89  | 0.00  | 0.01    | 0.01    | 0.02    | 0.03    | 0.12    | 0.00    | 0.04    | 0.33    | 24.38 | 0.49   | 0.63   | 0.26   |
| Singapore        | 58.50   | 22.94 | 62.43  | 0.81  | 0.10    | 2.55    | 2.62    | 3.07    | 7.14    | 0.29    | 4.82    | 8.70    | 8.80  | 17.83  | 7.03   | 2.54   |
| Solomon Islands  | 6.87    | 1.94  | 21.64  | 0.00  | 0.01    | 0.00    | 0.04    | 0.01    | 0.28    | 0.01    | 0.10    | 1.16    | 32.44 | 1.74   | 2.28   | 1.00   |
| South Korea      | 512.69  | 23.61 | 73.01  | 36.80 | 1.18    | 1.93    | 8.23    | 14.25   | 72.75   | 3.95    | 42.01   | 72.31   | 6.40  | 164.59 | 67.85  | 18.61  |
| Tonga            | 1.06    | 5.40  | 41.57  | 0.00  | 0.00    | 0.00    | 0.01    | 0.01    | 0.07    | 0.00    | 0.02    | 0.20    | 24.30 | 0.26   | 0.34   | 0.12   |
| Tuvalu           | 0.12    | 9.11  | 42.59  | 0.00  | No data | 23.70 | 0.06   | 0.03   | 0.01   |
| Vanuatu          | 3.07    | 1.65  | 14.25  | 0.00  | 0.01    | No data | No data | No data | 0.13    | 0.00    | 0.04    | 0.55    | 29.60 | 0.77   | 0.99   | 0.41   |
| Vietnam          | 973.39  | 8.28  | 14.46  | 5.48  | No data | 3.15    | 17.74   | 27.53   | 75.93   | 3.70    | 40.25   | 144.90  | 16.75 | 354.06 | 204.65 | 77.48  |

<sup>a</sup>Unit used in this table is 0.1 millions people if not specified.

**Table. S4. Estimates of target population sizes for COVID-19 vaccination on a national scale, using multiple imputation procedure and bootstrap method for missing data on the number of essential workers who ensure basic life needs.**

| WHO region | Country                          | Total    | Maintaining essential core societal services<br>(100,000; mean, 95%CI) |                        |                              | Reducing severe COVID-19 disease<br>(100,000)                                  |                                                                  |                                                                              |                                                                                | Reducing symptomatic infections and/or to stop<br>virus transmission (100,000; mean, 95%CI) |                                 |                                                                                                                  | Total no. of<br>potential<br>vaccine<br>recipients,<br>excluding<br>SARS-CoV-<br>2 infected<br>individuals |                                                                                   |
|------------|----------------------------------|----------|------------------------------------------------------------------------|------------------------|------------------------------|--------------------------------------------------------------------------------|------------------------------------------------------------------|------------------------------------------------------------------------------|--------------------------------------------------------------------------------|---------------------------------------------------------------------------------------------|---------------------------------|------------------------------------------------------------------------------------------------------------------|------------------------------------------------------------------------------------------------------------|-----------------------------------------------------------------------------------|
|            |                                  |          | Healthcare<br>worker                                                   | Police and<br>military | Other essential workers      | People<br>aged ≥60<br>years with<br>at least<br>one<br>underlying<br>condition | People<br>aged ≥80<br>without<br>any<br>underlying<br>conditions | People<br>aged 60-<br>79 years<br>without<br>any<br>underlying<br>conditions | People<br>aged <60<br>years with<br>at least<br>one<br>underlying<br>condition | Pregnant<br>women                                                                           | Healthy adults (20-59 years)    | School<br>aged<br>children<br>and young<br>people (5-<br>19 years)<br>without<br>any<br>underlying<br>conditions |                                                                                                            | Young<br>children<br>(0-4<br>years)<br>without<br>any<br>underlying<br>conditions |
| Africa     | Subtotal                         | 11201.63 | 14.42                                                                  | 32.48                  | <b>206.95(144.04,290.53)</b> | 357.66                                                                         | 7.89                                                             | 189.88                                                                       | 1374.93                                                                        | 390.55                                                                                      | <b>3042.46(2958.82,3105.33)</b> | 3901.99                                                                                                          | 1682.45                                                                                                    | 11126.02                                                                          |
|            | Algeria                          | 438.51   | 1.43                                                                   | 4.47                   | <b>6.62(2.6,11.26)</b>       | 30.17                                                                          | 0.94                                                             | 12.33                                                                        | 62.76                                                                          | 10.65                                                                                       | <b>152.43(147.79,156.44)</b>    | 107.87                                                                                                           | 48.85                                                                                                      | 437.91                                                                            |
|            | Angola                           | 328.66   | 0.20                                                                   | 0.99                   | <b>15.75(7.6,28.23)</b>      | 8.05                                                                           | 0.15                                                             | 3.83                                                                         | 38.10                                                                          | 13.39                                                                                       | <b>68.42(55.93,76.56)</b>       | 123.40                                                                                                           | 56.39                                                                                                      | 328.54                                                                            |
|            | Benin                            | 121.23   | 0.06                                                                   | 0.12                   | 2.93                         | 3.99                                                                           | 0.10                                                             | 2.07                                                                         | 13.83                                                                          | 4.39                                                                                        | 32.76                           | 42.40                                                                                                            | 18.58                                                                                                      | 121.20                                                                            |
|            | Botswana                         | 23.52    | 0.14                                                                   | 0.19                   | 0.53                         | 1.23                                                                           | 0.02                                                             | 0.40                                                                         | 5.18                                                                           | 0.58                                                                                        | 5.54                            | 7.03                                                                                                             | 2.68                                                                                                       | 23.44                                                                             |
|            | Burkina Faso                     | 209.03   | 0.20                                                                   | 0.37                   | 1.09                         | 5.20                                                                           | 0.09                                                             | 2.92                                                                         | 22.93                                                                          | 7.93                                                                                        | 57.78                           | 76.82                                                                                                            | 33.70                                                                                                      | 209.01                                                                            |
|            | Burundi                          | 118.91   | 0.11                                                                   | 0.49                   | <b>0.03(0.01,0.04)</b>       | 2.95                                                                           | 0.07                                                             | 1.83                                                                         | 12.31                                                                          | 4.64                                                                                        | <b>33.46(33.44,33.48)</b>       | 43.04                                                                                                            | 19.99                                                                                                      | 118.90                                                                            |
|            | Cameroon                         | 265.46   | 0.02                                                                   | 0.24                   | <b>6.59(1.41,12.02)</b>      | 7.29                                                                           | 0.14                                                             | 3.99                                                                         | 31.42                                                                          | 9.39                                                                                        | <b>71.83(66.4,77.01)</b>        | 94.30                                                                                                            | 40.25                                                                                                      | 265.24                                                                            |
|            | Cape Verde                       | 5.56     | 0.01                                                                   | 0.03                   | 0.28                         | 0.27                                                                           | 0.01                                                             | 0.14                                                                         | 0.77                                                                           | 0.11                                                                                        | 1.97                            | 1.46                                                                                                             | 0.51                                                                                                       | 5.47                                                                              |
|            | Central African Republic         | 48.30    | 0.01                                                                   | 0.12                   | <b>0.46(0.1,0.98)</b>        | 1.46                                                                           | 0.03                                                             | 0.67                                                                         | 6.09                                                                           | 1.71                                                                                        | <b>12.15(11.62,12.5)</b>        | 18.47                                                                                                            | 7.14                                                                                                       | 48.25                                                                             |
|            | Chad                             | 164.26   | 0.05                                                                   | 0.35                   | <b>1.55(0.68,2.45)</b>       | 4.17                                                                           | 0.09                                                             | 2.21                                                                         | 16.84                                                                          | 6.93                                                                                        | <b>40.99(40.09,41.86)</b>       | 62.46                                                                                                            | 28.63                                                                                                      | 164.24                                                                            |
|            | Comoros                          | 8.70     | 0.01                                                                   | 0.01                   | 0.02                         | 0.27                                                                           | 0.01                                                             | 0.16                                                                         | 0.95                                                                           | 0.28                                                                                        | 2.87                            | 2.91                                                                                                             | 1.21                                                                                                       | 8.69                                                                              |
|            | Congo                            | 55.18    | 0.04                                                                   | 0.12                   | <b>1.2(0.73,1.77)</b>        | 1.70                                                                           | 0.03                                                             | 0.77                                                                         | 7.42                                                                           | 1.81                                                                                        | <b>14.87(14.3,15.34)</b>        | 19.23                                                                                                            | 7.99                                                                                                       | 55.13                                                                             |
|            | Cote d'Ivoire                    | 263.78   | 0.22                                                                   | 0.25                   | <b>4.89(1.83,8.93)</b>       | 7.98                                                                           | 0.13                                                             | 4.24                                                                         | 31.87                                                                          | 9.43                                                                                        | <b>72.09(68.05,75.15)</b>       | 92.30                                                                                                            | 40.37                                                                                                      | 263.57                                                                            |
|            | Democratic Republic of the Congo | 895.61   | 1.06                                                                   | 2.84                   | 7.13                         | 28.01                                                                          | 0.61                                                             | 13.29                                                                        | 101.46                                                                         | 36.88                                                                                       | 222.60                          | 328.32                                                                                                           | 153.43                                                                                                     | 895.50                                                                            |
|            | Equatorial Guinea                | 14.03    | 0.01                                                                   | 0.01                   | 0.52                         | 0.37                                                                           | 0.01                                                             | 0.16                                                                         | 2.13                                                                           | 0.47                                                                                        | 4.28                            | 4.14                                                                                                             | 1.94                                                                                                       | 13.98                                                                             |
|            | Eritrea                          | 35.46    | 0.05                                                                   | 2.02                   | <b>1.03(0.4,1.75)</b>        | 1.42                                                                           | 0.05                                                             | 0.81                                                                         | 3.69                                                                           | 1.07                                                                                        | <b>7.76(7.04,8.39)</b>          | 12.73                                                                                                            | 4.83                                                                                                       | 35.46                                                                             |



|                       |         |      |      |                           |       |      |       |        |       |                              |        |        |         |
|-----------------------|---------|------|------|---------------------------|-------|------|-------|--------|-------|------------------------------|--------|--------|---------|
| Ethiopia              | 1149.64 | 0.91 | 1.68 | <b>23.41(5.84,47.62)</b>  | 35.94 | 1.31 | 23.97 | 111.06 | 37.18 | <b>348.73(324.52,366.31)</b> | 401.23 | 164.21 | 1086.56 |
| Gabon                 | 22.26   | 0.08 | 0.09 | <b>0.96(0.36,1.67)</b>    | 0.83  | 0.02 | 0.35  | 3.19   | 0.70  | <b>6.22(5.51,6.82)</b>       | 6.68   | 3.13   | 22.17   |
| Ghana                 | 310.73  | 1.35 | 0.49 | 8.08                      | 10.57 | 0.18 | 5.69  | 40.47  | 9.14  | 94.14                        | 99.85  | 40.78  | 310.24  |
| Guinea                | 131.33  | 0.03 | 0.23 | 1.54                      | 3.94  | 0.08 | 2.16  | 14.35  | 4.78  | 35.86                        | 47.97  | 20.40  | 131.20  |
| Guinea-Bissau         | 19.68   | 0.02 | 0.04 | 0.07                      | 0.59  | 0.01 | 0.30  | 2.42   | 0.69  | 5.64                         | 6.91   | 2.99   | 19.66   |
| Kenya                 | 537.71  | 0.71 | 0.69 | 8.70                      | 13.86 | 0.29 | 8.22  | 70.71  | 15.46 | 163.68                       | 186.71 | 68.68  | 537.09  |
| Lesotho               | 21.42   | 0.07 | 0.04 | 0.23                      | 1.25  | 0.02 | 0.34  | 5.16   | 0.57  | 5.19                         | 6.08   | 2.46   | 21.40   |
| Liberia               | 50.58   | 0.03 | 0.06 | 0.54                      | 1.72  | 0.04 | 0.89  | 6.02   | 1.67  | 14.77                        | 17.60  | 7.23   | 50.56   |
| Madagascar            | 276.91  | 0.09 | 0.33 | <b>2.1(0.59,4.18)</b>     | 8.52  | 0.24 | 5.12  | 29.79  | 9.04  | <b>86.61(84.53,88.12)</b>    | 95.00  | 40.07  | 276.74  |
| Malawi                | 191.30  | 0.09 | 0.15 | 0.37                      | 5.20  | 0.11 | 2.51  | 27.59  | 6.53  | 50.74                        | 69.76  | 28.24  | 191.24  |
| Mali                  | 202.51  | 0.10 | 0.31 | <b>2.84(0.76,5.74)</b>    | 4.99  | 0.10 | 2.73  | 20.91  | 8.41  | <b>49.19(46.29,51.27)</b>    | 77.73  | 35.19  | 202.47  |
| Mauritania            | 46.50   | 0.05 | 0.21 | <b>1.41(0.64,2.42)</b>    | 1.53  | 0.03 | 0.81  | 5.20   | 1.57  | <b>13.42(12.4,14.18)</b>     | 15.51  | 6.76   | 46.42   |
| Mauritius             | 12.72   | 0.08 | 0.12 | 0.45                      | 1.72  | 0.04 | 0.58  | 2.67   | 0.13  | 3.98                         | 2.32   | 0.63   | 12.71   |
| Mozambique            | 312.55  | 0.24 | 0.34 | <b>2.21(0.54,4.73)</b>    | 8.99  | 0.21 | 4.50  | 47.27  | 11.73 | <b>73.66(71.14,75.33)</b>    | 113.73 | 49.69  | 312.42  |
| Namibia               | 25.41   | 0.06 | 0.16 | 1.15                      | 1.02  | 0.02 | 0.38  | 4.46   | 0.73  | 6.18                         | 7.96   | 3.29   | 25.28   |
| Niger                 | 242.07  | 0.08 | 0.19 | 0.25                      | 6.21  | 0.11 | 3.63  | 23.89  | 11.15 | 56.56                        | 93.50  | 46.49  | 242.05  |
| Nigeria               | 2061.40 | 3.22 | 5.87 | 34.15                     | 57.17 | 0.82 | 35.02 | 232.99 | 78.14 | 547.24                       | 737.18 | 329.61 | 2060.75 |
| Rwanda                | 129.52  | 0.17 | 1.45 | 2.24                      | 3.96  | 0.09 | 2.58  | 14.69  | 4.11  | 38.28                        | 43.54  | 18.42  | 129.47  |
| Sao Tome and Principe | 2.19    | 0.00 | 0.01 | 0.03                      | 0.07  | 0.00 | 0.04  | 0.26   | 0.07  | 0.59                         | 0.80   | 0.31   | 2.18    |
| Senegal               | 167.44  | 0.06 | 0.19 | 2.67                      | 5.25  | 0.11 | 2.70  | 18.13  | 5.78  | 46.84                        | 60.04  | 25.65  | 167.28  |
| Seychelles            | 0.98    | 0.01 | 0.01 | 0.12                      | 0.08  | 0.00 | 0.04  | 0.17   | 0.02  | 0.25                         | 0.21   | 0.08   | 0.98    |
| Sierra Leone          | 79.77   | 0.02 | 0.22 | 0.29                      | 2.41  | 0.05 | 1.24  | 9.67   | 2.66  | 24.25                        | 27.75  | 11.23  | 79.75   |
| South Africa          | 593.09  | 1.31 | 1.31 | <b>15.2(5.67,27.37)</b>   | 36.64 | 0.63 | 13.35 | 126.34 | 12.16 | <b>175.38(163.2,184.9)</b>   | 154.01 | 56.75  | 585.71  |
| South Sudan           | 111.94  | 0.11 | 2.35 | <b>1.09(0.17,2.43)</b>    | 3.64  | 0.10 | 2.03  | 12.02  | 3.92  | <b>30.74(29.39,31.66)</b>    | 39.27  | 16.68  | 111.91  |
| Swaziland             | 11.60   | 0.05 | 0.07 | 0.17                      | 0.53  | 0.01 | 0.12  | 2.80   | 0.31  | 2.25                         | 3.89   | 1.40   | 11.54   |
| Tanzania              | 597.34  | 0.36 | 1.10 | <b>22.74(19.62,26.89)</b> | 15.16 | 0.36 | 9.76  | 67.08  | 21.92 | <b>148.64(144.49,151.76)</b> | 215.34 | 94.89  | 597.34  |
| The Gambia            | 24.17   | 0.04 | 0.06 | 0.65                      | 0.61  | 0.01 | 0.33  | 2.65   | 0.93  | 6.22                         | 8.66   | 4.00   | 24.13   |
| Togo                  | 82.79   | 0.04 | 0.14 | 2.32                      | 2.45  | 0.04 | 1.39  | 10.01  | 2.74  | 23.06                        | 28.73  | 11.86  | 82.76   |

|          |                     |                |       |       |                              |         |       |        |         |        |                                |         |        |         |
|----------|---------------------|----------------|-------|-------|------------------------------|---------|-------|--------|---------|--------|--------------------------------|---------|--------|---------|
|          | Uganda              | 457.41         | 0.64  | 0.83  | <b>17.41(15.03,20.59)</b>    | 9.16    | 0.19  | 5.41   | 53.97   | 17.44  | <b>102.03(98.85,104.41)</b>    | 174.54  | 75.78  | 457.27  |
|          | Zambia              | 183.84         | 0.46  | 0.16  | 1.46                         | 4.09    | 0.09  | 2.11   | 26.10   | 6.65   | 45.66                          | 68.46   | 28.59  | 183.67  |
|          | Zimbabwe            | 148.63         | 0.32  | 0.96  | 1.48                         | 5.03    | 0.10  | 1.76   | 25.14   | 4.56   | 34.66                          | 54.15   | 20.47  | 148.54  |
| Americas | Subtotal            | 10181.19108.83 | 79.78 |       | <b>256.13(230.61,286.33)</b> | 1130.63 | 45.16 | 512.35 | 1277.47 | 148.97 | <b>3730.76(3700.56,3756.3)</b> | 2173.64 | 717.50 | 9567.54 |
|          | Antigua and Barbuda | 0.98           | 0.01  | 0.01  | 0.11                         | 0.09    | 0.00  | 0.05   | 0.15    | 0.02   | 0.27                           | 0.20    | 0.07   | 0.98    |
|          | Argentina           | 451.96         | 2.98  | 4.55  | <b>15.28(7.61,22.68)</b>     | 46.19   | 2.17  | 21.85  | 52.56   | 7.69   | <b>157.18(149.78,164.85)</b>   | 104.77  | 36.74  | 439.59  |
|          | Barbados            | 2.87           | 0.02  | 0.03  | <b>0.21(0.12,0.3)</b>        | 0.45    | 0.02  | 0.19   | 0.43    | 0.03   | <b>0.86(0.76,0.95)</b>         | 0.50    | 0.15   | 2.87    |
|          | Belize              | 3.98           | 0.01  | 0.03  | <b>0.12(0.04,0.21)</b>       | 0.20    | 0.01  | 0.10   | 0.56    | 0.08   | <b>1.38(1.29,1.46)</b>         | 1.11    | 0.38   | 3.94    |
|          | Bolivia             | 116.73         | 0.37  | 1.02  | 4.78                         | 7.51    | 0.42  | 4.17   | 12.48   | 2.54   | 38.71                          | 33.20   | 11.54  | 115.31  |
|          | Brazil              | 2125.59        | 26.11 | 10.49 | 60.57                        | 177.83  | 8.88  | 111.87 | 250.71  | 29.60  | 866.94                         | 440.94  | 141.67 | 1920.27 |
|          | Canada              | 377.42         | 4.63  | 1.41  | 21.91                        | 60.22   | 3.10  | 30.64  | 40.98   | 3.81   | 133.60                         | 57.62   | 19.52  | 374.82  |
|          | Chile               | 191.16         | 3.04  | 1.87  | 7.27                         | 21.34   | 0.99  | 10.90  | 22.77   | 2.38   | 72.63                          | 36.54   | 11.44  | 185.95  |
|          | Colombia            | 508.83         | 1.79  | 6.41  | 10.55                        | 41.41   | 1.79  | 23.76  | 58.42   | 7.57   | 206.24                         | 114.39  | 36.49  | 497.46  |
|          | Costa Rica          | 50.94          | 0.32  | 0.05  | 1.81                         | 4.95    | 0.20  | 2.52   | 6.84    | 0.71   | 19.80                          | 10.33   | 3.41   | 49.78   |
|          | Cuba                | 113.27         | 1.81  | 1.19  | 6.18                         | 14.97   | 0.91  | 8.20   | 15.97   | 1.15   | 39.43                          | 17.91   | 5.55   | 113.19  |
|          | Dominica            | 0.68           | 0.01  | 0.00  | 0.04                         | 0.00    | 0.00  | 0.03   | 0.01    | 0.01   | 0.30                           | 0.22    | 0.07   | 0.68    |
|          | Dominican Republic  | 108.48         | 0.32  | 1.03  | 3.55                         | 7.38    | 0.37  | 4.30   | 13.18   | 2.12   | 38.37                          | 28.07   | 9.80   | 101.21  |
|          | Ecuador             | 176.43         | 0.80  | 0.83  | 5.60                         | 11.65   | 0.59  | 7.17   | 19.39   | 3.48   | 65.35                          | 45.29   | 16.28  | 97.58   |
|          | El Salvador         | 64.86          | 0.22  | 0.76  | 1.70                         | 5.28    | 0.23  | 2.31   | 8.69    | 1.18   | 22.27                          | 16.56   | 5.64   | 64.51   |
|          | Grenada             | 1.13           | 0.01  | 0.01  | 0.13                         | 0.11    | 0.00  | 0.05   | 0.17    | 0.02   | 0.29                           | 0.24    | 0.09   | 1.12    |
|          | Guatemala           | 179.16         | 0.08  | 0.57  | <b>4.46(2.95,5.87)</b>       | 8.83    | 0.33  | 3.80   | 22.33   | 4.40   | <b>58.04(56.63,59.56)</b>      | 56.04   | 20.28  | 178.04  |
|          | Guyana              | 7.87           | 0.01  | 0.06  | 0.22                         | 0.57    | 0.02  | 0.27   | 1.19    | 0.16   | 2.57                           | 2.08    | 0.72   | 7.82    |
|          | Haiti               | 114.03         | 0.10  | 0.17  | <b>4.46(1.62,8.79)</b>       | 5.84    | 0.18  | 2.80   | 15.58   | 2.78   | <b>35.97(31.64,38.81)</b>      | 33.94   | 12.20  | 113.93  |
|          | Honduras            | 99.05          | 0.10  | 0.37  | <b>1.49(0.57,2.66)</b>       | 4.80    | 0.18  | 2.32   | 12.35   | 2.14   | <b>36.11(34.94,37.03)</b>      | 29.23   | 9.96   | 98.05   |
|          | Jamaica             | 29.61          | 0.06  | 0.15  | 1.65                         | 2.66    | 0.11  | 1.16   | 4.45    | 0.48   | 9.99                           | 6.66    | 2.24   | 29.52   |
|          | Mexico              | 1289.33        | 6.16  | 7.66  | <b>49.07(42.36,58.04)</b>    | 104.92  | 3.03  | 36.97  | 210.48  | 22.69  | <b>417.23(408.26,423.95)</b>   | 323.13  | 107.98 | 1279.71 |
|          | Nicaragua           | 66.25          | 0.17  | 0.24  | 1.14                         | 3.77    | 0.13  | 1.85   | 8.52    | 1.37   | 24.36                          | 18.25   | 6.45   | 66.20   |
|          | Panama              | 43.15          | 0.20  | 0.21  | 2.77                         | 3.43    | 0.16  | 1.70   | 5.52    | 0.82   | 13.85                          | 10.69   | 3.82   | 41.76   |

|                       |                                  |         |       |       |                              |        |       |        |         |        |                                 |         |        |         |
|-----------------------|----------------------------------|---------|-------|-------|------------------------------|--------|-------|--------|---------|--------|---------------------------------|---------|--------|---------|
|                       | Paraguay                         | 71.33   | 0.22  | 0.52  | <b>2.71(2.34,3.21)</b>       | 4.57   | 0.17  | 2.32   | 8.38    | 1.47   | <b>24.79(24.29,25.16)</b>       | 19.33   | 6.85   | 70.66   |
|                       | Peru                             | 329.72  | 1.23  | 2.62  | 13.24                        | 23.26  | 1.41  | 16.58  | 35.84   | 5.92   | 127.88                          | 74.12   | 27.63  | 320.52  |
|                       | Saint Kitts and Nevis            | 0.51    | 0.00  | 0.00  | 0.04                         | 0.00   | 0.01  | 0.07   | 0.01    | 0.01   | 0.23                            | 0.11    | 0.03   | 0.51    |
|                       | Saint Lucia                      | 1.84    | 0.01  | 0.01  | 0.14                         | 0.18   | 0.01  | 0.08   | 0.29    | 0.02   | 0.65                            | 0.34    | 0.11   | 1.84    |
|                       | Saint Vincent and the Grenadines | 1.11    | 0.01  | 0.01  | 0.07                         | 0.11   | 0.00  | 0.05   | 0.18    | 0.02   | 0.34                            | 0.24    | 0.07   | 1.11    |
|                       | Suriname                         | 5.87    | 0.02  | 0.02  | <b>0.62(0.16,1.1)</b>        | 0.42   | 0.01  | 0.20   | 0.90    | 0.11   | <b>1.58(1.1,2.04)</b>           | 1.47    | 0.51   | 5.81    |
|                       | The Bahamas                      | 3.93    | 0.03  | 0.05  | 0.37                         | 0.30   | 0.01  | 0.17   | 0.62    | 0.05   | 1.22                            | 0.86    | 0.26   | 3.86    |
|                       | Trinidad and Tobago              | 13.99   | 0.12  | 0.11  | <b>0.8(0.16,1.84)</b>        | 1.64   | 0.05  | 0.68   | 2.39    | 0.18   | <b>4.49(3.45,5.13)</b>          | 2.68    | 0.86   | 13.94   |
|                       | United States                    | 3310.03 | 56.80 | 32.35 | 13.11                        | 538.21 | 18.73 | 200.24 | 404.50  | 38.40  | 1211.22                         | 603.36  | 193.10 | 3046.89 |
|                       | Uruguay                          | 34.74   | 0.24  | 0.49  | 1.76                         | 4.79   | 0.26  | 1.97   | 4.07    | 0.48   | 11.40                           | 6.93    | 2.33   | 34.70   |
|                       | Venezuela                        | 284.36  | 0.82  | 4.48  | <b>18.2(13.97,22.92)</b>     | 22.75  | 0.68  | 11.01  | 36.56   | 5.08   | <b>85.22(80.51,89.45)</b>       | 76.29   | 23.26  | 283.41  |
| Eastern Mediterranean | Subtotal                         | 7257.21 | 17.72 | 60.71 | <b>240.14(199.35,295.68)</b> | 358.51 | 8.41  | 158.03 | 1020.27 | 186.81 | <b>2316.26(2260.74,2357.06)</b> | 2062.76 | 827.68 | 6725.50 |
|                       | Afghanistan                      | 389.28  | 0.18  | 4.80  | <b>22.42(16.56,30.44)</b>    | 12.00  | 0.16  | 4.28   | 60.19   | 12.65  | <b>80.41(72.39,86.26)</b>       | 139.08  | 53.12  | 266.24  |
|                       | Bahrain                          | 17.02   | 0.06  | 0.19  | 0.54                         | 0.65   | 0.01  | 0.25   | 2.98    | 0.24   | 8.28                            | 2.78    | 1.05   | 16.18   |
|                       | Djibouti                         | 9.88    | 0.01  | 0.13  | <b>0.3(0.08,0.64)</b>        | 0.46   | 0.01  | 0.26   | 1.30    | 0.21   | <b>3.58(3.25,3.8)</b>           | 2.64    | 0.97   | 9.82    |
|                       | Egypt                            | 1023.34 | 2.43  | 13.36 | 34.95                        | 60.28  | 1.14  | 22.75  | 160.09  | 26.99  | 292.62                          | 287.37  | 121.36 | 1022.25 |
|                       | Iran                             | 839.93  | 1.70  | 9.33  | 52.84                        | 58.77  | 1.53  | 26.16  | 122.06  | 15.78  | 299.62                          | 177.87  | 74.28  | 658.40  |
|                       | Iraq                             | 402.23  | 1.11  | 2.53  | <b>19.17(6.94,33.11)</b>     | 14.77  | 0.28  | 5.50   | 54.01   | 11.69  | <b>109.15(95.21,121.38)</b>     | 131.94  | 52.09  | 397.24  |
|                       | Jordan                           | 102.03  | 0.52  | 1.66  | <b>2.64(1.17,4.4)</b>        | 4.44   | 0.10  | 1.67   | 14.39   | 2.24   | <b>32.59(30.84,34.07)</b>       | 31.55   | 10.22  | 100.94  |
|                       | Kuwait                           | 42.71   | 0.43  | 0.43  | 0.84                         | 1.78   | 0.02  | 0.99   | 7.77    | 0.60   | 18.90                           | 8.13    | 2.82   | 41.39   |
|                       | Lebanon                          | 68.25   | 0.26  | 0.80  | 1.60                         | 5.52   | 0.16  | 1.97   | 11.09   | 1.20   | 23.98                           | 16.23   | 5.46   | 67.31   |
|                       | Libya                            | 68.71   | 0.59  | 0.17  | <b>2.62(2.26,3.09)</b>       | 3.46   | 0.08  | 1.21   | 11.97   | 1.29   | <b>23.89(23.41,24.25)</b>       | 17.42   | 6.01   | 65.15   |
|                       | Morocco                          | 369.11  | 0.78  | 3.11  | 6.32                         | 30.45  | 0.70  | 12.60  | 57.36   | 6.99   | 128.78                          | 89.89   | 32.12  | 366.54  |
|                       | Oman                             | 51.07   | 0.32  | 0.47  | <b>3.79(1.26,6.59)</b>       | 1.54   | 0.03  | 0.60   | 8.14    | 0.98   | <b>22.17(19.37,24.7)</b>        | 8.64    | 4.39   | 49.88   |
|                       | Pakistan                         | 2208.92 | 3.64  | 12.90 | 51.67                        | 97.10  | 2.67  | 49.08  | 271.55  | 62.40  | 704.77                          | 679.07  | 274.07 | 2006.69 |
|                       | Qatar                            | 28.81   | 0.28  | 0.22  | 0.68                         | 0.73   | 0.01  | 0.30   | 5.16    | 0.27   | 16.36                           | 3.49    | 1.32   | 27.47   |
|                       | Saudi Arabia                     | 348.14  | 2.82  | 2.52  | 8.30                         | 14.05  | 0.27  | 6.05   | 57.13   | 6.20   | 146.26                          | 75.37   | 29.17  | 344.63  |

|        |                        |         |        |       |                              |         |       |        |         |        |                                 |         |        |         |
|--------|------------------------|---------|--------|-------|------------------------------|---------|-------|--------|---------|--------|---------------------------------|---------|--------|---------|
|        | Somalia                | 158.93  | 0.02   | 0.26  | <b>9.88(0.36,28.5)</b>       | 4.50    | 0.11  | 2.64   | 15.74   | 6.64   | <b>31.71(13.1,41.23)</b>        | 59.97   | 27.48  | 158.89  |
|        | Sudan                  | 438.49  | 0.42   | 1.74  | <b>9.37(4.87,13.4)</b>       | 16.93   | 0.36  | 7.57   | 59.59   | 14.11  | <b>121.69(117.66,126.19)</b>    | 146.90  | 59.82  | 438.35  |
|        | Syria                  | 175.01  | 0.49   | 2.67  | <b>7.34(3.24,12.9)</b>       | 8.91    | 0.24  | 4.03   | 24.72   | 4.15   | <b>56.47(50.91,60.58)</b>       | 47.51   | 18.47  | 174.94  |
|        | Tunisia                | 118.19  | 0.45   | 0.63  | 3.68                         | 10.81   | 0.33  | 4.73   | 17.25   | 2.08   | 43.23                           | 25.26   | 9.74   | 117.47  |
|        | United Arab Emirates   | 98.90   | 0.82   | 0.85  | 0.66                         | 2.18    | 0.02  | 0.91   | 19.09   | 1.02   | 55.60                           | 12.91   | 4.85   | 97.48   |
|        | Yemen                  | 298.26  | 0.39   | 1.94  | 0.53                         | 9.18    | 0.18  | 4.48   | 38.69   | 9.08   | 96.20                           | 98.74   | 38.87  | 298.24  |
| Europe | Subtotal               | 9328.89 | 107.62 | 84.46 | <b>437.78(430.42,447.89)</b> | 1448.16 | 72.78 | 615.20 | 1277.75 | 110.43 | <b>3029.72(3019.62,3037.09)</b> | 1595.61 | 549.43 | 8906.12 |
|        | Albania                | 28.78   | 0.14   | 0.19  | 4.32                         | 3.99    | 0.16  | 1.94   | 3.61    | 0.34   | 7.35                            | 5.11    | 1.63   | 28.54   |
|        | Andorra                | 0.86    | 0.01   | 0.00  | 0.03                         | 0.00    | 0.04  | 0.17   | 0.01    | 0.01   | 0.43                            | 0.13    | 0.03   | 0.92    |
|        | Armenia                | 29.63   | 0.31   | 0.49  | 0.86                         | 3.84    | 0.14  | 1.49   | 4.71    | 0.41   | 9.73                            | 5.63    | 2.02   | 28.56   |
|        | Austria                | 90.06   | 0.49   | 0.50  | 4.84                         | 15.82   | 0.79  | 6.51   | 11.76   | 0.87   | 31.45                           | 12.62   | 4.42   | 88.54   |
|        | Azerbaijan             | 101.39  | 1.00   | 0.82  | <b>2.37(1.77,2.88)</b>       | 8.02    | 0.21  | 3.57   | 16.60   | 1.42   | <b>38.01(37.5,38.61)</b>        | 21.24   | 8.14   | 100.74  |
|        | Belarus                | 94.49   | 1.53   | 1.86  | 5.31                         | 14.47   | 0.62  | 6.28   | 14.65   | 0.94   | 28.69                           | 14.76   | 5.38   | 93.43   |
|        | Belgium                | 115.90  | 2.61   | 0.70  | 4.65                         | 20.15   | 1.09  | 8.43   | 14.43   | 1.19   | 37.16                           | 19.24   | 6.25   | 110.89  |
|        | Bosnia and Herzegovina | 32.81   | 0.26   | 0.28  | 1.10                         | 6.06    | 0.19  | 2.05   | 5.10    | 0.27   | 11.28                           | 4.92    | 1.31   | 32.18   |
|        | Bulgaria               | 69.48   | 0.61   | 0.55  | 3.90                         | 14.05   | 0.52  | 5.02   | 10.01   | 0.62   | 21.27                           | 9.85    | 3.07   | 68.73   |
|        | Croatia                | 41.05   | 0.46   | 0.39  | 2.21                         | 8.25    | 0.37  | 3.00   | 5.60    | 0.37   | 12.68                           | 5.92    | 1.81   | 40.38   |
|        | Cyprus                 | 12.07   | 0.09   | 0.23  | 0.71                         | 1.56    | 0.07  | 0.76   | 1.41    | 0.13   | 4.45                            | 2.03    | 0.64   | 12.01   |
|        | Czech Republic         | 107.09  | 1.34   | 0.63  | 5.87                         | 20.63   | 0.66  | 6.72   | 15.94   | 1.15   | 32.94                           | 15.71   | 5.50   | 102.94  |
|        | Denmark                | 57.92   | 0.83   | 0.26  | 2.51                         | 10.69   | 0.43  | 4.02   | 7.72    | 0.61   | 18.37                           | 9.43    | 3.05   | 57.02   |
|        | Estonia                | 13.27   | 0.21   | 0.10  | 0.78                         | 2.57    | 0.12  | 0.87   | 2.03    | 0.14   | 3.71                            | 2.05    | 0.68   | 13.20   |
|        | Finland                | 55.41   | 1.03   | 0.32  | 2.36                         | 10.69   | 0.55  | 4.82   | 6.71    | 0.48   | 17.05                           | 8.80    | 2.60   | 55.23   |
|        | France                 | 652.74  | 9.62   | 4.79  | 25.86                        | 111.96  | 7.62  | 55.62  | 67.97   | 7.38   | 211.72                          | 114.56  | 35.64  | 616.28  |
|        | Georgia                | 39.89   | 0.47   | 0.68  | 1.13                         | 6.14    | 0.23  | 2.20   | 6.52    | 0.54   | 12.06                           | 7.27    | 2.64   | 39.28   |
|        | Germany                | 837.84  | 14.65  | 4.96  | 39.92                        | 162.77  | 9.90  | 67.24  | 102.89  | 7.96   | 273.14                          | 114.35  | 40.06  | 800.12  |
|        | Greece                 | 104.23  | 0.95   | 2.01  | 4.78                         | 19.49   | 1.48  | 9.02   | 12.13   | 0.84   | 34.54                           | 14.95   | 4.04   | 103.66  |
|        | Hungary                | 96.60   | 1.00   | 0.76  | 5.49                         | 18.85   | 0.64  | 6.35   | 14.12   | 0.93   | 30.15                           | 13.77   | 4.55   | 94.78   |
|        | Iceland                | 3.41    | 0.07   | 0.01  | 0.23                         | 0.48    | 0.02  | 0.23   | 0.42    | 0.04   | 1.05                            | 0.65    | 0.20   | 3.35    |

|                    |         |       |       |                          |        |      |       |        |       |                           |        |       |         |
|--------------------|---------|-------|-------|--------------------------|--------|------|-------|--------|-------|---------------------------|--------|-------|---------|
| Ireland            | 49.38   | 0.96  | 0.24  | 2.74                     | 6.54   | 0.26 | 2.90  | 6.62   | 0.62  | 15.52                     | 9.92   | 3.08  | 47.79   |
| Israel             | 86.56   | 0.43  | 2.06  | 3.32                     | 9.23   | 0.46 | 4.55  | 8.49   | 1.80  | 26.18                     | 21.67  | 8.36  | 83.37   |
| Italy              | 604.62  | 5.88  | 6.47  | 24.27                    | 116.28 | 8.72 | 55.42 | 69.40  | 4.41  | 209.14                    | 81.71  | 22.92 | 435.65  |
| Kazakhstan         | 187.77  | 2.12  | 0.79  | <b>12.24(9.42,17.29)</b> | 15.39  | 0.51 | 7.05  | 25.49  | 4.09  | <b>55.77(50.72,58.59)</b> | 45.38  | 18.95 | 186.21  |
| Kyrgyzstan         | 65.24   | 0.53  | 0.11  | 3.69                     | 3.26   | 0.10 | 1.92  | 8.32   | 1.77  | 20.07                     | 18.00  | 7.46  | 64.61   |
| Latvia             | 18.86   | 0.15  | 0.15  | 1.16                     | 3.73   | 0.16 | 1.31  | 2.87   | 0.19  | 5.28                      | 2.74   | 1.12  | 18.78   |
| Lithuania          | 27.22   | 0.44  | 0.42  | 1.62                     | 5.35   | 0.27 | 1.86  | 4.23   | 0.27  | 7.46                      | 3.86   | 1.43  | 26.98   |
| Luxembourg         | 6.26    | 0.10  | 0.04  | <b>0.74(0.23,1.76)</b>   | 0.89   | 0.04 | 0.33  | 1.01   | 0.06  | <b>1.79(0.77,2.3)</b>     | 0.95   | 0.33  | 5.92    |
| Macedonia          | 20.83   | 0.14  | 0.28  | 0.89                     | 3.01   | 0.09 | 1.22  | 3.10   | 0.23  | 7.41                      | 3.38   | 1.10  | 20.44   |
| Malta              | 4.42    | 0.05  | 0.04  | 0.28                     | 0.86   | 0.03 | 0.35  | 0.57   | 0.04  | 1.37                      | 0.60   | 0.21  | 4.35    |
| Moldova            | 40.34   | 0.33  | 0.09  | 0.69                     | 5.05   | 0.16 | 2.41  | 6.87   | 0.41  | 16.14                     | 6.20   | 1.99  | 39.52   |
| Monaco             | 0.31    | 0.01  | 0.00  | 0.01                     | 0.00   | 0.04 | 0.09  | 0.00   | 0.00  | 0.11                      | 0.03   | 0.01  | 0.32    |
| Montenegro         | 6.28    | 0.05  | 0.17  | <b>0.46(0.36,0.55)</b>   | 0.97   | 0.03 | 0.38  | 0.86   | 0.07  | <b>1.79(1.7,1.89)</b>     | 1.12   | 0.36  | 6.05    |
| Netherlands        | 171.35  | 2.53  | 0.91  | 7.51                     | 30.88  | 1.40 | 13.29 | 22.13  | 1.66  | 54.98                     | 27.58  | 8.47  | 167.25  |
| Norway             | 54.21   | 1.15  | 0.41  | 2.34                     | 8.33   | 0.40 | 3.89  | 6.69   | 0.56  | 18.29                     | 9.20   | 2.96  | 53.98   |
| Poland             | 378.47  | 3.51  | 2.91  | 15.78                    | 68.29  | 2.90 | 26.98 | 52.25  | 3.86  | 129.12                    | 54.35  | 18.52 | 373.00  |
| Portugal           | 101.97  | 1.23  | 1.02  | 5.06                     | 20.38  | 1.18 | 8.38  | 14.26  | 0.87  | 31.61                     | 14.03  | 3.94  | 100.17  |
| Romania            | 192.38  | 1.99  | 1.73  | 9.09                     | 34.09  | 1.58 | 14.23 | 26.12  | 1.85  | 62.92                     | 29.53  | 9.25  | 189.34  |
| Russian Federation | 1459.34 | 17.94 | 22.11 | 99.87                    | 230.51 | 8.62 | 87.94 | 235.76 | 16.78 | 411.20                    | 237.65 | 90.97 | 1441.38 |
| San Marino         | 0.34    | 0.00  | 0.00  | 0.01                     | 0.00   | 0.02 | 0.07  | 0.00   | 0.00  | 0.17                      | 0.05   | 0.02  | 0.33    |
| Serbia             | 87.37   | 0.80  | 0.60  | 2.64                     | 15.98  | 0.51 | 5.64  | 12.07  | 0.80  | 30.19                     | 14.00  | 4.14  | 86.75   |
| Slovakia           | 54.60   | 0.20  | 0.38  | 3.03                     | 8.85   | 0.29 | 3.60  | 8.02   | 0.58  | 18.84                     | 8.02   | 2.79  | 53.84   |
| Slovenia           | 20.79   | 0.27  | 0.15  | 1.04                     | 3.99   | 0.19 | 1.59  | 2.80   | 0.20  | 6.59                      | 2.97   | 1.00  | 20.34   |
| Spain              | 467.55  | 4.49  | 3.64  | 24.97                    | 78.57  | 5.53 | 38.70 | 58.60  | 3.69  | 162.93                    | 67.08  | 19.36 | 432.75  |
| Sweden             | 100.99  | 1.60  | 0.51  | 4.23                     | 18.30  | 0.87 | 7.03  | 13.20  | 1.15  | 31.70                     | 16.51  | 5.90  | 83.27   |
| Switzerland        | 86.55   | 1.89  | 0.40  | 3.91                     | 14.28  | 0.81 | 6.80  | 10.61  | 0.87  | 30.22                     | 12.31  | 4.46  | 77.60   |
| Tajikistan         | 95.38   | 0.65  | 0.17  | 1.54                     | 3.52   | 0.08 | 1.90  | 12.12  | 2.93  | 30.22                     | 28.94  | 13.31 | 95.26   |
| Turkey             | 843.39  | 3.85  | 9.25  | 24.32                    | 77.07  | 2.36 | 30.78 | 123.46 | 13.52 | 299.66                    | 195.25 | 63.87 | 839.45  |
| Turkmenistan       | 60.31   | 0.40  | 0.67  | <b>4.35(1.99,6.76)</b>   | 3.21   | 0.09 | 1.59  | 8.73   | 1.44  | <b>17.12(14.71,19.48)</b> | 16.21  | 6.51  | 60.31   |

|                 |                                |                |       |        |                              |         |        |         |         |        |                                |         |         |          |
|-----------------|--------------------------------|----------------|-------|--------|------------------------------|---------|--------|---------|---------|--------|--------------------------------|---------|---------|----------|
|                 | Ukraine                        | 437.34         | 4.22  | 4.56   | 16.21                        | 71.13   | 3.06   | 29.21   | 72.20   | 3.80   | 145.97                         | 66.25   | 20.73   | 432.65   |
|                 | United Kingdom                 | 678.86         | 7.46  | 2.97   | 32.23                        | 111.35  | 5.73   | 48.60   | 86.37   | 7.47   | 225.11                         | 113.06  | 38.51   | 633.68   |
|                 | Uzbekistan                     | 334.69         | 4.57  | 0.68   | <b>8.31(7.34,9.33)</b>       | 18.39   | 0.44   | 8.88    | 50.19   | 7.80   | <b>117.62(116.6,118.59)</b>    | 84.07   | 33.74   | 334.00   |
| South-East Asia | Subtotal                       | 20213.8752.48  |       | 104.42 | <b>191.42(162.14,225.34)</b> | 1301.78 | 44.45  | 745.89  | 3039.55 | 355.94 | <b>7775.32(7741.41,7804.6)</b> | 4989.18 | 1613.47 | 18433.27 |
|                 | Bangladesh                     | 1646.89        | 1.64  | 4.77   | <b>41.47(17.85,69.69)</b>    | 80.17   | 3.65   | 47.27   | 190.36  | 29.95  | <b>667.24(639.02,690.86)</b>   | 438.65  | 141.73  | 1642.69  |
|                 | Bhutan                         | 7.72           | 0.02  | 0.06   | 0.12                         | 0.42    | 0.02   | 0.25    | 0.89    | 0.13   | 3.27                           | 1.91    | 0.63    | 7.71     |
|                 | India                          | 13800.0435.66  |       | 49.57  | 2.27                         | 861.52  | 28.85  | 505.74  | 2108.30 | 246.43 | 5436.48                        | 3426.54 | 1098.70 | 12030.90 |
|                 | Indonesia                      | 2735.24        | 7.77  | 12.66  | <b>72.25(66.59,77.95)</b>    | 177.28  | 4.71   | 93.26   | 429.48  | 49.43  | <b>978.83(973.14,984.49)</b>   | 677.88  | 231.68  | 2730.86  |
|                 | Maldives                       | 5.41           | 0.06  | 0.10   | 0.57                         | 0.19    | 0.01   | 0.11    | 0.78    | 0.08   | 2.22                           | 0.93    | 0.35    | 5.29     |
|                 | Myanmar                        | 544.10         | 0.91  | 6.06   | 18.75                        | 35.91   | 0.78   | 17.74   | 88.24   | 9.55   | 184.47                         | 137.69  | 44.00   | 543.48   |
|                 | Nepal                          | 291.37         | 1.12  | 1.79   | 0.01                         | 16.04   | 0.45   | 8.72    | 34.97   | 5.79   | 111.63                         | 84.47   | 26.36   | 289.42   |
|                 | North Korea                    | 257.79         | 2.10  | 18.80  | 1.58                         | 24.93   | 0.92   | 12.98   | 42.53   | 3.58   | 83.33                          | 50.04   | 17.01   | 257.79   |
|                 | Sri Lanka                      | 214.13         | 0.68  | 3.93   | 14.53                        | 23.38   | 0.67   | 11.15   | 31.84   | 3.39   | 59.37                          | 48.93   | 16.27   | 213.99   |
|                 | Thailand                       | 698.00         | 2.49  | 6.66   | 39.78                        | 81.38   | 4.37   | 48.38   | 110.51  | 7.22   | 244.44                         | 117.77  | 35.01   | 697.96   |
|                 | Timor-Leste                    | 13.18          | 0.03  | 0.02   | 0.09                         | 0.56    | 0.02   | 0.29    | 1.65    | 0.39   | 4.04                           | 4.37    | 1.73    | 13.18    |
| Western Pacific | Subtotal                       | 19317.43106.11 |       | 107.14 | <b>374.56(374.14,375.03)</b> | 1978.98 | 107.50 | 1320.01 | 2790.82 | 227.47 | <b>7715.46(7715,7715.87)</b>   | 3437.80 | 1151.61 | 18966.36 |
|                 | Australia                      | 255.00         | 4.14  | 1.13   | 16.87                        | 35.02   | 1.99   | 18.52   | 26.28   | 3.21   | 85.39                          | 46.10   | 16.34   | 254.72   |
|                 | Brunei                         | 4.37           | 0.03  | 0.12   | <b>0.17(0.14,0.2)</b>        | 0.28    | 0.01   | 0.13    | 0.73    | 0.07   | <b>1.57(1.54,1.59)</b>         | 0.96    | 0.31    | 4.37     |
|                 | Cambodia                       | 167.19         | 0.15  | 2.55   | 2.31                         | 7.81    | 0.20   | 4.64    | 22.98   | 3.76   | 59.24                          | 46.26   | 17.30   | 167.19   |
|                 | China                          | 14393.2466.81  |       | 46.95  | 145.80                       | 1402.43 | 70.37  | 1024.96 | 2114.19 | 156.89 | 6104.69                        | 2445.00 | 815.15  | 14046.88 |
|                 | Cook Islands                   | 0.09           | 0.00  | 0.00   | 0.00                         | 0.00    | 0.00   | 0.01    | 0.00    | 0.00   | 0.04                           | 0.02    | 0.01    | 0.13     |
|                 | Federated States of Micronesia | 1.15           | 0.00  | 0.00   | <b>0.09(0.03,0.16)</b>       | 0.07    | 0.00   | 0.02    | 0.24    | 0.03   | <b>0.25(0.18,0.32)</b>         | 0.33    | 0.12    | 1.15     |
|                 | Fiji                           | 8.96           | 0.04  | 0.08   | 0.35                         | 0.69    | 0.01   | 0.16    | 2.08    | 0.19   | 2.17                           | 2.32    | 0.87    | 8.96     |
|                 | Japan                          | 1264.76        | 18.42 | 5.49   | 79.00                        | 275.31  | 24.05  | 134.76  | 146.92  | 9.36   | 364.56                         | 160.35  | 46.55   | 1262.42  |
|                 | Kiribati                       | 1.19           | 0.00  | 0.01   | <b>0.05(0.04,0.05)</b>       | 0.06    | 0.00   | 0.02    | 0.27    | 0.03   | <b>0.26(0.25,0.26)</b>         | 0.36    | 0.15    | 1.24     |
|                 | Laos                           | 72.76          | 0.10  | 0.03   | 0.62                         | 3.22    | 0.08   | 1.65    | 10.41   | 1.71   | 25.86                          | 21.32   | 7.76    | 72.76    |
|                 | Malaysia                       | 323.66         | 1.62  | 2.66   | 4.50                         | 22.67   | 0.73   | 12.08   | 49.29   | 5.42   | 125.69                         | 73.10   | 25.88   | 323.26   |

|                  |         |      |       |                        |       |      |       |        |       |                           |        |        |         |
|------------------|---------|------|-------|------------------------|-------|------|-------|--------|-------|---------------------------|--------|--------|---------|
| Marshall Islands | 0.78    | 0.00 | 0.00  | 0.03                   | 0.00  | 0.00 | 0.05  | 0.02   | 0.02  | 0.32                      | 0.24   | 0.08   | 0.78    |
| Mongolia         | 32.78   | 0.22 | 0.18  | 1.27                   | 1.52  | 0.04 | 0.83  | 4.47   | 0.79  | 11.42                     | 8.34   | 3.70   | 32.78   |
| Nauru            | 0.10    | 0.00 | 0.00  | 0.00                   | 0.00  | 0.00 | 0.01  | 0.00   | 0.00  | 0.05                      | 0.03   | 0.01   | 0.10    |
| New Zealand      | 48.22   | 0.77 | 0.21  | 2.44                   | 6.69  | 0.35 | 3.67  | 4.92   | 0.58  | 16.56                     | 9.08   | 2.95   | 48.21   |
| Niue             | 0.01    | 0.00 | 0.00  | 0.00                   | 0.00  | 0.00 | 0.00  | 0.00   | 0.00  | 0.01                      | 0.00   | 0.00   | 0.01    |
| Palau            | 0.22    | 0.00 | 0.00  | 0.02                   | 0.00  | 0.00 | 0.02  | 0.01   | 0.00  | 0.10                      | 0.05   | 0.01   | 0.22    |
| Papua New Guinea | 89.47   | 0.05 | 0.09  | <b>0.53(0.23,0.86)</b> | 3.95  | 0.05 | 1.37  | 17.31  | 2.42  | <b>25.29(24.96,25.58)</b> | 27.73  | 10.69  | 89.46   |
| Philippines      | 1095.81 | 6.07 | 3.23  | 39.17                  | 62.84 | 1.67 | 29.82 | 162.55 | 22.51 | 352.25                    | 312.41 | 103.30 | 1091.85 |
| Samoa            | 1.98    | 0.01 | 0.01  | 0.06                   | 0.12  | 0.00 | 0.04  | 0.33   | 0.05  | 0.49                      | 0.63   | 0.26   | 1.98    |
| Singapore        | 58.50   | 0.50 | 0.91  | 8.25                   | 7.14  | 0.29 | 4.82  | 8.70   | 0.51  | 17.83                     | 7.03   | 2.54   | 57.92   |
| Solomon Islands  | 6.87    | 0.02 | 0.01  | 0.06                   | 0.28  | 0.01 | 0.10  | 1.16   | 0.22  | 1.74                      | 2.28   | 1.00   | 6.87    |
| South Korea      | 512.69  | 4.95 | 37.98 | 24.41                  | 72.75 | 3.95 | 42.01 | 72.31  | 3.28  | 164.59                    | 67.85  | 18.61  | 512.42  |
| Tonga            | 1.06    | 0.00 | 0.01  | 0.02                   | 0.07  | 0.00 | 0.02  | 0.20   | 0.03  | 0.26                      | 0.34   | 0.12   | 1.06    |
| Tuvalu           | 0.11    | 0.00 | 0.00  | 0.00                   | 0.00  | 0.00 | 0.01  | 0.00   | 0.00  | 0.05                      | 0.03   | 0.01   | 0.22    |
| Vanuatu          | 3.07    | 0.00 | 0.01  | <b>0.12(0.1,0.14)</b>  | 0.13  | 0.00 | 0.04  | 0.55   | 0.09  | <b>0.72(0.7,0.74)</b>     | 0.99   | 0.41   | 6.03    |
| Vietnam          | 973.39  | 2.21 | 5.48  | 48.42                  | 75.93 | 3.70 | 40.25 | 144.90 | 16.30 | 354.06                    | 204.65 | 77.48  | 973.37  |

Note that imputed data were heighted and all individuals were considered in 194 countries.

**Table. S5. Estimates of target population sizes for COVID-19 vaccination in 194 countries, considering the fraction of the population willing to accept COVID-19 vaccination in each WHO region.**

| Goals of vaccination <sup>a,b</sup>                                      | All (mean, 95%CI)              | WHO region (millions; mean, 95%CI) |                             |                             |                             |                               |                            |
|--------------------------------------------------------------------------|--------------------------------|------------------------------------|-----------------------------|-----------------------------|-----------------------------|-------------------------------|----------------------------|
|                                                                          |                                | Africa                             | Americas                    | Eastern Mediterranean       | Europe                      | Western Pacific               | South-East Asia            |
| <b>Maintaining essential core societal services</b>                      |                                |                                    |                             |                             |                             |                               |                            |
| Subtotal                                                                 | 181.3 (157.1, 205.6)           | 13.3 (8.3, 18.3)                   | 32.0 (29.8, 34.3)           | 24.4 (17, 31.9)             | 42.5 (39.1, 45.9)           | 43.0 (38, 48.1)               | 25.9 (24.8, 27.0)          |
| Healthcare workers                                                       | 28.9 (26.0, 31.8)              | 0.7 (0.5, 1.0)                     | 7.8 (7.3, 8.4)              | 1.4 (1.0, 1.8)              | 7.3 (6.7, 7.9)              | 7.8 (6.9, 8.7)                | 3.9 (3.7, 4.0)             |
| Police and military                                                      | 33.4 (29.2, 37.5)              | 1.7 (1.0, 2.3)                     | 5.8 (5.4, 6.2)              | 4.7 (3.3, 6.1)              | 5.7 (5.2, 6.1)              | 7.8 (6.9, 8.8)                | 7.7 (7.4, 8.1)             |
| Other essential workers                                                  | 118.9 (101.8, 136.1)           | 10.8 (6.7, 14.9)                   | 18.4 (17.2, 19.7)           | 18.4 (12.8, 24)             | 29.6 (27.2, 31.9)           | 27.5 (24.3, 30.7)             | 14.2 (13.6, 14.8)          |
| <b>Reducing severe COVID-19 disease</b>                                  |                                |                                    |                             |                             |                             |                               |                            |
| Subtotal                                                                 | 1515.7 (1335.5, 1697.7)        | 107.9 (67.3, 148.7)                | 217.4 (202.3, 232.8)        | 121.2 (84.3, 158.2)         | 233.3 (214.7, 252)          | 458.4 (405.2, 512.2)          | 377.6 (361.9, 393.8)       |
| People aged ≥60 years with at least one underlying condition             | 467.3 (417.5, 517.5)           | 18.7 (11.7, 25.8)                  | 81.4 (75.8, 87.2)           | 27.5 (19.1, 35.9)           | 97.7 (89.9, 105.6)          | 144.9 (128.0, 161.9)          | 97.0 (93.0, 101.2)         |
| People aged ≥80 years without any underlying conditions                  | 20.4 (18.4, 22.4)              | 0.4 (0.3, 0.6)                     | 3.2 (3.0, 3.5)              | 0.6 (0.4, 0.8)              | 4.9 (4.5, 5.3)              | 7.9 (7.0, 8.8)                | 3.3 (3.1, 3.4)             |
| People aged 60-79 years without any underlying conditions                | 252.6 (225.8, 279.7)           | 9.9 (6.2, 13.7)                    | 36.9 (34.3, 39.5)           | 12.1 (8.4, 15.8)            | 41.5 (38.2, 44.8)           | 96.6 (85.4, 108.0)            | 55.6 (53.3, 58.0)          |
| People aged 20-59 years with at least one underlying condition           | 679.4 (594.2, 765.4)           | 58.4 (36.4, 80.5)                  | 85.1 (79.2, 91.1)           | 66.6 (46.4, 87.0)           | 81.7 (75.2, 88.3)           | 192.4 (170.0, 215)            | 195.2 (187.1, 203.6)       |
| Pregnant women                                                           | 96.1 (79.6, 112.6)             | 20.4 (12.7, 28.2)                  | 10.7 (10.0, 11.5)           | 14.3 (10.0, 18.7)           | 7.4 (6.8, 8.0)              | 16.6 (14.7, 18.6)             | 26.5 (25.4, 27.7)          |
| <b>Reducing symptomatic infections and/or to stop virus transmission</b> |                                |                                    |                             |                             |                             |                               |                            |
| Subtotal                                                                 | 1953.6 (1715, 2194.7)          | 159.1 (99.2, 219.3)                | 268.6 (250.0, 287.7)        | 177.4 (123.4, 231.6)        | 204.5 (188.2, 220.9)        | 564.7 (499.2, 631.1)          | 579.2 (555.1, 604.1)       |
| Healthy adults (20-59 years)                                             | 1953.6 (1715, 2194.7)          | 159.1 (99.2, 219.3)                | 268.6 (250.0, 287.7)        | 177.4 (123.4, 231.6)        | 204.5 (188.2, 220.9)        | 564.7 (499.2, 631.1)          | 579.2 (555.1, 604.1)       |
| <b>Total</b>                                                             | <b>3650.5 (3207.6, 4097.9)</b> | <b>280.3 (174.7, 386.4)</b>        | <b>518.0 (482.0, 554.7)</b> | <b>322.9 (224.7, 421.6)</b> | <b>480.4 (442.0, 518.8)</b> | <b>1066.2 (942.4, 1191.4)</b> | <b>982.8 (941.9, 1025)</b> |

<sup>a</sup>: mean predictive values were used to estimate the 95% confidence interval of target population sizes.

<sup>b</sup>: School-age children, infants and toddlers were not directly prioritized as a target population, recommended by WHO.



**Table. S6. The estimates of target population sizes for COVID-19 vaccination by goals of vaccination program on a national level, assuming 0% of total people with underlying conditions in 11 countries without available data on the age-specific prevalence of underlying conditions.**

| WHO region      | Country               | Total | Maintaining essential core societal services (100,000) |                     |                         | Reducing severe COVID-19 disease (100,000)                         |                                                               |                                                           |                                                                 |                | Reducing symptomatic infections and/or to stop virus transmission (100,000) |                                                                                      |                                                              | Total no. of potential vaccine recipients, excluding SARS-CoV-2 individuals |
|-----------------|-----------------------|-------|--------------------------------------------------------|---------------------|-------------------------|--------------------------------------------------------------------|---------------------------------------------------------------|-----------------------------------------------------------|-----------------------------------------------------------------|----------------|-----------------------------------------------------------------------------|--------------------------------------------------------------------------------------|--------------------------------------------------------------|-----------------------------------------------------------------------------|
|                 |                       |       | Healthcare workers                                     | Police and military | Other essential workers | People aged $\geq 60$ years with at least one underlying condition | People aged $\geq 80$ years without any underlying conditions | People aged 60-79 years without any underlying conditions | People aged $< 60$ years with at least one underlying condition | Pregnant women | Healthy adults (20-59 years)                                                | School aged children and young people (5-19 years) without any underlying conditions | Young children (0-4 years) without any underlying conditions |                                                                             |
| Americas        |                       |       |                                                        |                     |                         |                                                                    |                                                               |                                                           |                                                                 |                |                                                                             |                                                                                      |                                                              |                                                                             |
|                 | Dominica              | 0.68  | 0.01                                                   | 0.00                | 0.04                    | -                                                                  | 0.00                                                          | 0.03                                                      | -                                                               | 0.01           | 0.31                                                                        | 0.23                                                                                 | 0.07                                                         | 0.68                                                                        |
|                 | Saint Kitts and Nevis | 0.51  | 0.00                                                   | 0.00                | 0.04                    | -                                                                  | 0.01                                                          | 0.08                                                      | -                                                               | 0.01           | 0.23                                                                        | 0.11                                                                                 | 0.03                                                         | 0.51                                                                        |
| Europe          |                       |       |                                                        |                     |                         |                                                                    |                                                               |                                                           |                                                                 |                |                                                                             |                                                                                      |                                                              |                                                                             |
|                 | Andorra               | 0.86  | 0.01                                                   | 0.00                | 0.11                    | -                                                                  | 0.04                                                          | 0.17                                                      | -                                                               | 0.01           | 0.36                                                                        | 0.13                                                                                 | 0.03                                                         | 0.84                                                                        |
|                 | Monaco                | 0.31  | 0.01                                                   | 0.00                | 0.10                    | -                                                                  | 0.04                                                          | 0.09                                                      | -                                                               | 0.00           | 0.02                                                                        | 0.04                                                                                 | 0.01                                                         | 0.31                                                                        |
|                 | San Marino            | 0.34  | 0.00                                                   | 0.00                | 0.01                    | -                                                                  | 0.02                                                          | 0.07                                                      | -                                                               | 0.00           | 0.17                                                                        | 0.05                                                                                 | 0.02                                                         | 0.33                                                                        |
| Western Pacific |                       |       |                                                        |                     |                         |                                                                    |                                                               |                                                           |                                                                 |                |                                                                             |                                                                                      |                                                              |                                                                             |
|                 | Cook Islands          | 0.09  | 0.00                                                   | 0.00                | 0.02                    | -                                                                  | 0.00                                                          | 0.01                                                      | -                                                               | 0.00           | 0.02                                                                        | 0.02                                                                                 | 0.01                                                         | 0.09                                                                        |
|                 | Marshall Islands      | 0.78  | 0.00                                                   | 0.00                | 0.04                    | -                                                                  | 0.00                                                          | 0.05                                                      | -                                                               | 0.02           | 0.32                                                                        | 0.25                                                                                 | 0.09                                                         | 0.78                                                                        |
|                 | Nauru                 | 0.10  | 0.00                                                   | 0.00                | 0.00                    | -                                                                  | 0.00                                                          | 0.01                                                      | -                                                               | 0.00           | 0.05                                                                        | 0.03                                                                                 | 0.01                                                         | 0.10                                                                        |
|                 | Niue                  | 0.01  | 0.00                                                   | 0.00                | 0.00                    | -                                                                  | 0.00                                                          | 0.00                                                      | -                                                               | 0.00           | 0.01                                                                        | 0.00                                                                                 | 0.00                                                         | 0.01                                                                        |
|                 | Palau                 | 0.22  | 0.00                                                   | 0.00                | 0.02                    | -                                                                  | 0.01                                                          | 0.03                                                      | -                                                               | 0.00           | 0.11                                                                        | 0.05                                                                                 | 0.01                                                         | 0.22                                                                        |
|                 | Tuvalu                | 0.11  | 0.00                                                   | 0.00                | 0.02                    | -                                                                  | 0.00                                                          | 0.01                                                      | -                                                               | 0.00           | 0.03                                                                        | 0.03                                                                                 | 0.01                                                         | 0.11                                                                        |

-: Data not available.

**Table. S7. National estimates of target population sizes for COVID-19 vaccination in 104 countries with data on each target population from official reports.**

| WHO region | Country (n=104)       | Total   | Maintaining essential core societal services (100,000) |                     |                         | Reducing severe COVID-19 disease (100,000)                   |                                                         |                                                           |                                                              | Reducing symptomatic infections and/or to stop virus transmission (100,000) |                              |                                                                                      | Total no. of potential vaccine recipients, excluding SARS-CoV-2 individuals (100,000s) |                                                              |
|------------|-----------------------|---------|--------------------------------------------------------|---------------------|-------------------------|--------------------------------------------------------------|---------------------------------------------------------|-----------------------------------------------------------|--------------------------------------------------------------|-----------------------------------------------------------------------------|------------------------------|--------------------------------------------------------------------------------------|----------------------------------------------------------------------------------------|--------------------------------------------------------------|
|            |                       |         | Healthcare workers                                     | Police and military | Other essential workers | People aged ≥60 years with at least one underlying condition | People aged ≥80 years without any underlying conditions | People aged 60-79 years without any underlying conditions | People aged <60 years with at least one underlying condition | Pregnant women                                                              | Healthy adults (20-59 years) | School aged children and young people (5-19 years) without any underlying conditions |                                                                                        | Young children (0-4 years) without any underlying conditions |
| Africa     | Subtotal              | 4787.77 | 6.41                                                   | 11.58               | 62.11                   | 129.9                                                        | 2.38                                                    | 75.66                                                     | 573.27                                                       | 171.92                                                                      | 1302.47                      | 1714.13                                                                              | 737.92                                                                                 | 4785.49                                                      |
|            | Benin                 | 121.23  | 0.06                                                   | 0.12                | 2.93                    | 3.99                                                         | 0.10                                                    | 2.07                                                      | 13.83                                                        | 4.39                                                                        | 32.76                        | 42.40                                                                                | 18.58                                                                                  | 121.20                                                       |
|            | Botswana              | 23.52   | 0.14                                                   | 0.19                | 0.53                    | 1.23                                                         | 0.02                                                    | 0.40                                                      | 5.18                                                         | 0.58                                                                        | 5.54                         | 7.03                                                                                 | 2.68                                                                                   | 23.44                                                        |
|            | Burkina Faso          | 209.03  | 0.20                                                   | 0.37                | 1.09                    | 5.20                                                         | 0.09                                                    | 2.92                                                      | 22.93                                                        | 7.93                                                                        | 57.78                        | 76.82                                                                                | 33.70                                                                                  | 209.01                                                       |
|            | Equatorial Guinea     | 14.03   | 0.01                                                   | 0.01                | 0.52                    | 0.37                                                         | 0.01                                                    | 0.16                                                      | 2.13                                                         | 0.47                                                                        | 4.28                         | 4.14                                                                                 | 1.94                                                                                   | 13.98                                                        |
|            | eSwatini              | 11.60   | 0.05                                                   | 0.07                | 0.17                    | 0.53                                                         | 0.01                                                    | 0.12                                                      | 2.80                                                         | 0.31                                                                        | 2.25                         | 3.89                                                                                 | 1.40                                                                                   | 11.54                                                        |
|            | Guinea-Bissau         | 19.68   | 0.02                                                   | 0.04                | 0.07                    | 0.59                                                         | 0.01                                                    | 0.30                                                      | 2.42                                                         | 0.69                                                                        | 5.64                         | 6.91                                                                                 | 2.99                                                                                   | 19.66                                                        |
|            | Kenya                 | 537.71  | 0.71                                                   | 0.69                | 8.70                    | 13.86                                                        | 0.29                                                    | 8.22                                                      | 70.71                                                        | 15.46                                                                       | 163.68                       | 186.71                                                                               | 68.68                                                                                  | 537.09                                                       |
|            | Lesotho               | 21.42   | 0.07                                                   | 0.04                | 0.23                    | 1.25                                                         | 0.02                                                    | 0.34                                                      | 5.16                                                         | 0.57                                                                        | 5.19                         | 6.08                                                                                 | 2.46                                                                                   | 21.40                                                        |
|            | Malawi                | 191.30  | 0.09                                                   | 0.15                | 0.37                    | 5.20                                                         | 0.11                                                    | 2.51                                                      | 27.59                                                        | 6.53                                                                        | 50.74                        | 69.76                                                                                | 28.24                                                                                  | 191.24                                                       |
|            | Mauritius             | 12.72   | 0.08                                                   | 0.12                | 0.45                    | 1.72                                                         | 0.04                                                    | 0.58                                                      | 2.67                                                         | 0.13                                                                        | 3.98                         | 2.32                                                                                 | 0.63                                                                                   | 12.71                                                        |
|            | Namibia               | 25.41   | 0.06                                                   | 0.16                | 1.15                    | 1.02                                                         | 0.02                                                    | 0.38                                                      | 4.46                                                         | 0.73                                                                        | 6.18                         | 7.96                                                                                 | 3.29                                                                                   | 25.28                                                        |
|            | Nigeria               | 2061.40 | 3.22                                                   | 5.87                | 34.15                   | 57.17                                                        | 0.82                                                    | 35.02                                                     | 232.99                                                       | 78.14                                                                       | 547.24                       | 737.18                                                                               | 329.61                                                                                 | 2060.75                                                      |
|            | Rwanda                | 129.52  | 0.17                                                   | 1.45                | 2.24                    | 3.96                                                         | 0.09                                                    | 2.58                                                      | 14.69                                                        | 4.11                                                                        | 38.28                        | 43.54                                                                                | 18.42                                                                                  | 129.47                                                       |
|            | São Tomé and Príncipe | 2.19    | 0.00                                                   | 0.01                | 0.03                    | 0.07                                                         | 0.00                                                    | 0.04                                                      | 0.26                                                         | 0.07                                                                        | 0.59                         | 0.80                                                                                 | 0.31                                                                                   | 2.18                                                         |
|            | Senegal               | 167.44  | 0.06                                                   | 0.19                | 2.67                    | 5.25                                                         | 0.11                                                    | 2.70                                                      | 18.13                                                        | 5.78                                                                        | 46.84                        | 60.04                                                                                | 25.65                                                                                  | 167.28                                                       |
|            | Seychelles            | 0.98    | 0.01                                                   | 0.01                | 0.12                    | 0.08                                                         | 0.00                                                    | 0.04                                                      | 0.17                                                         | 0.02                                                                        | 0.25                         | 0.21                                                                                 | 0.08                                                                                   | 0.98                                                         |
|            | Tanzania              | 597.34  | 0.36                                                   | 1.10                | 2.96                    | 15.16                                                        | 0.36                                                    | 9.76                                                      | 67.08                                                        | 21.92                                                                       | 168.42                       | 215.34                                                                               | 94.89                                                                                  | 597.34                                                       |
|            | Uganda                | 457.41  | 0.64                                                   | 0.83                | 2.27                    | 9.16                                                         | 0.19                                                    | 5.41                                                      | 53.97                                                        | 17.44                                                                       | 117.17                       | 174.54                                                                               | 75.78                                                                                  | 457.27                                                       |
|            | Zambia                | 183.84  | 0.46                                                   | 0.16                | 1.46                    | 4.09                                                         | 0.09                                                    | 2.11                                                      | 26.10                                                        | 6.65                                                                        | 45.66                        | 68.46                                                                                | 28.59                                                                                  | 183.67                                                       |

|                       |                                  |         |        |       |        |         |       |        |        |        |         |         |        |         |
|-----------------------|----------------------------------|---------|--------|-------|--------|---------|-------|--------|--------|--------|---------|---------|--------|---------|
| Americas              | Subtotal                         | 8908.41 | 104.14 | 68.71 | 201.92 | 1031.33 | 41.18 | 465.2  | 1119.6 | 124.15 | 3312.98 | 1836.92 | 602.28 | 8312.51 |
|                       | Antigua and Barbuda              | 0.98    | 0.01   | 0.01  | 0.11   | 0.09    | 0.00  | 0.05   | 0.15   | 0.02   | 0.27    | 0.20    | 0.07   | 0.98    |
|                       | Bolivia                          | 116.73  | 0.37   | 1.02  | 4.78   | 7.51    | 0.42  | 4.17   | 12.48  | 2.54   | 38.71   | 33.20   | 11.54  | 115.31  |
|                       | Brazil                           | 2125.59 | 26.11  | 10.49 | 60.57  | 177.83  | 8.88  | 111.87 | 250.71 | 29.60  | 866.94  | 440.94  | 141.67 | 1920.27 |
|                       | Canada                           | 377.42  | 4.63   | 1.41  | 21.91  | 60.22   | 3.10  | 30.64  | 40.98  | 3.81   | 133.60  | 57.62   | 19.52  | 374.82  |
|                       | Chile                            | 191.16  | 3.04   | 1.87  | 7.27   | 21.34   | 0.99  | 10.90  | 22.77  | 2.38   | 72.63   | 36.54   | 11.44  | 185.95  |
|                       | Colombia                         | 508.83  | 1.79   | 6.41  | 10.55  | 41.41   | 1.79  | 23.76  | 58.42  | 7.57   | 206.24  | 114.39  | 36.49  | 497.46  |
|                       | Costa Rica                       | 50.94   | 0.32   | 0.05  | 1.81   | 4.95    | 0.20  | 2.52   | 6.84   | 0.71   | 19.80   | 10.33   | 3.41   | 49.78   |
|                       | Cuba                             | 113.27  | 1.81   | 1.19  | 6.18   | 14.97   | 0.91  | 8.20   | 15.97  | 1.15   | 39.43   | 17.91   | 5.55   | 113.19  |
|                       | Dominican Republic               | 108.48  | 0.32   | 1.03  | 3.55   | 7.38    | 0.37  | 4.30   | 13.18  | 2.12   | 38.37   | 28.07   | 9.80   | 101.21  |
|                       | Ecuador                          | 176.43  | 0.80   | 0.83  | 5.60   | 11.65   | 0.59  | 7.17   | 19.39  | 3.48   | 65.35   | 45.29   | 16.28  | 97.58   |
|                       | El Salvador                      | 64.86   | 0.22   | 0.76  | 1.70   | 5.28    | 0.23  | 2.31   | 8.69   | 1.18   | 22.27   | 16.56   | 5.64   | 64.51   |
|                       | Grenada                          | 1.13    | 0.01   | 0.01  | 0.13   | 0.11    | 0.00  | 0.05   | 0.17   | 0.02   | 0.29    | 0.24    | 0.09   | 1.12    |
|                       | Guyana                           | 7.87    | 0.01   | 0.06  | 0.22   | 0.57    | 0.02  | 0.27   | 1.19   | 0.16   | 2.57    | 2.08    | 0.72   | 7.82    |
|                       | Jamaica                          | 29.61   | 0.06   | 0.15  | 1.65   | 2.66    | 0.11  | 1.16   | 4.45   | 0.48   | 9.99    | 6.66    | 2.24   | 29.52   |
|                       | Mexico                           | 1289.33 | 6.16   | 7.66  | 46.20  | 104.92  | 3.03  | 36.97  | 210.48 | 22.69  | 420.10  | 323.13  | 107.98 | 1279.71 |
|                       | Nicaragua                        | 66.25   | 0.17   | 0.24  | 1.14   | 3.77    | 0.13  | 1.85   | 8.52   | 1.37   | 24.36   | 18.25   | 6.45   | 66.20   |
|                       | Peru                             | 329.72  | 1.23   | 2.62  | 13.24  | 23.26   | 1.41  | 16.58  | 35.84  | 5.92   | 127.88  | 74.12   | 27.63  | 320.52  |
|                       | Saint Vincent and the Grenadines | 1.11    | 0.01   | 0.01  | 0.07   | 0.11    | 0.00  | 0.05   | 0.18   | 0.02   | 0.34    | 0.24    | 0.07   | 1.11    |
|                       | The Bahamas                      | 3.93    | 0.03   | 0.05  | 0.37   | 0.30    | 0.01  | 0.17   | 0.62   | 0.05   | 1.22    | 0.86    | 0.26   | 3.86    |
|                       | United States                    | 3310.03 | 56.80  | 32.35 | 13.11  | 538.21  | 18.73 | 200.24 | 404.50 | 38.40  | 1211.22 | 603.36  | 193.10 | 3046.89 |
|                       | Uruguay                          | 34.74   | 0.24   | 0.49  | 1.76   | 4.79    | 0.26  | 1.97   | 4.07   | 0.48   | 11.40   | 6.93    | 2.33   | 34.70   |
| Eastern Mediterranean | Subtotal                         | 4132.3  | 10.86  | 33.27 | 105.15 | 212.24  | 5.04  | 94.21  | 577.33 | 105.58 | 1346.47 | 1171.62 | 470.56 | 3916.22 |
|                       | Bahrain                          | 17.02   | 0.06   | 0.19  | 0.54   | 0.65    | 0.01  | 0.25   | 2.98   | 0.24   | 8.28    | 2.78    | 1.05   | 16.18   |
|                       | Egypt                            | 1023.34 | 2.43   | 13.36 | 34.95  | 60.28   | 1.14  | 22.75  | 160.09 | 26.99  | 292.62  | 287.37  | 121.36 | 1022.25 |
|                       | Lebanon                          | 68.25   | 0.26   | 0.80  | 1.60   | 5.52    | 0.16  | 1.97   | 11.09  | 1.20   | 23.98   | 16.23   | 5.46   | 67.31   |
|                       | Libya                            | 68.71   | 0.59   | 0.17  | 1.09   | 3.46    | 0.08  | 1.21   | 11.97  | 1.29   | 25.42   | 17.42   | 6.01   | 65.15   |
|                       | Morocco                          | 369.11  | 0.78   | 3.11  | 6.32   | 30.45   | 0.70  | 12.60  | 57.36  | 6.99   | 128.78  | 89.89   | 32.12  | 366.54  |

|        |                        |         |       |       |        |         |       |        |        |       |         |        |        |         |
|--------|------------------------|---------|-------|-------|--------|---------|-------|--------|--------|-------|---------|--------|--------|---------|
|        | Pakistan               | 2208.92 | 3.64  | 12.90 | 51.67  | 97.10   | 2.67  | 49.08  | 271.55 | 62.40 | 704.77  | 679.07 | 274.07 | 2006.69 |
|        | Qatar                  | 28.81   | 0.28  | 0.22  | 0.68   | 0.73    | 0.01  | 0.30   | 5.16   | 0.27  | 16.36   | 3.49   | 1.32   | 27.47   |
|        | Saudi Arabia           | 348.14  | 2.82  | 2.52  | 8.30   | 14.05   | 0.27  | 6.05   | 57.13  | 6.20  | 146.26  | 75.37  | 29.17  | 344.63  |
| Europe | Subtotal               | 6198.15 | 76.38 | 48.94 | 274.98 | 1070.01 | 59.55 | 465.71 | 797.34 | 63.93 | 2047.18 | 974.05 | 320.11 | 5802.82 |
|        | Armenia                | 29.63   | 0.31  | 0.49  | 0.86   | 3.84    | 0.14  | 1.49   | 4.71   | 0.41  | 9.73    | 5.63   | 2.02   | 28.56   |
|        | Austria                | 90.06   | 0.49  | 0.50  | 4.84   | 15.82   | 0.79  | 6.51   | 11.76  | 0.87  | 31.45   | 12.62  | 4.42   | 88.54   |
|        | Belarus                | 94.49   | 1.53  | 1.86  | 5.31   | 14.47   | 0.62  | 6.28   | 14.65  | 0.94  | 28.69   | 14.76  | 5.38   | 93.43   |
|        | Belgium                | 115.90  | 2.61  | 0.70  | 4.65   | 20.15   | 1.09  | 8.43   | 14.43  | 1.19  | 37.16   | 19.24  | 6.25   | 110.89  |
|        | Bosnia and Herzegovina | 32.81   | 0.26  | 0.28  | 1.10   | 6.06    | 0.19  | 2.05   | 5.10   | 0.27  | 11.28   | 4.92   | 1.31   | 32.18   |
|        | Bulgaria               | 69.48   | 0.61  | 0.55  | 3.90   | 14.05   | 0.52  | 5.02   | 10.01  | 0.62  | 21.27   | 9.85   | 3.07   | 68.73   |
|        | Croatia                | 41.05   | 0.46  | 0.39  | 2.21   | 8.25    | 0.37  | 3.00   | 5.60   | 0.37  | 12.68   | 5.92   | 1.81   | 40.38   |
|        | Cyprus                 | 12.07   | 0.09  | 0.23  | 0.71   | 1.56    | 0.07  | 0.76   | 1.41   | 0.13  | 4.45    | 2.03   | 0.64   | 12.01   |
|        | Czech Republic         | 107.09  | 1.34  | 0.63  | 5.87   | 20.63   | 0.66  | 6.72   | 15.94  | 1.15  | 32.94   | 15.71  | 5.50   | 102.94  |
|        | Denmark                | 57.92   | 0.83  | 0.26  | 2.51   | 10.69   | 0.43  | 4.02   | 7.72   | 0.61  | 18.37   | 9.43   | 3.05   | 57.02   |
|        | Estonia                | 13.27   | 0.21  | 0.10  | 0.78   | 2.57    | 0.12  | 0.87   | 2.03   | 0.14  | 3.71    | 2.05   | 0.68   | 13.20   |
|        | Finland                | 55.41   | 1.03  | 0.32  | 2.36   | 10.69   | 0.55  | 4.82   | 6.71   | 0.48  | 17.05   | 8.80   | 2.60   | 55.23   |
|        | France                 | 652.74  | 9.62  | 4.79  | 25.86  | 111.96  | 7.62  | 55.62  | 67.97  | 7.38  | 211.72  | 114.56 | 35.64  | 616.28  |
|        | Georgia                | 39.89   | 0.47  | 0.68  | 1.13   | 6.14    | 0.23  | 2.20   | 6.52   | 0.54  | 12.06   | 7.27   | 2.64   | 39.28   |
|        | Germany                | 837.84  | 14.65 | 4.96  | 39.92  | 162.77  | 9.90  | 67.24  | 102.89 | 7.96  | 273.14  | 114.35 | 40.06  | 800.12  |
|        | Greece                 | 104.23  | 0.95  | 2.01  | 4.78   | 19.49   | 1.48  | 9.02   | 12.13  | 0.84  | 34.54   | 14.95  | 4.04   | 103.66  |
|        | Iceland                | 3.41    | 0.07  | 0.01  | 0.23   | 0.48    | 0.02  | 0.23   | 0.42   | 0.04  | 1.05    | 0.65   | 0.20   | 3.35    |
|        | Ireland                | 49.38   | 0.96  | 0.24  | 2.74   | 6.54    | 0.26  | 2.90   | 6.62   | 0.62  | 15.52   | 9.92   | 3.08   | 47.79   |
|        | Israel                 | 86.56   | 0.43  | 2.06  | 3.32   | 9.23    | 0.46  | 4.55   | 8.49   | 1.80  | 26.18   | 21.67  | 8.36   | 83.37   |
|        | Italy                  | 604.62  | 5.88  | 6.47  | 24.27  | 116.28  | 8.72  | 55.42  | 69.40  | 4.41  | 209.14  | 81.71  | 22.92  | 435.65  |
|        | Kyrgyzstan             | 65.24   | 0.53  | 0.11  | 3.69   | 3.26    | 0.10  | 1.92   | 8.32   | 1.77  | 20.07   | 18.00  | 7.46   | 64.61   |
|        | Latvia                 | 18.86   | 0.15  | 0.15  | 1.16   | 3.73    | 0.16  | 1.31   | 2.87   | 0.19  | 5.28    | 2.74   | 1.12   | 18.78   |
|        | Lithuania              | 27.22   | 0.44  | 0.42  | 1.62   | 5.35    | 0.27  | 1.86   | 4.23   | 0.27  | 7.46    | 3.86   | 1.43   | 26.98   |
|        | Moldova                | 40.34   | 0.33  | 0.09  | 0.69   | 5.05    | 0.16  | 2.41   | 6.87   | 0.41  | 16.14   | 6.20   | 1.99   | 39.52   |
|        | Netherlands            | 171.35  | 2.53  | 0.91  | 7.51   | 30.88   | 1.40  | 13.29  | 22.13  | 1.66  | 54.98   | 27.58  | 8.47   | 167.25  |

|                 |                |          |        |        |        |         |        |         |         |        |         |         |         |          |
|-----------------|----------------|----------|--------|--------|--------|---------|--------|---------|---------|--------|---------|---------|---------|----------|
|                 | Macedonia      | 20.83    | 0.14   | 0.28   | 0.89   | 3.01    | 0.09   | 1.22    | 3.10    | 0.23   | 7.41    | 3.38    | 1.10    | 20.44    |
|                 | Norway         | 54.21    | 1.15   | 0.41   | 2.34   | 8.33    | 0.40   | 3.89    | 6.69    | 0.56   | 18.29   | 9.20    | 2.96    | 53.98    |
|                 | Poland         | 378.47   | 3.51   | 2.91   | 15.78  | 68.29   | 2.90   | 26.98   | 52.25   | 3.86   | 129.12  | 54.35   | 18.52   | 373.00   |
|                 | Portugal       | 101.97   | 1.23   | 1.02   | 5.06   | 20.38   | 1.18   | 8.38    | 14.26   | 0.87   | 31.61   | 14.03   | 3.94    | 100.17   |
|                 | Romania        | 192.38   | 1.99   | 1.73   | 9.09   | 34.09   | 1.58   | 14.23   | 26.12   | 1.85   | 62.92   | 29.53   | 9.25    | 189.34   |
|                 | Serbia         | 87.37    | 0.80   | 0.60   | 2.64   | 15.98   | 0.51   | 5.64    | 12.07   | 0.80   | 30.19   | 14.00   | 4.14    | 86.75    |
|                 | Slovakia       | 54.60    | 0.20   | 0.38   | 3.03   | 8.85    | 0.29   | 3.60    | 8.02    | 0.58   | 18.84   | 8.02    | 2.79    | 53.84    |
|                 | Slovenia       | 20.79    | 0.27   | 0.15   | 1.04   | 3.99    | 0.19   | 1.59    | 2.80    | 0.20   | 6.59    | 2.97    | 1.00    | 20.34    |
|                 | Spain          | 467.55   | 4.49   | 3.64   | 24.97  | 78.57   | 5.53   | 38.70   | 58.60   | 3.69   | 162.93  | 67.08   | 19.36   | 432.75   |
|                 | Sweden         | 100.99   | 1.60   | 0.51   | 4.23   | 18.30   | 0.87   | 7.03    | 13.20   | 1.15   | 31.70   | 16.51   | 5.90    | 83.27    |
|                 | Switzerland    | 86.55    | 1.89   | 0.40   | 3.91   | 14.28   | 0.81   | 6.80    | 10.61   | 0.87   | 30.22   | 12.31   | 4.46    | 77.60    |
|                 | Tajikistan     | 95.38    | 0.65   | 0.17   | 1.54   | 3.52    | 0.08   | 1.90    | 12.12   | 2.93   | 30.22   | 28.94   | 13.31   | 95.26    |
|                 | Ukraine        | 437.34   | 4.22   | 4.56   | 16.21  | 71.13   | 3.06   | 29.21   | 72.20   | 3.80   | 145.97  | 66.25   | 20.73   | 432.65   |
|                 | United Kingdom | 678.86   | 7.46   | 2.97   | 32.23  | 111.35  | 5.73   | 48.60   | 86.37   | 7.47   | 225.11  | 113.06  | 38.51   | 633.68   |
| South-East Asia | Subtotal       | 14776.73 | 40.3   | 75.11  | 43.84  | 968.81  | 34.18  | 567.64  | 2263.88 | 257.75 | 5771.56 | 3600.63 | 1153.08 | 13007.54 |
|                 | Bhutan         | 7.72     | 0.02   | 0.06   | 0.12   | 0.42    | 0.02   | 0.25    | 0.89    | 0.13   | 3.27    | 1.91    | 0.63    | 7.71     |
|                 | India          | 13800.04 | 35.66  | 49.57  | 2.27   | 861.52  | 28.85  | 505.74  | 2108.30 | 246.43 | 5436.48 | 3426.54 | 1098.70 | 12030.90 |
|                 | North Korea    | 257.79   | 2.10   | 18.80  | 1.58   | 24.93   | 0.92   | 12.98   | 42.53   | 3.58   | 83.33   | 50.04   | 17.01   | 257.79   |
|                 | Thailand       | 698.00   | 2.49   | 6.66   | 39.78  | 81.38   | 4.37   | 48.38   | 110.51  | 7.22   | 244.44  | 117.77  | 35.01   | 697.96   |
|                 | Timor-Leste    | 13.18    | 0.03   | 0.02   | 0.09   | 0.56    | 0.02   | 0.29    | 1.65    | 0.39   | 4.04    | 4.37    | 1.73    | 13.18    |
| Western Pacific | Subtotal       | 18839.45 | 103.64 | 104.13 | 366.72 | 1944.94 | 106.36 | 1302.55 | 2716.52 | 218.58 | 7543.54 | 3322.59 | 1109.91 | 18485.64 |
|                 | Australia      | 255.00   | 4.14   | 1.13   | 16.87  | 35.02   | 1.99   | 18.52   | 26.28   | 3.21   | 85.39   | 46.10   | 16.34   | 254.72   |
|                 | Brunei         | 4.37     | 0.03   | 0.12   | 0.25   | 0.28    | 0.01   | 0.13    | 0.73    | 0.07   | 1.48    | 0.96    | 0.31    | 4.37     |
|                 | Cambodia       | 167.19   | 0.15   | 2.55   | 2.31   | 7.81    | 0.20   | 4.64    | 22.98   | 3.76   | 59.24   | 46.26   | 17.30   | 167.19   |
|                 | China          | 14393.24 | 66.81  | 46.95  | 145.80 | 1402.43 | 70.37  | 1024.96 | 2114.19 | 156.89 | 6104.69 | 2445.00 | 815.15  | 14046.88 |
|                 | Fiji           | 8.96     | 0.04   | 0.08   | 0.35   | 0.69    | 0.01   | 0.16    | 2.08    | 0.19   | 2.17    | 2.32    | 0.87    | 8.96     |
|                 | Japan          | 1264.76  | 18.42  | 5.49   | 79.00  | 275.31  | 24.05  | 134.76  | 146.92  | 9.36   | 364.56  | 160.35  | 46.55   | 1262.42  |
|                 | Laos           | 72.76    | 0.10   | 0.03   | 0.62   | 3.22    | 0.08   | 1.65    | 10.41   | 1.71   | 25.86   | 21.32   | 7.76    | 72.76    |

|             |         |      |       |       |       |      |       |        |       |        |        |        |         |
|-------------|---------|------|-------|-------|-------|------|-------|--------|-------|--------|--------|--------|---------|
| Mongolia    | 32.78   | 0.22 | 0.18  | 1.27  | 1.52  | 0.04 | 0.83  | 4.47   | 0.79  | 11.42  | 8.34   | 3.70   | 32.78   |
| Philippines | 1095.81 | 6.07 | 3.23  | 39.17 | 62.84 | 1.67 | 29.82 | 162.55 | 22.51 | 352.25 | 312.41 | 103.30 | 1091.85 |
| Singapore   | 58.50   | 0.50 | 0.91  | 8.25  | 7.14  | 0.29 | 4.82  | 8.70   | 0.51  | 17.83  | 7.03   | 2.54   | 57.92   |
| South Korea | 512.69  | 4.95 | 37.98 | 24.41 | 72.75 | 3.95 | 42.01 | 72.31  | 3.28  | 164.59 | 67.85  | 18.61  | 512.42  |
| Vietnam     | 973.39  | 2.21 | 5.48  | 48.42 | 75.93 | 3.70 | 40.25 | 144.90 | 16.30 | 354.06 | 204.65 | 77.48  | 973.37  |

---

**Table. S8. National estimates of target population sizes for COVID-19 vaccination among those who are willing to accept COVID-19 vaccination.**

| WHO region | Country (n=104)       | Total                  | Maintaining essential core societal services (100,000; mean,95%CI) |                     |                         | Reducing severe COVID-19 disease (100,000; mean,95%CI)      |                                                         |                                                        |                                                                  |                   | Reducing symptomatic infections and/or to stop virus transmission (100,000; mean, 95%CI) |                                                                                      |                                                              |
|------------|-----------------------|------------------------|--------------------------------------------------------------------|---------------------|-------------------------|-------------------------------------------------------------|---------------------------------------------------------|--------------------------------------------------------|------------------------------------------------------------------|-------------------|------------------------------------------------------------------------------------------|--------------------------------------------------------------------------------------|--------------------------------------------------------------|
|            |                       |                        | Healthcare workers                                                 | Police and military | Other essential workers | People aged 60 years with at least one underlying condition | People aged ≥80 years without any underlying conditions | People aged 79 years without any underlying conditions | 60- People aged <60 years with at least one underlying condition | Pregnant women    | Healthy adults (20-59 years)                                                             | School aged children and young people (5-19 years) without any underlying conditions | Young children (0-4 years) without any underlying conditions |
| Africa     |                       |                        |                                                                    |                     |                         |                                                             |                                                         |                                                        |                                                                  |                   |                                                                                          |                                                                                      |                                                              |
|            | Benin                 | 63.4 (39.5, 87.4)      | 0 (0, 0)                                                           | 0.1 (0, 0.1)        | 1.5 (1, 2.1)            | 2.1 (1.3, 2.9)                                              | 0.1 (0, 0.1)                                            | 1.1 (0.7, 1.5)                                         | 7.2 (4.5, 10)                                                    | 2.3 (1.4, 3.2)    | 17.1 (10.7, 23.6)                                                                        | 22.2 (13.8, 30.6)                                                                    | 9.7 (6.1, 13.4)                                              |
|            | Botswana              | 12.3 (7.7, 17)         | 0.1 (0, 0.1)                                                       | 0.1 (0.1, 0.1)      | 0.3 (0.2, 0.4)          | 0.6 (0.4, 0.9)                                              | 0 (0, 0)                                                | 0.2 (0.1, 0.3)                                         | 2.7 (1.7, 3.7)                                                   | 0.3 (0.2, 0.4)    | 2.9 (1.8, 4)                                                                             | 3.7 (2.3, 5.1)                                                                       | 1.4 (0.9, 1.9)                                               |
|            | Burkina Faso          | 109.3 (68.1, 150.7)    | 0.1 (0.1, 0.1)                                                     | 0.2 (0.1, 0.3)      | 0.6 (0.4, 0.8)          | 2.7 (1.7, 3.7)                                              | 0 (0, 0.1)                                              | 1.5 (1, 2.1)                                           | 12 (7.5, 16.5)                                                   | 4.1 (2.6, 5.7)    | 30.2 (18.8, 41.7)                                                                        | 40.2 (25, 55.4)                                                                      | 17.6 (11, 24.3)                                              |
|            | Equatorial Guinea     | 7.3 (4.6, 10.1)        | 0 (0, 0)                                                           | 0 (0, 0)            | 0.3 (0.2, 0.4)          | 0.2 (0.1, 0.3)                                              | 0 (0, 0)                                                | 0.1 (0.1, 0.1)                                         | 1.1 (0.7, 1.5)                                                   | 0.2 (0.2, 0.3)    | 2.2 (1.4, 3.1)                                                                           | 2.2 (1.3, 3)                                                                         | 1 (0.6, 1.4)                                                 |
|            | Guinea-Bissau         | 10.3 (6.4, 14.2)       | 0 (0, 0)                                                           | 0 (0, 0)            | 0 (0, 0)                | 0.3 (0.2, 0.4)                                              | 0 (0, 0)                                                | 0.2 (0.1, 0.2)                                         | 1.3 (0.8, 1.7)                                                   | 0.4 (0.2, 0.5)    | 3 (1.8, 4.1)                                                                             | 3.6 (2.3, 5)                                                                         | 1.6 (1, 2.2)                                                 |
|            | Kenya                 | 281.2 (175.3, 387.7)   | 0.4 (0.2, 0.5)                                                     | 0.4 (0.2, 0.5)      | 4.6 (2.8, 6.3)          | 7.2 (4.5, 10)                                               | 0.2 (0.1, 0.2)                                          | 4.3 (2.7, 5.9)                                         | 37 (23.1, 51)                                                    | 8.1 (5, 11.1)     | 85.6 (53.4, 118)                                                                         | 97.6 (60.9, 134.6)                                                                   | 35.9 (22.4, 49.5)                                            |
|            | Lesotho               | 11.2 (7, 15.4)         | 0 (0, 0.1)                                                         | 0 (0, 0)            | 0.1 (0.1, 0.2)          | 0.7 (0.4, 0.9)                                              | 0 (0, 0)                                                | 0.2 (0.1, 0.2)                                         | 2.7 (1.7, 3.7)                                                   | 0.3 (0.2, 0.4)    | 2.7 (1.7, 3.7)                                                                           | 3.2 (2, 4.4)                                                                         | 1.3 (0.8, 1.8)                                               |
|            | Malawi                | 100 (62.4, 137.9)      | 0 (0, 0.1)                                                         | 0.1 (0, 0.1)        | 0.2 (0.1, 0.3)          | 2.7 (1.7, 3.8)                                              | 0.1 (0, 0.1)                                            | 1.3 (0.8, 1.8)                                         | 14.4 (9, 19.9)                                                   | 3.4 (2.1, 4.7)    | 26.5 (16.5, 36.6)                                                                        | 36.5 (22.7, 50.3)                                                                    | 14.8 (9.2, 20.4)                                             |
|            | Mauritius             | 6.7 (4.1, 9.2)         | 0 (0, 0.1)                                                         | 0.1 (0, 0.1)        | 0.2 (0.1, 0.3)          | 0.9 (0.6, 1.2)                                              | 0 (0, 0)                                                | 0.3 (0.2, 0.4)                                         | 1.4 (0.9, 1.9)                                                   | 0.1 (0, 0.1)      | 2.1 (1.3, 2.9)                                                                           | 1.2 (0.8, 1.7)                                                                       | 0.3 (0.2, 0.5)                                               |
|            | Namibia               | 13.3 (8.3, 18.3)       | 0 (0, 0)                                                           | 0.1 (0.1, 0.1)      | 0.6 (0.4, 0.8)          | 0.5 (0.3, 0.7)                                              | 0 (0, 0)                                                | 0.2 (0.1, 0.3)                                         | 2.3 (1.5, 3.2)                                                   | 0.4 (0.2, 0.5)    | 3.2 (2, 4.5)                                                                             | 4.2 (2.6, 5.7)                                                                       | 1.7 (1.1, 2.4)                                               |
|            | Nigeria               | 1158.5 (601.9, 1717.1) | 1.8 (0.9, 2.7)                                                     | 3.3 (1.7, 4.9)      | 19.2 (10, 28.5)         | 32.1 (16.7, 47.6)                                           | 0.5 (0.2, 0.7)                                          | 19.7 (10.2, 29.2)                                      | 130.9 (68, 194.1)                                                | 43.9 (22.8, 65.1) | 307.5 (159.8, 455.8)                                                                     | 414.3 (215.3, 614.1)                                                                 | 185.2 (96.2, 274.6)                                          |
|            | Rwanda                | 67.7 (42.2, 93.4)      | 0.1 (0.1, 0.1)                                                     | 0.8 (0.5, 1)        | 1.2 (0.7, 1.6)          | 2.1 (1.3, 2.9)                                              | 0 (0, 0.1)                                              | 1.3 (0.8, 1.9)                                         | 7.7 (4.8, 10.6)                                                  | 2.1 (1.3, 3)      | 20 (12.5, 27.6)                                                                          | 22.8 (14.2, 31.4)                                                                    | 9.6 (6, 13.3)                                                |
|            | Sao Tome and Principe | 1.1 (0.7, 1.6)         | 0 (0, 0)                                                           | 0 (0, 0)            | 0 (0, 0)                | 0 (0, 0.1)                                                  | 0 (0, 0)                                                | 0 (0, 0)                                               | 0.1 (0.1, 0.2)                                                   | 0 (0, 0)          | 0.3 (0.2, 0.4)                                                                           | 0.4 (0.3, 0.6)                                                                       | 0.2 (0.1, 0.2)                                               |
|            | Senegal               | 87.6 (54.6, 120.7)     | 0 (0, 0)                                                           | 0.1 (0.1, 0.1)      | 1.4 (0.9, 1.9)          | 2.7 (1.7, 3.8)                                              | 0.1 (0, 0.1)                                            | 1.4 (0.9, 1.9)                                         | 9.5 (5.9, 13.1)                                                  | 3 (1.9, 4.2)      | 24.5 (15.3, 33.8)                                                                        | 31.4 (19.6, 43.3)                                                                    | 13.4 (8.4, 18.5)                                             |
|            | Seychelles            | 0.5 (0.3, 0.7)         | 0 (0, 0)                                                           | 0 (0, 0)            | 0.1 (0, 0.1)            | 0 (0, 0.1)                                                  | 0 (0, 0)                                                | 0 (0, 0)                                               | 0.1 (0.1, 0.1)                                                   | 0 (0, 0)          | 0.1 (0.1, 0.2)                                                                           | 0.1 (0.1, 0.2)                                                                       | 0 (0, 0.1)                                                   |
|            | Swaziland             | 6.1 (3.8, 8.4)         | 0 (0, 0)                                                           | 0 (0, 0.1)          | 0.1 (0.1, 0.1)          | 0.3 (0.2, 0.4)                                              | 0 (0, 0)                                                | 0.1 (0, 0.1)                                           | 1.5 (0.9, 2)                                                     | 0.2 (0.1, 0.2)    | 1.2 (0.7, 1.6)                                                                           | 2 (1.3, 2.8)                                                                         | 0.7 (0.5, 1)                                                 |
|            | Tanzania              | 312.4 (194.7, 430.7)   | 0.2 (0.1, 0.3)                                                     | 0.6 (0.4, 0.8)      | 1.5 (1, 2.1)            | 7.9 (4.9, 10.9)                                             | 0.2 (0.1, 0.3)                                          | 5.1 (3.2, 7)                                           | 35.1 (21.9, 48.4)                                                | 11.5 (7.1, 15.8)  | 88.1 (54.9, 121.4)                                                                       | 112.6 (70.2, 155.3)                                                                  | 49.6 (30.9, 68.4)                                            |
|            | Uganda                | 239.2 (149.1, 329.8)   | 0.3 (0.2, 0.5)                                                     | 0.4 (0.3, 0.6)      | 1.2 (0.7, 1.6)          | 4.8 (3, 6.6)                                                | 0.1 (0.1, 0.1)                                          | 2.8 (1.8, 3.9)                                         | 28.2 (17.6, 38.9)                                                | 9.1 (5.7, 12.6)   | 61.3 (38.2, 84.5)                                                                        | 91.3 (56.9, 125.8)                                                                   | 39.6 (24.7, 54.6)                                            |
|            | Zambia                | 96.1 (59.9, 132.5)     | 0.2 (0.2, 0.3)                                                     | 0.1 (0.1, 0.1)      | 0.8 (0.5, 1.1)          | 2.1 (1.3, 3)                                                | 0 (0, 0.1)                                              | 1.1 (0.7, 1.5)                                         | 13.6 (8.5, 18.8)                                                 | 3.5 (2.2, 4.8)    | 23.9 (14.9, 32.9)                                                                        | 35.8 (22.3, 49.4)                                                                    | 15 (9.3, 20.6)                                               |
| Americas   |                       |                        |                                                                    |                     |                         |                                                             |                                                         |                                                        |                                                                  |                   |                                                                                          |                                                                                      |                                                              |
|            | Antigua and Barbuda   | 0.7 (0.7, 0.8)         | 0 (0, 0)                                                           | 0 (0, 0)            | 0.1 (0.1, 0.1)          | 0.1 (0.1, 0.1)                                              | 0 (0, 0)                                                | 0 (0, 0)                                               | 0.1 (0.1, 0.1)                                                   | 0 (0, 0)          | 0.2 (0.2, 0.2)                                                                           | 0.1 (0.1, 0.2)                                                                       | 0.1 (0, 0.1)                                                 |

|                                  |                         |                 |                   |                   |                      |                   |                      |                      |                   |                      |                      |                      |
|----------------------------------|-------------------------|-----------------|-------------------|-------------------|----------------------|-------------------|----------------------|----------------------|-------------------|----------------------|----------------------|----------------------|
| Bolivia                          | 84 (78.2, 90)           | 0.3 (0.2, 0.3)  | 0.7 (0.7, 0.8)    | 3.4 (3.2, 3.7)    | 5.4 (5, 5.8)         | 0.3 (0.3, 0.3)    | 3 (2.8, 3.2)         | 9 (8.4, 9.6)         | 1.8 (1.7, 2)      | 27.9 (25.9, 29.8)    | 23.9 (22.2, 25.6)    | 8.3 (7.7, 8.9)       |
| Brazil                           | 1815.3 (1760, 1868.4)   | 22.3 (21.6, 23) | 9 (8.7, 9.2)      | 51.7 (50.2, 53.2) | 151.9 (147.2, 156.3) | 7.6 (7.4, 7.8)    | 95.5 (92.6, 98.3)    | 214.1 (207.6, 220.4) | 25.3 (24.5, 26)   | 740.4 (717.8, 762)   | 376.6 (365.1, 387.6) | 121 (117.3, 124.5)   |
| Canada                           | 281.6 (238.9, 324.6)    | 3.5 (2.9, 4)    | 1.1 (0.9, 1.2)    | 16.3 (13.9, 18.8) | 44.9 (38.1, 51.8)    | 2.3 (2, 2.7)      | 22.9 (19.4, 26.4)    | 30.6 (25.9, 35.2)    | 2.8 (2.4, 3.3)    | 99.7 (84.6, 114.9)   | 43 (36.5, 49.6)      | 14.6 (12.4, 16.8)    |
| Chile                            | 137.6 (128.1, 147.4)    | 2.2 (2, 2.3)    | 1.3 (1.3, 1.4)    | 5.2 (4.9, 5.6)    | 15.4 (14.3, 16.5)    | 0.7 (0.7, 0.8)    | 7.8 (7.3, 8.4)       | 16.4 (15.3, 17.6)    | 1.7 (1.6, 1.8)    | 52.3 (48.7, 56)      | 26.3 (24.5, 28.2)    | 8.2 (7.7, 8.8)       |
| Colombia                         | 366.4 (340.9, 392.3)    | 1.3 (1.2, 1.4)  | 4.6 (4.3, 4.9)    | 7.6 (7.1, 8.1)    | 29.8 (27.7, 31.9)    | 1.3 (1.2, 1.4)    | 17.1 (15.9, 18.3)    | 42.1 (39.1, 45)      | 5.5 (5.1, 5.8)    | 148.5 (138.2, 159)   | 82.4 (76.6, 88.2)    | 26.3 (24.4, 28.1)    |
| Costa Rica                       | 36.7 (34.1, 39.3)       | 0.2 (0.2, 0.2)  | 0 (0, 0)          | 1.3 (1.2, 1.4)    | 3.6 (3.3, 3.8)       | 0.1 (0.1, 0.2)    | 1.8 (1.7, 1.9)       | 4.9 (4.6, 5.3)       | 0.5 (0.5, 0.5)    | 14.3 (13.3, 15.3)    | 7.4 (6.9, 8)         | 2.5 (2.3, 2.6)       |
| Cuba                             | 81.6 (75.9, 87.3)       | 1.3 (1.2, 1.4)  | 0.9 (0.8, 0.9)    | 4.4 (4.1, 4.8)    | 10.8 (10, 11.5)      | 0.7 (0.6, 0.7)    | 5.9 (5.5, 6.3)       | 11.5 (10.7, 12.3)    | 0.8 (0.8, 0.9)    | 28.4 (26.4, 30.4)    | 12.9 (12, 13.8)      | 4 (3.7, 4.3)         |
| Dominican Republic               | 78.1 (72.7, 83.6)       | 0.2 (0.2, 0.2)  | 0.7 (0.7, 0.8)    | 2.6 (2.4, 2.7)    | 5.3 (4.9, 5.7)       | 0.3 (0.2, 0.3)    | 3.1 (2.9, 3.3)       | 9.5 (8.8, 10.2)      | 1.5 (1.4, 1.6)    | 27.6 (25.7, 29.6)    | 20.2 (18.8, 21.6)    | 7.1 (6.6, 7.6)       |
| Ecuador                          | 126.9 (121.2, 132.7)    | 0.6 (0.6, 0.6)  | 0.6 (0.6, 0.6)    | 4 (3.8, 4.2)      | 8.4 (8, 8.8)         | 0.4 (0.4, 0.4)    | 5.2 (4.9, 5.4)       | 13.9 (13.3, 14.6)    | 2.5 (2.4, 2.6)    | 47 (44.9, 49.1)      | 32.6 (31.1, 34.1)    | 11.7 (11.2, 12.2)    |
| El Salvador                      | 46.7 (43.5, 50)         | 0.2 (0.1, 0.2)  | 0.5 (0.5, 0.6)    | 1.2 (1.1, 1.3)    | 3.8 (3.5, 4.1)       | 0.2 (0.2, 0.2)    | 1.7 (1.6, 1.8)       | 6.3 (5.8, 6.7)       | 0.9 (0.8, 0.9)    | 16 (14.9, 17.2)      | 11.9 (11.1, 12.8)    | 4.1 (3.8, 4.4)       |
| Grenada                          | 0.8 (0.8, 0.9)          | 0 (0, 0)        | 0 (0, 0)          | 0.1 (0.1, 0.1)    | 0.1 (0.1, 0.1)       | 0 (0, 0)          | 0 (0, 0)             | 0.1 (0.1, 0.1)       | 0 (0, 0)          | 0.2 (0.2, 0.2)       | 0.2 (0.2, 0.2)       | 0.1 (0.1, 0.1)       |
| Guyana                           | 5.7 (5.3, 6.1)          | 0 (0, 0)        | 0 (0, 0)          | 0.2 (0.1, 0.2)    | 0.4 (0.4, 0.4)       | 0 (0, 0)          | 0.2 (0.2, 0.2)       | 0.9 (0.8, 0.9)       | 0.1 (0.1, 0.1)    | 1.9 (1.7, 2)         | 1.5 (1.4, 1.6)       | 0.5 (0.5, 0.6)       |
| Jamaica                          | 21.3 (19.8, 22.8)       | 0 (0, 0)        | 0.1 (0.1, 0.1)    | 1.2 (1.1, 1.3)    | 1.9 (1.8, 2)         | 0.1 (0.1, 0.1)    | 0.8 (0.8, 0.9)       | 3.2 (3, 3.4)         | 0.3 (0.3, 0.4)    | 7.2 (6.7, 7.7)       | 4.8 (4.5, 5.1)       | 1.6 (1.5, 1.7)       |
| Mexico                           | 983.8 (942.5, 1023.7)   | 4.7 (4.5, 4.9)  | 5.8 (5.6, 6.1)    | 35.3 (33.8, 36.7) | 80.1 (76.7, 83.3)    | 2.3 (2.2, 2.4)    | 28.2 (27, 29.4)      | 160.6 (153.9, 167.1) | 17.3 (16.6, 18)   | 320.5 (307.1, 333.6) | 246.6 (236.2, 256.6) | 82.4 (78.9, 85.7)    |
| Nicaragua                        | 47.7 (44.4, 51.1)       | 0.1 (0.1, 0.1)  | 0.2 (0.2, 0.2)    | 0.8 (0.8, 0.9)    | 2.7 (2.5, 2.9)       | 0.1 (0.1, 0.1)    | 1.3 (1.2, 1.4)       | 6.1 (5.7, 6.6)       | 1 (0.9, 1.1)      | 17.5 (16.3, 18.8)    | 13.1 (12.2, 14.1)    | 4.6 (4.3, 5)         |
| Peru                             | 237.4 (220.9, 254.2)    | 0.9 (0.8, 1)    | 1.9 (1.8, 2)      | 9.5 (8.9, 10.2)   | 16.7 (15.6, 17.9)    | 1 (0.9, 1.1)      | 11.9 (11.1, 12.8)    | 25.8 (24, 27.6)      | 4.3 (4, 4.6)      | 92.1 (85.7, 98.6)    | 53.4 (49.7, 57.1)    | 19.9 (18.5, 21.3)    |
| Saint Vincent and the Grenadines | 0.8 (0.7, 0.9)          | 0 (0, 0)        | 0 (0, 0)          | 0 (0, 0.1)        | 0.1 (0.1, 0.1)       | 0 (0, 0)          | 0 (0, 0)             | 0.1 (0.1, 0.1)       | 0 (0, 0)          | 0.2 (0.2, 0.3)       | 0.2 (0.2, 0.2)       | 0.1 (0.1, 0.1)       |
| The Bahamas                      | 2.8 (2.6, 3)            | 0 (0, 0)        | 0 (0, 0)          | 0.3 (0.2, 0.3)    | 0.2 (0.2, 0.2)       | 0 (0, 0)          | 0.1 (0.1, 0.1)       | 0.4 (0.4, 0.5)       | 0 (0, 0)          | 0.9 (0.8, 0.9)       | 0.6 (0.6, 0.7)       | 0.2 (0.2, 0.2)       |
| United States                    | 2227.6 (2072.1, 2386.5) | 38.2 (35.6, 41) | 21.8 (20.3, 23.3) | 8.8 (8.2, 9.5)    | 362.2 (336.9, 388.1) | 12.6 (11.7, 13.5) | 134.8 (125.4, 144.4) | 272.2 (253.2, 291.6) | 25.8 (24, 27.7)   | 815.2 (758.2, 873.3) | 406.1 (377.7, 435)   | 130 (120.9, 139.2)   |
| Uruguay                          | 25 (23.3, 26.8)         | 0.2 (0.2, 0.2)  | 0.4 (0.3, 0.4)    | 1.3 (1.2, 1.4)    | 3.4 (3.2, 3.7)       | 0.2 (0.2, 0.2)    | 1.4 (1.3, 1.5)       | 2.9 (2.7, 3.1)       | 0.3 (0.3, 0.4)    | 8.2 (7.6, 8.8)       | 5 (4.6, 5.3)         | 1.7 (1.6, 1.8)       |
| <b>Eastern Mediterranean</b>     |                         |                 |                   |                   |                      |                   |                      |                      |                   |                      |                      |                      |
| Bahrain                          | 13 (9.1, 17)            | 0 (0, 0.1)      | 0.1 (0.1, 0.2)    | 0.4 (0.3, 0.5)    | 0.5 (0.3, 0.6)       | 0 (0, 0)          | 0.2 (0.1, 0.2)       | 2.3 (1.6, 3)         | 0.2 (0.1, 0.2)    | 6.3 (4.4, 8.3)       | 2.1 (1.5, 2.8)       | 0.8 (0.6, 1.1)       |
| Egypt                            | 906.7 (879.1, 933.3)    | 2.2 (2.1, 2.2)  | 11.8 (11.5, 12.2) | 31 (30, 31.9)     | 53.4 (51.8, 55)      | 1 (1, 1)          | 20.2 (19.5, 20.7)    | 141.8 (137.5, 146)   | 23.9 (23.2, 24.6) | 259.3 (251.4, 266.9) | 254.6 (246.8, 262.1) | 107.5 (104.3, 110.7) |
| Lebanon                          | 52.3 (36.4, 68.3)       | 0.2 (0.1, 0.3)  | 0.6 (0.4, 0.8)    | 1.2 (0.9, 1.6)    | 4.2 (2.9, 5.5)       | 0.1 (0.1, 0.2)    | 1.5 (1, 2)           | 8.5 (5.9, 11.1)      | 0.9 (0.6, 1.2)    | 18.4 (12.8, 24)      | 12.4 (8.6, 16.2)     | 4.2 (2.9, 5.5)       |
| Libya                            | 52.6 (36.6, 68.7)       | 0.5 (0.3, 0.6)  | 0.1 (0.1, 0.2)    | 0.8 (0.6, 1.1)    | 2.7 (1.8, 3.5)       | 0.1 (0, 0.1)      | 0.9 (0.6, 1.2)       | 9.2 (6.4, 12)        | 1 (0.7, 1.3)      | 19.5 (13.5, 25.4)    | 13.3 (9.3, 17.4)     | 4.6 (3.2, 6)         |
| Morocco                          | 282.7 (196.7, 369.1)    | 0.6 (0.4, 0.8)  | 2.4 (1.7, 3.1)    | 4.8 (3.4, 6.3)    | 23.3 (16.2, 30.5)    | 0.5 (0.4, 0.7)    | 9.6 (6.7, 12.6)      | 43.9 (30.6, 57.4)    | 5.4 (3.7, 7)      | 98.6 (68.6, 128.8)   | 68.9 (47.9, 89.9)    | 24.6 (17.1, 32.1)    |
| Pakistan                         | 1692 (1177.4, 2208.9)   | 2.8 (1.9, 3.6)  | 9.9 (6.9, 12.9)   | 39.6 (27.5, 51.7) | 74.4 (51.8, 97.1)    | 2 (1.4, 2.7)      | 37.6 (26.2, 49.1)    | 208 (144.7, 271.5)   | 47.8 (33.3, 62.4) | 539.9 (375.6, 704.8) | 520.2 (361.9, 679.1) | 209.9 (146.1, 274.1) |



|              |                      |                |                |                |                |                |                |                 |                |                  |                 |                 |
|--------------|----------------------|----------------|----------------|----------------|----------------|----------------|----------------|-----------------|----------------|------------------|-----------------|-----------------|
| Qatar        | 22.1 (15.4, 28.8)    | 0.2 (0.1, 0.3) | 0.2 (0.1, 0.2) | 0.5 (0.4, 0.7) | 0.6 (0.4, 0.7) | 0 (0, 0)       | 0.2 (0.2, 0.3) | 4 (2.8, 5.2)    | 0.2 (0.1, 0.3) | 12.5 (8.7, 16.4) | 2.7 (1.9, 3.5)  | 1 (0.7, 1.3)    |
| Saudi Arabia | 225.2 (214.8, 235.7) | 1.8 (1.7, 1.9) | 1.6 (1.6, 1.7) | 5.4 (5.1, 5.6) | 9.1 (8.7, 9.5) | 0.2 (0.2, 0.2) | 3.9 (3.7, 4.1) | 37 (35.3, 38.7) | 4 (3.8, 4.2)   | 94.6 (90.2, 99)  | 48.8 (46.5, 51) | 18.9 (18, 19.7) |

Europe

|                        |                      |                |                |                   |                      |                |                 |                   |                |                      |                   |                   |
|------------------------|----------------------|----------------|----------------|-------------------|----------------------|----------------|-----------------|-------------------|----------------|----------------------|-------------------|-------------------|
| Armenia                | 20 (18.4, 21.6)      | 0.2 (0.2, 0.2) | 0.3 (0.3, 0.4) | 0.6 (0.5, 0.6)    | 2.6 (2.4, 2.8)       | 0.1 (0.1, 0.1) | 1 (0.9, 1.1)    | 3.2 (2.9, 3.4)    | 0.3 (0.3, 0.3) | 6.6 (6, 7.1)         | 3.8 (3.5, 4.1)    | 1.4 (1.3, 1.5)    |
| Austria                | 60.8 (55.9, 65.7)    | 0.3 (0.3, 0.4) | 0.3 (0.3, 0.4) | 3.3 (3, 3.5)      | 10.7 (9.8, 11.5)     | 0.5 (0.5, 0.6) | 4.4 (4, 4.7)    | 7.9 (7.3, 8.6)    | 0.6 (0.5, 0.6) | 21.2 (19.5, 22.9)    | 8.5 (7.8, 9.2)    | 3 (2.7, 3.2)      |
| Belarus                | 63.8 (58.7, 68.9)    | 1 (1, 1.1)     | 1.3 (1.2, 1.4) | 3.6 (3.3, 3.9)    | 9.8 (9, 10.6)        | 0.4 (0.4, 0.4) | 4.2 (3.9, 4.6)  | 9.9 (9.1, 10.7)   | 0.6 (0.6, 0.7) | 19.4 (17.8, 20.9)    | 10 (9.2, 10.8)    | 3.6 (3.3, 3.9)    |
| Belgium                | 78.2 (72, 84.5)      | 1.8 (1.6, 1.9) | 0.5 (0.4, 0.5) | 3.1 (2.9, 3.4)    | 13.6 (12.5, 14.7)    | 0.7 (0.7, 0.8) | 5.7 (5.2, 6.1)  | 9.7 (9, 10.5)     | 0.8 (0.7, 0.9) | 25.1 (23.1, 27.1)    | 13 (11.9, 14)     | 4.2 (3.9, 4.6)    |
| Bosnia and Herzegovina | 22.1 (20.4, 23.9)    | 0.2 (0.2, 0.2) | 0.2 (0.2, 0.2) | 0.7 (0.7, 0.8)    | 4.1 (3.8, 4.4)       | 0.1 (0.1, 0.1) | 1.4 (1.3, 1.5)  | 3.4 (3.2, 3.7)    | 0.2 (0.2, 0.2) | 7.6 (7, 8.2)         | 3.3 (3.1, 3.6)    | 0.9 (0.8, 1)      |
| Bulgaria               | 46.9 (43.1, 50.7)    | 0.4 (0.4, 0.4) | 0.4 (0.3, 0.4) | 2.6 (2.4, 2.8)    | 9.5 (8.7, 10.2)      | 0.4 (0.3, 0.4) | 3.4 (3.1, 3.7)  | 6.8 (6.2, 7.3)    | 0.4 (0.4, 0.5) | 14.4 (13.2, 15.5)    | 6.7 (6.1, 7.2)    | 2.1 (1.9, 2.2)    |
| Croatia                | 27.7 (25.5, 29.9)    | 0.3 (0.3, 0.3) | 0.3 (0.2, 0.3) | 1.5 (1.4, 1.6)    | 5.6 (5.1, 6)         | 0.3 (0.2, 0.3) | 2 (1.9, 2.2)    | 3.8 (3.5, 4.1)    | 0.2 (0.2, 0.3) | 8.6 (7.9, 9.2)       | 4 (3.7, 4.3)      | 1.2 (1.1, 1.3)    |
| Cyprus                 | 8.1 (7.5, 8.8)       | 0.1 (0.1, 0.1) | 0.2 (0.1, 0.2) | 0.5 (0.4, 0.5)    | 1.1 (1, 1.1)         | 0 (0, 0.1)     | 0.5 (0.5, 0.6)  | 0.9 (0.9, 1)      | 0.1 (0.1, 0.1) | 3 (2.8, 3.2)         | 1.4 (1.3, 1.5)    | 0.4 (0.4, 0.5)    |
| Czech Republic         | 72.3 (66.5, 78.1)    | 0.9 (0.8, 1)   | 0.4 (0.4, 0.5) | 4 (3.6, 4.3)      | 13.9 (12.8, 15)      | 0.4 (0.4, 0.5) | 4.5 (4.2, 4.9)  | 10.8 (9.9, 11.6)  | 0.8 (0.7, 0.8) | 22.2 (20.5, 24)      | 10.6 (9.8, 11.5)  | 3.7 (3.4, 4)      |
| Denmark                | 39.1 (36, 42.2)      | 0.6 (0.5, 0.6) | 0.2 (0.2, 0.2) | 1.7 (1.6, 1.8)    | 7.2 (6.6, 7.8)       | 0.3 (0.3, 0.3) | 2.7 (2.5, 2.9)  | 5.2 (4.8, 5.6)    | 0.4 (0.4, 0.4) | 12.4 (11.4, 13.4)    | 6.4 (5.9, 6.9)    | 2.1 (1.9, 2.2)    |
| Estonia                | 9 (8.2, 9.7)         | 0.1 (0.1, 0.2) | 0.1 (0.1, 0.1) | 0.5 (0.5, 0.6)    | 1.7 (1.6, 1.9)       | 0.1 (0.1, 0.1) | 0.6 (0.5, 0.6)  | 1.4 (1.3, 1.5)    | 0.1 (0.1, 0.1) | 2.5 (2.3, 2.7)       | 1.4 (1.3, 1.5)    | 0.5 (0.4, 0.5)    |
| Finland                | 38.2 (37.1, 39.3)    | 0.7 (0.7, 0.7) | 0.2 (0.2, 0.2) | 1.6 (1.6, 1.7)    | 7.4 (7.2, 7.6)       | 0.4 (0.4, 0.4) | 3.3 (3.2, 3.4)  | 4.6 (4.5, 4.8)    | 0.3 (0.3, 0.3) | 11.8 (11.4, 12.1)    | 6.1 (5.9, 6.2)    | 1.8 (1.7, 1.8)    |
| France                 | 464.7 (422.3, 507.2) | 6.8 (6.2, 7.5) | 3.4 (3.1, 3.7) | 18.4 (16.7, 20.1) | 79.7 (72.4, 87)      | 5.4 (4.9, 5.9) | 39.6 (36, 43.2) | 48.4 (44, 52.8)   | 5.3 (4.8, 5.7) | 150.7 (137, 164.5)   | 81.6 (74.1, 89)   | 25.4 (23.1, 27.7) |
| Georgia                | 26.9 (24.8, 29.1)    | 0.3 (0.3, 0.3) | 0.5 (0.4, 0.5) | 0.8 (0.7, 0.8)    | 4.1 (3.8, 4.5)       | 0.2 (0.1, 0.2) | 1.5 (1.4, 1.6)  | 4.4 (4, 4.8)      | 0.4 (0.3, 0.4) | 8.1 (7.5, 8.8)       | 4.9 (4.5, 5.3)    | 1.8 (1.6, 1.9)    |
| Germany                | 573.1 (544.6, 601.6) | 10 (9.5, 10.5) | 3.4 (3.2, 3.6) | 27.3 (25.9, 28.7) | 111.3 (105.8, 116.9) | 6.8 (6.4, 7.1) | 46 (43.7, 48.3) | 70.4 (66.9, 73.9) | 5.4 (5.2, 5.7) | 186.8 (177.5, 196.1) | 78.2 (74.3, 82.1) | 27.4 (26, 28.8)   |
| Greece                 | 70.4 (64.7, 76)      | 0.6 (0.6, 0.7) | 1.4 (1.2, 1.5) | 3.2 (3, 3.5)      | 13.2 (12.1, 14.2)    | 1 (0.9, 1.1)   | 6.1 (5.6, 6.6)  | 8.2 (7.5, 8.8)    | 0.6 (0.5, 0.6) | 23.3 (21.4, 25.2)    | 10.1 (9.3, 10.9)  | 2.7 (2.5, 2.9)    |
| Iceland                | 2.3 (2.1, 2.5)       | 0 (0, 0.1)     | 0 (0, 0)       | 0.2 (0.1, 0.2)    | 0.3 (0.3, 0.4)       | 0 (0, 0)       | 0.2 (0.1, 0.2)  | 0.3 (0.3, 0.3)    | 0 (0, 0)       | 0.7 (0.7, 0.8)       | 0.4 (0.4, 0.5)    | 0.1 (0.1, 0.1)    |
| Ireland                | 33.3 (30.7, 36)      | 0.6 (0.6, 0.7) | 0.2 (0.1, 0.2) | 1.8 (1.7, 2)      | 4.4 (4.1, 4.8)       | 0.2 (0.2, 0.2) | 2 (1.8, 2.1)    | 4.5 (4.1, 4.8)    | 0.4 (0.4, 0.4) | 10.5 (9.6, 11.3)     | 6.7 (6.2, 7.2)    | 2.1 (1.9, 2.2)    |
| Israel                 | 58.4 (53.8, 63.1)    | 0.3 (0.3, 0.3) | 1.4 (1.3, 1.5) | 2.2 (2.1, 2.4)    | 6.2 (5.7, 6.7)       | 0.3 (0.3, 0.3) | 3.1 (2.8, 3.3)  | 5.7 (5.3, 6.2)    | 1.2 (1.1, 1.3) | 17.7 (16.3, 19.1)    | 14.6 (13.5, 15.8) | 5.6 (5.2, 6.1)    |
| Italy                  | 434.1 (334.4, 534.5) | 4.2 (3.2, 5.2) | 4.6 (3.6, 5.7) | 17.4 (13.4, 21.5) | 83.5 (64.3, 102.8)   | 6.3 (4.8, 7.7) | 39.8 (30.6, 49) | 49.8 (38.4, 61.4) | 3.2 (2.4, 3.9) | 150.2 (115.7, 184.9) | 58.7 (45.2, 72.2) | 16.5 (12.7, 20.3) |
| Kyrgyzstan             | 44 (40.5, 47.6)      | 0.4 (0.3, 0.4) | 0.1 (0.1, 0.1) | 2.5 (2.3, 2.7)    | 2.2 (2, 2.4)         | 0.1 (0.1, 0.1) | 1.3 (1.2, 1.4)  | 5.6 (5.2, 6.1)    | 1.2 (1.1, 1.3) | 13.5 (12.5, 14.6)    | 12.1 (11.2, 13.1) | 5 (4.6, 5.4)      |
| Latvia                 | 12.7 (11.7, 13.8)    | 0.1 (0.1, 0.1) | 0.1 (0.1, 0.1) | 0.8 (0.7, 0.8)    | 2.5 (2.3, 2.7)       | 0.1 (0.1, 0.1) | 0.9 (0.8, 1)    | 1.9 (1.8, 2.1)    | 0.1 (0.1, 0.1) | 3.6 (3.3, 3.9)       | 1.8 (1.7, 2)      | 0.8 (0.7, 0.8)    |
| Lithuania              | 18.4 (16.9, 19.8)    | 0.3 (0.3, 0.3) | 0.3 (0.3, 0.3) | 1.1 (1, 1.2)      | 3.6 (3.3, 3.9)       | 0.2 (0.2, 0.2) | 1.3 (1.2, 1.4)  | 2.9 (2.6, 3.1)    | 0.2 (0.2, 0.2) | 5 (4.6, 5.4)         | 2.6 (2.4, 2.8)    | 1 (0.9, 1)        |
| Macedonia              | 14.1 (12.9, 15.2)    | 0.1 (0.1, 0.1) | 0.2 (0.2, 0.2) | 0.6 (0.6, 0.7)    | 2 (1.9, 2.2)         | 0.1 (0.1, 0.1) | 0.8 (0.8, 0.9)  | 2.1 (1.9, 2.3)    | 0.2 (0.1, 0.2) | 5 (4.6, 5.4)         | 2.3 (2.1, 2.5)    | 0.7 (0.7, 0.8)    |
| Moldova                | 27.2 (25.1, 29.4)    | 0.2 (0.2, 0.2) | 0.1 (0.1, 0.1) | 0.5 (0.4, 0.5)    | 3.4 (3.1, 3.7)       | 0.1 (0.1, 0.1) | 1.6 (1.5, 1.8)  | 4.6 (4.3, 5)      | 0.3 (0.3, 0.3) | 10.9 (10, 11.8)      | 4.2 (3.9, 4.5)    | 1.3 (1.2, 1.5)    |

|                 |                           |                   |                   |                     |                        |                   |                      |                         |                      |                         |                         |                      |
|-----------------|---------------------------|-------------------|-------------------|---------------------|------------------------|-------------------|----------------------|-------------------------|----------------------|-------------------------|-------------------------|----------------------|
| Netherlands     | 115.7 (106.4, 124.9)      | 1.7 (1.6, 1.8)    | 0.6 (0.6, 0.7)    | 5.1 (4.7, 5.5)      | 20.8 (19.2, 22.5)      | 0.9 (0.9, 1)      | 9 (8.3, 9.7)         | 14.9 (13.7, 16.1)       | 1.1 (1, 1.2)         | 37.1 (34.1, 40.1)       | 18.6 (17.1, 20.1)       | 5.7 (5.3, 6.2)       |
| Norway          | 36.6 (33.7, 39.5)         | 0.8 (0.7, 0.8)    | 0.3 (0.3, 0.3)    | 1.6 (1.5, 1.7)      | 5.6 (5.2, 6.1)         | 0.3 (0.2, 0.3)    | 2.6 (2.4, 2.8)       | 4.5 (4.2, 4.9)          | 0.4 (0.4, 0.4)       | 12.3 (11.4, 13.3)       | 6.2 (5.7, 6.7)          | 2 (1.8, 2.2)         |
| Poland          | 255.5 (235, 275.9)        | 2.4 (2.2, 2.6)    | 2 (1.8, 2.1)      | 10.6 (9.8, 11.5)    | 46.1 (42.4, 49.8)      | 2 (1.8, 2.1)      | 18.2 (16.8, 19.7)    | 35.3 (32.4, 38.1)       | 2.6 (2.4, 2.8)       | 87.2 (80.2, 94.1)       | 36.7 (33.8, 39.6)       | 12.5 (11.5, 13.5)    |
| Portugal        | 68.8 (63.3, 74.3)         | 0.8 (0.8, 0.9)    | 0.7 (0.6, 0.7)    | 3.4 (3.1, 3.7)      | 13.8 (12.7, 14.9)      | 0.8 (0.7, 0.9)    | 5.7 (5.2, 6.1)       | 9.6 (8.9, 10.4)         | 0.6 (0.5, 0.6)       | 21.3 (19.6, 23)         | 9.5 (8.7, 10.2)         | 2.7 (2.4, 2.9)       |
| Romania         | 129.9 (119.5, 140.2)      | 1.3 (1.2, 1.5)    | 1.2 (1.1, 1.3)    | 6.1 (5.6, 6.6)      | 23 (21.2, 24.9)        | 1.1 (1, 1.2)      | 9.6 (8.8, 10.4)      | 17.6 (16.2, 19)         | 1.2 (1.1, 1.3)       | 42.5 (39.1, 45.9)       | 19.9 (18.3, 21.5)       | 6.2 (5.7, 6.7)       |
| Serbia          | 59 (54.3, 63.7)           | 0.5 (0.5, 0.6)    | 0.4 (0.4, 0.4)    | 1.8 (1.6, 1.9)      | 10.8 (9.9, 11.6)       | 0.3 (0.3, 0.4)    | 3.8 (3.5, 4.1)       | 8.1 (7.5, 8.8)          | 0.5 (0.5, 0.6)       | 20.4 (18.7, 22)         | 9.4 (8.7, 10.2)         | 2.8 (2.6, 3)         |
| Slovakia        | 36.9 (33.9, 39.8)         | 0.1 (0.1, 0.1)    | 0.3 (0.2, 0.3)    | 2 (1.9, 2.2)        | 6 (5.5, 6.4)           | 0.2 (0.2, 0.2)    | 2.4 (2.2, 2.6)       | 5.4 (5, 5.8)            | 0.4 (0.4, 0.4)       | 12.7 (11.7, 13.7)       | 5.4 (5, 5.8)            | 1.9 (1.7, 2)         |
| Slovenia        | 14 (12.9, 15.2)           | 0.2 (0.2, 0.2)    | 0.1 (0.1, 0.1)    | 0.7 (0.6, 0.8)      | 2.7 (2.5, 2.9)         | 0.1 (0.1, 0.1)    | 1.1 (1, 1.2)         | 1.9 (1.7, 2)            | 0.1 (0.1, 0.1)       | 4.5 (4.1, 4.8)          | 2 (1.8, 2.2)            | 0.7 (0.6, 0.7)       |
| Spain           | 347.4 (332.9, 362.3)      | 3.3 (3.2, 3.5)    | 2.7 (2.6, 2.8)    | 18.5 (17.8, 19.3)   | 58.4 (55.9, 60.9)      | 4.1 (3.9, 4.3)    | 28.8 (27.6, 30)      | 43.5 (41.7, 45.4)       | 2.7 (2.6, 2.9)       | 121.1 (116, 126.3)      | 49.8 (47.8, 52)         | 14.4 (13.8, 15)      |
| Sweden          | 65.8 (62.2, 69.6)         | 1 (1, 1.1)        | 0.3 (0.3, 0.3)    | 2.8 (2.6, 2.9)      | 11.9 (11.3, 12.6)      | 0.6 (0.5, 0.6)    | 4.6 (4.3, 4.8)       | 8.6 (8.1, 9.1)          | 0.8 (0.7, 0.8)       | 20.7 (19.5, 21.8)       | 10.8 (10.2, 11.4)       | 3.8 (3.6, 4.1)       |
| Switzerland     | 58.4 (53.7, 63.1)         | 1.3 (1.2, 1.4)    | 0.3 (0.2, 0.3)    | 2.6 (2.4, 2.8)      | 9.6 (8.9, 10.4)        | 0.5 (0.5, 0.6)    | 4.6 (4.2, 5)         | 7.2 (6.6, 7.7)          | 0.6 (0.5, 0.6)       | 20.4 (18.8, 22)         | 8.3 (7.6, 9)            | 3 (2.8, 3.2)         |
| Tajikistan      | 64.4 (59.2, 69.5)         | 0.4 (0.4, 0.5)    | 0.1 (0.1, 0.1)    | 1 (1, 1.1)          | 2.4 (2.2, 2.6)         | 0.1 (0.1, 0.1)    | 1.3 (1.2, 1.4)       | 8.2 (7.5, 8.8)          | 2 (1.8, 2.1)         | 20.4 (18.8, 22)         | 19.5 (18, 21.1)         | 9 (8.3, 9.7)         |
| Ukraine         | 295.2 (271.6, 318.8)      | 2.8 (2.6, 3.1)    | 3.1 (2.8, 3.3)    | 10.9 (10.1, 11.8)   | 48 (44.2, 51.9)        | 2.1 (1.9, 2.2)    | 19.7 (18.1, 21.3)    | 48.7 (44.8, 52.6)       | 2.6 (2.4, 2.8)       | 98.5 (90.6, 106.4)      | 44.7 (41.1, 48.3)       | 14 (12.9, 15.1)      |
| United Kingdom  | 490.8 (411.4, 570.9)      | 5.4 (4.5, 6.3)    | 2.1 (1.8, 2.5)    | 23.3 (19.5, 27.1)   | 80.5 (67.5, 93.6)      | 4.1 (3.5, 4.8)    | 35.1 (29.5, 40.9)    | 62.4 (52.3, 72.6)       | 5.4 (4.5, 6.3)       | 162.8 (136.4, 189.3)    | 81.7 (68.5, 95.1)       | 27.8 (23.3, 32.4)    |
| South-East Asia |                           |                   |                   |                     |                        |                   |                      |                         |                      |                         |                         |                      |
| Bhutan          | 5.7 (5.5, 6)              | 0 (0, 0)          | 0 (0, 0)          | 0.1 (0.1, 0.1)      | 0.3 (0.3, 0.3)         | 0 (0, 0)          | 0.2 (0.2, 0.2)       | 0.7 (0.6, 0.7)          | 0.1 (0.1, 0.1)       | 2.4 (2.3, 2.5)          | 1.4 (1.4, 1.5)          | 0.5 (0.4, 0.5)       |
| India           | 10281 (9853.2, 10722.6)   | 26.6 (25.5, 27.7) | 36.9 (35.4, 38.5) | 1.7 (1.6, 1.8)      | 641.8 (615.1, 669.4)   | 21.5 (20.6, 22.4) | 376.8 (361.1, 393)   | 1570.7 (1505.3, 1638.1) | 183.6 (175.9, 191.5) | 4050.2 (3881.6, 4224.1) | 2552.8 (2446.5, 2662.4) | 818.5 (784.5, 853.7) |
| North Korea     | 192.1 (184.1, 200.3)      | 1.6 (1.5, 1.6)    | 1.4 (1.3, 1.4)    | 1.2 (1.1, 1.2)      | 18.6 (17.8, 19.4)      | 0.7 (0.7, 0.7)    | 9.7 (9.3, 10.1)      | 31.7 (30.4, 33)         | 2.7 (2.6, 2.8)       | 62.1 (59.5, 64.7)       | 37.3 (35.7, 38.9)       | 12.7 (12.1, 13.2)    |
| Thailand        | 520 (498.4, 542.3)        | 1.9 (1.8, 1.9)    | 5 (4.8, 5.2)      | 29.6 (28.4, 30.9)   | 60.6 (58.1, 63.2)      | 3.3 (3.1, 3.4)    | 36 (34.5, 37.6)      | 82.3 (78.9, 85.9)       | 5.4 (5.2, 5.6)       | 182.1 (174.5, 189.9)    | 87.7 (84.1, 91.5)       | 26.1 (25, 27.2)      |
| Timor-Leste     | 9.8 (9.4, 10.2)           | 0 (0, 0)          | 0 (0, 0)          | 0.1 (0.1, 0.1)      | 0.4 (0.4, 0.4)         | 0 (0, 0)          | 0.2 (0.2, 0.2)       | 1.2 (1.2, 1.3)          | 0.3 (0.3, 0.3)       | 3 (2.9, 3.1)            | 3.3 (3.1, 3.4)          | 1.3 (1.2, 1.3)       |
| Western Pacific |                           |                   |                   |                     |                        |                   |                      |                         |                      |                         |                         |                      |
| Australia       | 206.3 (203, 209.6)        | 3.3 (3.3, 3.4)    | 0.9 (0.9, 0.9)    | 13.6 (13.4, 13.9)   | 28.3 (27.9, 28.8)      | 1.6 (1.6, 1.6)    | 15 (14.7, 15.2)      | 21.3 (20.9, 21.6)       | 2.6 (2.6, 2.6)       | 69.1 (68, 70.2)         | 37.3 (36.7, 37.9)       | 13.2 (13, 13.4)      |
| Brunei          | 3.2 (2.8, 3.6)            | 0 (0, 0)          | 0.1 (0.1, 0.1)    | 0.2 (0.2, 0.2)      | 0.2 (0.2, 0.2)         | 0 (0, 0)          | 0.1 (0.1, 0.1)       | 0.5 (0.5, 0.6)          | 0 (0, 0.1)           | 1.1 (1, 1.2)            | 0.7 (0.6, 0.8)          | 0.2 (0.2, 0.3)       |
| Cambodia        | 122.4 (108.2, 136.8)      | 0.1 (0.1, 0.1)    | 1.9 (1.6, 2.1)    | 1.7 (1.5, 1.9)      | 5.7 (5.1, 6.4)         | 0.1 (0.1, 0.2)    | 3.4 (3, 3.8)         | 16.8 (14.9, 18.8)       | 2.7 (2.4, 3.1)       | 43.4 (38.3, 48.5)       | 33.9 (29.9, 37.8)       | 12.7 (11.2, 14.1)    |
| China           | 10305.6 (7829.9, 12795.6) | 47.8 (36.3, 59.4) | 33.6 (25.5, 41.7) | 104.4 (79.3, 129.6) | 1004.1 (762.9, 1246.8) | 50.4 (38.3, 62.6) | 733.9 (557.6, 911.2) | 1513.8 (1150.1, 1879.5) | 112.3 (85.3, 139.5)  | 4371 (3321, 5427.1)     | 1750.6 (1330.1, 2173.6) | 583.7 (443.4, 724.7) |
| Fiji            | 6.6 (5.8, 7.3)            | 0 (0, 0)          | 0.1 (0.1, 0.1)    | 0.3 (0.2, 0.3)      | 0.5 (0.4, 0.6)         | 0 (0, 0)          | 0.1 (0.1, 0.1)       | 1.5 (1.3, 1.7)          | 0.1 (0.1, 0.2)       | 1.6 (1.4, 1.8)          | 1.7 (1.5, 1.9)          | 0.6 (0.6, 0.7)       |
| Japan           | 925.8 (818.3, 1034.6)     | 13.5 (11.9, 15.1) | 4 (3.6, 4.5)      | 57.8 (51.1, 64.6)   | 201.5 (178.1, 225.2)   | 17.6 (15.6, 19.7) | 98.6 (87.2, 110.2)   | 107.5 (95.1, 120.2)     | 6.9 (6.1, 7.7)       | 266.9 (235.9, 298.2)    | 117.4 (103.7, 131.2)    | 34.1 (30.1, 38.1)    |
| Laos            | 53.3 (47.1, 59.5)         | 0.1 (0.1, 0.1)    | 0 (0, 0)          | 0.5 (0.4, 0.5)      | 2.4 (2.1, 2.6)         | 0.1 (0, 0.1)      | 1.2 (1.1, 1.3)       | 7.6 (6.7, 8.5)          | 1.3 (1.1, 1.4)       | 18.9 (16.7, 21.2)       | 15.6 (13.8, 17.4)       | 5.7 (5, 6.3)         |

|             |                      |                |                   |                   |                   |                |                   |                     |                   |                      |                      |                   |
|-------------|----------------------|----------------|-------------------|-------------------|-------------------|----------------|-------------------|---------------------|-------------------|----------------------|----------------------|-------------------|
| Mongolia    | 24 (21.2, 26.8)      | 0.2 (0.1, 0.2) | 0.1 (0.1, 0.1)    | 0.9 (0.8, 1)      | 1.1 (1, 1.2)      | 0 (0, 0)       | 0.6 (0.5, 0.7)    | 3.3 (2.9, 3.7)      | 0.6 (0.5, 0.6)    | 8.4 (7.4, 9.3)       | 6.1 (5.4, 6.8)       | 2.7 (2.4, 3)      |
| Philippines | 802.1 (709, 896.4)   | 4.4 (3.9, 5)   | 2.4 (2.1, 2.6)    | 28.7 (25.3, 32)   | 46 (40.7, 51.4)   | 1.2 (1.1, 1.4) | 21.8 (19.3, 24.4) | 119 (105.2, 133)    | 16.5 (14.6, 18.4) | 257.8 (227.9, 288.1) | 228.7 (202.1, 255.5) | 75.6 (66.8, 84.5) |
| Singapore   | 39.7 (37.7, 41.8)    | 0.3 (0.3, 0.4) | 0.6 (0.6, 0.6)    | 5.6 (5.3, 5.9)    | 4.9 (4.6, 5.1)    | 0.2 (0.2, 0.2) | 3.3 (3.1, 3.4)    | 5.9 (5.6, 6.2)      | 0.3 (0.3, 0.4)    | 12.1 (11.5, 12.7)    | 4.8 (4.5, 5)         | 1.7 (1.6, 1.8)    |
| South Korea | 409.1 (394.3, 424)   | 4 (3.8, 4.1)   | 30.3 (29.2, 31.4) | 19.5 (18.8, 20.2) | 58.1 (55.9, 60.2) | 3.2 (3, 3.3)   | 33.5 (32.3, 34.7) | 57.7 (55.6, 59.8)   | 2.6 (2.5, 2.7)    | 131.3 (126.6, 136.1) | 54.1 (52.2, 56.1)    | 14.9 (14.3, 15.4) |
| Vietnam     | 712.5 (629.8, 796.2) | 1.6 (1.4, 1.8) | 4 (3.5, 4.5)      | 35.4 (31.3, 39.6) | 55.6 (49.1, 62.1) | 2.7 (2.4, 3)   | 29.5 (26, 32.9)   | 106.1 (93.8, 118.5) | 11.9 (10.5, 13.3) | 259.2 (229.1, 289.6) | 149.8 (132.4, 167.4) | 56.7 (50.1, 63.4) |

**Table. S9. Vaccine capacity of phase III COVID-19 candidate vaccines as announced by their manufacturers.**

| <b>Vaccine</b> | <b>COVID-19 Vaccine developer/manufacturer</b> | <b>Year</b> | <b>Amount (billion)</b> | <b>Reference</b>                                                                                                                                                                                                                                                                                                                                                    |
|----------------|------------------------------------------------|-------------|-------------------------|---------------------------------------------------------------------------------------------------------------------------------------------------------------------------------------------------------------------------------------------------------------------------------------------------------------------------------------------------------------------|
| BNT162         | Pfizer                                         | 2020/2021   | 0.1/1.3                 | <a href="https://www.pfizer.com/news/press-release/press-release-detail/pfizer-and-biontech-announce-vaccine-candidate-against">https://www.pfizer.com/news/press-release/press-release-detail/pfizer-and-biontech-announce-vaccine-candidate-against</a>                                                                                                           |
| mRNA-1273      | Moderna, NIAID                                 | 2021        | 0.5~1                   | <a href="https://investors.modernatx.com/news-releases/news-release-details/moderna-announces-supply-agreement-ministry-public-health-supply">https://investors.modernatx.com/news-releases/news-release-details/moderna-announces-supply-agreement-ministry-public-health-supply</a>                                                                               |
| Gam-COVID-Vac  | Gamaleya Research Institute                    | 2021        | 0.5                     | <a href="https://sputnikvaccine.com/chn/newsroom/glava-voz-v-evrope-uveren-v-uspehe-tretej-fazy-issledovaniya-sputnik-v/">https://sputnikvaccine.com/chn/newsroom/glava-voz-v-evrope-uveren-v-uspehe-tretej-fazy-issledovaniya-sputnik-v/;</a><br><a href="http://sputniknews.cn/society/202010201032337670/">http://sputniknews.cn/society/202010201032337670/</a> |
| Ad26.COV2.S    | Janssen Pharmaceutical Companies               | 2021        | 1                       | <a href="https://www.jnj.com/johnson-johnson-initiates-pivotal-global-phase-3-clinical-trial-of-janssens-covid-19-vaccine-candidate">https://www.jnj.com/johnson-johnson-initiates-pivotal-global-phase-3-clinical-trial-of-janssens-covid-19-vaccine-candidate</a>                                                                                                 |
| NVX-CoV2373    | Novavax                                        | 2021        | 2                       | <a href="https://ir.novavax.com/node/15226/pdf">https://ir.novavax.com/node/15226/pdf</a>                                                                                                                                                                                                                                                                           |

|                          |                                                                                                        |           |                  |                                                                                                                                                                                                                                                                                                                                                                                                                         |
|--------------------------|--------------------------------------------------------------------------------------------------------|-----------|------------------|-------------------------------------------------------------------------------------------------------------------------------------------------------------------------------------------------------------------------------------------------------------------------------------------------------------------------------------------------------------------------------------------------------------------------|
| ChAdOx1<br>nCoV-19       | AstraZeneca                                                                                            | 2020/2021 | 0.4/3            | <a href="https://www.astrazeneca.com/media-centre/press-releases/2020/astrazeneca-concludes-agreement-with-the-european-commission-for-the-supply-of-up-to-400-million-doses-of-azd1222-covid-19-vaccine.html">https://www.astrazeneca.com/media-centre/press-releases/2020/astrazeneca-concludes-agreement-with-the-european-commission-for-the-supply-of-up-to-400-million-doses-of-azd1222-covid-19-vaccine.html</a> |
| BBIBP-CorV<br>/WIBP*     | Sinopharm                                                                                              | 2021      | 1                | <a href="http://www.sinopharm.com/s/1223-4126-38630.html">http://www.sinopharm.com/s/1223-4126-38630.html</a>                                                                                                                                                                                                                                                                                                           |
| CoronaVac*               | Sinovac, Instituto Butantan                                                                            | 2021      | 0.18             | <a href="https://revistapesquisa.fapesp.br/para-ganhar-tempo/">https://revistapesquisa.fapesp.br/para-ganhar-tempo/</a>                                                                                                                                                                                                                                                                                                 |
| Anhui Zhifei<br>vaccine* | Anhui Zhifei Longcom<br>Biopharmaceutical/Institute<br>of Microbiology, Chinese<br>Academy of Sciences | 2021      | Not<br>available | Not available                                                                                                                                                                                                                                                                                                                                                                                                           |
| Ad5-nCoV*                | CanSino Biological Inc                                                                                 | 2021      | Not<br>available | Not available                                                                                                                                                                                                                                                                                                                                                                                                           |
| COVAXIN                  | Bharat Biotech                                                                                         | 2021      | 1                | <a href="https://www.bharatbiotech.com/images/press/Bharat-Biotech-Inks-licensing-deal-with-washington-university-school-to-advance-COVID-19-intranasal-vaccine.pdf">https://www.bharatbiotech.com/images/press/Bharat-Biotech-Inks-licensing-deal-with-washington-university-school-to-advance-COVID-19-intranasal-vaccine.pdf</a>                                                                                     |

\*: The Chinese government has announced that the production capacity for those four vaccines in China is expected to reach 0.61 billion doses in 2020 and up to 1 billion in 2021.

**Table. S10. Summary of the inclusion and exclusion criteria for clinical trials of COVID-19 vaccine, regarding measurement of pre-existing antibody in clinical trials.**

| <b>Vaccine</b> | <b>Inclusion and exclusion criteria</b>                                               | <b>Reference</b>                                                                                                                                                                                                                                                                                                                                                                                                                            |
|----------------|---------------------------------------------------------------------------------------|---------------------------------------------------------------------------------------------------------------------------------------------------------------------------------------------------------------------------------------------------------------------------------------------------------------------------------------------------------------------------------------------------------------------------------------------|
| CoronaVac      | Anyone who tests positive in serum IgG or IgM antibodies to SARS-CoV-2 were excluded. | 1. Yanjun Zhang et al. Immunogenicity and Safety of a SARS-CoV-2 Inactivated Vaccine in Healthy Adults Aged 18-59 years: Report of the Randomized, Double-blind, and Placebo-controlled Phase 2 Clinical Trial, MedRxiv.                                                                                                                                                                                                                    |
| Ad5-nCoV       | Anyone who tests positive in serum IgG or IgM antibodies to SARS-CoV-2 were excluded. | 1. Feng-Cai Zhu et al. Safety, tolerability, and immunogenicity of a recombinant adenovirus type-5 vectored COVID-19 vaccine: a dose-escalation, open-label, non-randomised, first-in-human trial, Lancet.<br>2. Feng-Cai Zhu et al. Immunogenicity and safety of a recombinant adenovirus type-5-vectored COVID-19 vaccine in healthy adults aged 18 years or older: a randomised, double-blind, placebocontrolled, phase 2 trial, Lancet. |
| BBIBP-CorV     | Anyone who tests positive in serum IgG or IgM antibodies to SARS-CoV-2 were excluded. | 1. Shengli Xia et al. Safety and immunogenicity of an inactivated SARS-CoV-2 vaccine, BBIBP-CorV: a randomised, double-blind, placebo-controlled, phase 1/2 trial, Lancet Infect Dis.                                                                                                                                                                                                                                                       |
| WBIP           | Anyone who tests positive in serum IgG or IgM antibodies to                           | 1. Shengli Xia et al. Effect of an Inactivated Vaccine Against                                                                                                                                                                                                                                                                                                                                                                              |

SARS-CoV-2 were excluded.

SARS-CoV-2 on Safety and Immunogenicity Outcomes, JAMA.

|                       |                                                                                                                                                                                                                           |                                                                                                                                                                                                                                                                                                                                                  |
|-----------------------|---------------------------------------------------------------------------------------------------------------------------------------------------------------------------------------------------------------------------|--------------------------------------------------------------------------------------------------------------------------------------------------------------------------------------------------------------------------------------------------------------------------------------------------------------------------------------------------|
| Ad26.COVS.S           | All participants were screened by locally available serological assays for detection of previous infection with SARS-CoV-2 with a maximum of 25 seropositive participants allowed between Cohort 1a and Cohort 3 (N=771). | 1. Jerald Sadoff et al. Safety and immunogenicity of the Ad26.COVS.S COVID-19 vaccine candidate: interim results 1 of a phase 1/2a, double-blind, randomized, placebo-controlled trial, MedRxiv.                                                                                                                                                 |
| Gam-COVID-Vac         | Included adult volunteers who had a negative RT-PCR results and tested negative in IgG and IgM antibodies to SARS-CoV-2.                                                                                                  | 1. Denis Y Logunov et al. Safety and immunogenicity of an rAd26 and rAd5 vector-based heterologous prime-boost COVID-19 vaccine in two formulations: two open, non-randomised phase 1/2 studies from Russia, Lancet.                                                                                                                             |
| BNT162b1,<br>BNT162b2 | Anyone who tests positive in serum IgG or IgM antibodies to SARS-CoV-2 at the screening visit was excluded.                                                                                                               | 1. Mark J. Mulligan et al. Phase I/II study of COVID-19 RNA vaccine BNT162b1 in adults, Nature.<br>2. Ugur Sahin et al. COVID-19 vaccine BNT162b1 elicits human antibody and TH1 T-cell responses, Nature.<br>3. Edward E. Walsh et al. Safety and Immunogenicity of Two RNA-Based Covid-19 Vaccine Candidates, New England Journal of Medicine. |
| mRNA-1273             | The confirmation of SARS-CoV-2 infection was not performed by serology test or RT-PCR test before enrollment.                                                                                                             | 1. L.A. Jackson et al. An mRNA Vaccine against SARS-CoV-2 Preliminary Report, New England Journal of Medicine.<br>2. E.J. Anderson et al. Safety and Immunogenicity of SARS-CoV-2 mRNA-1273 Vaccine in Older Adults, New England                                                                                                                 |

|                 |                                                                                                                                                                                      |                                                                                                                                                                                                  |
|-----------------|--------------------------------------------------------------------------------------------------------------------------------------------------------------------------------------|--------------------------------------------------------------------------------------------------------------------------------------------------------------------------------------------------|
| NVX-CoV2373     | Anyone who tested positive at screening by RT-PCR or ELISA along with participants exposed to persons with confirmed SARS-CoV-2 were excluded.                                       | Journal of Medicine.<br>1. C. Keech et al. Phase 1–2 Trial of a SARS-CoV-2 Recombinant Spike Protein Nanoparticle Vaccine, New England Journal of Medicine.                                      |
| ChAdOx1 nCoV-19 | Participants who had a history of laboratory confirmed COVID-19 or seropositivity for SARS-CoV-2 at screening once an antibody test became available were included before enrolment. | 1. Pedro M Folegatti et al. Safety and immunogenicity of the ChAdOx1 nCoV-19 vaccine against SARS-CoV-2: a preliminary report of a phase 1/2, single-blind, randomised controlled trial, Lancet. |

---



**Figure. S1. Global and regional estimates of potential acceptance of a COVID-19 vaccine.**

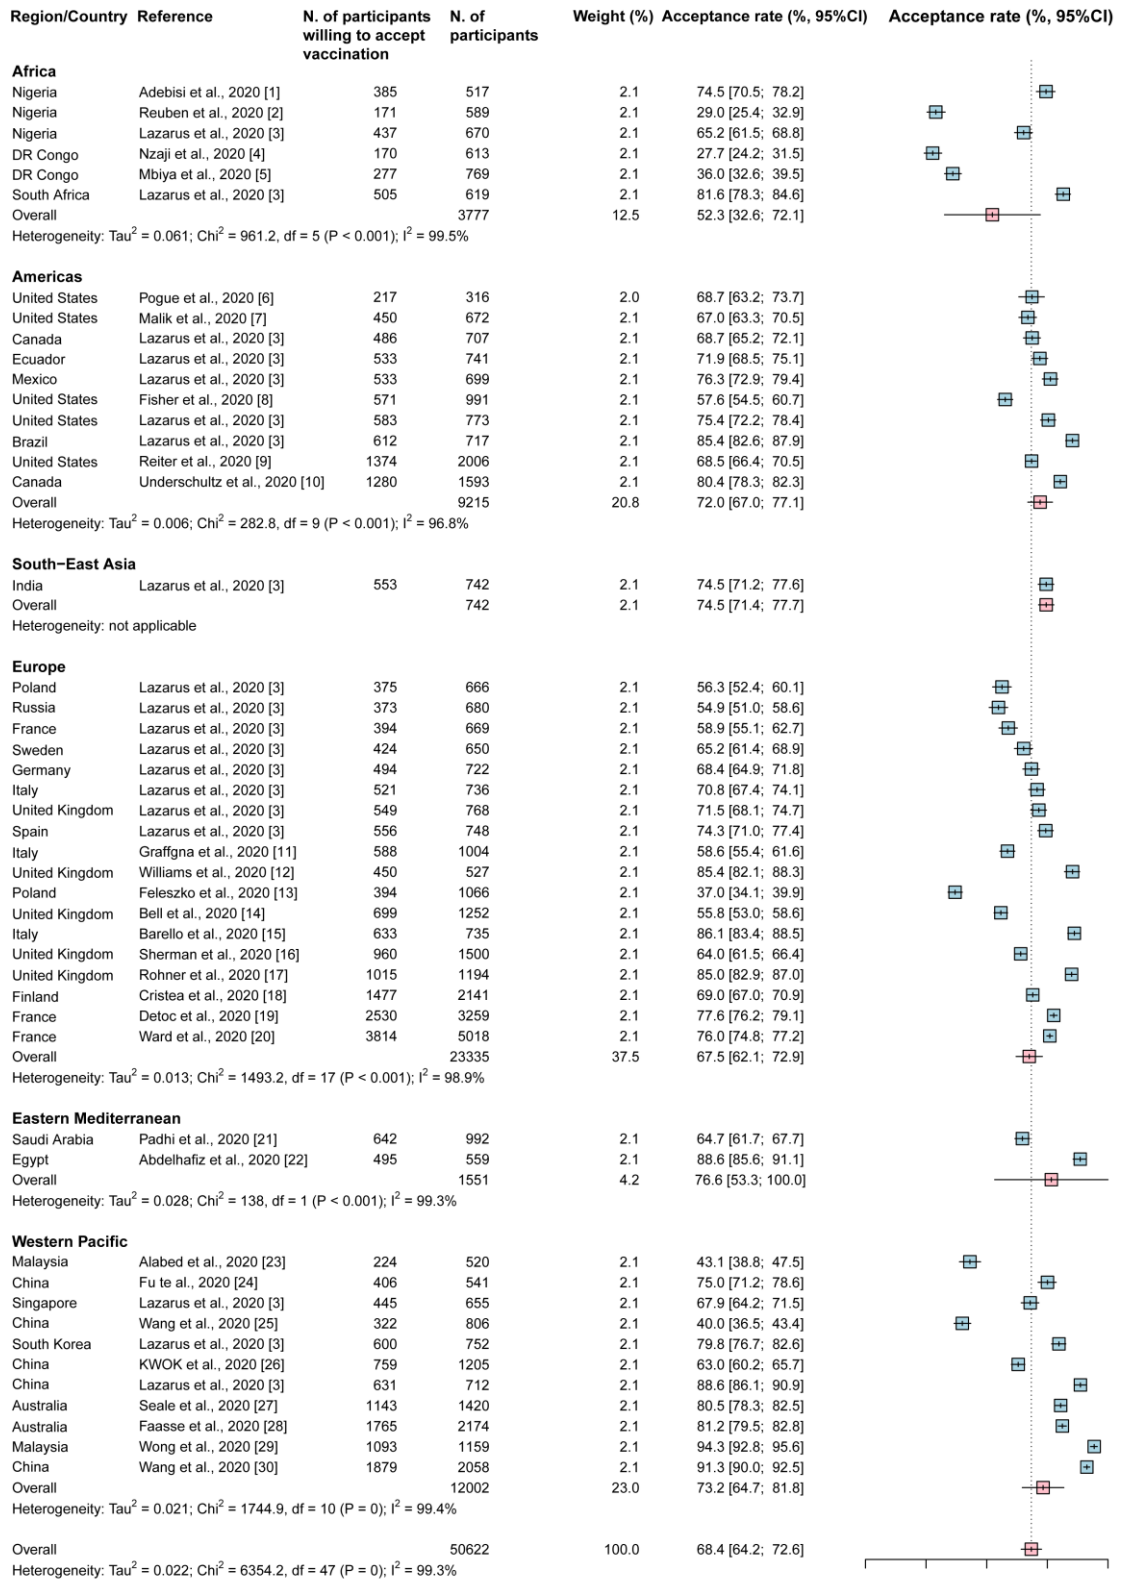

**Figure. S2. Age distribution of target populations for COVID-19 vaccination program across regions, by goals of vaccination program.**

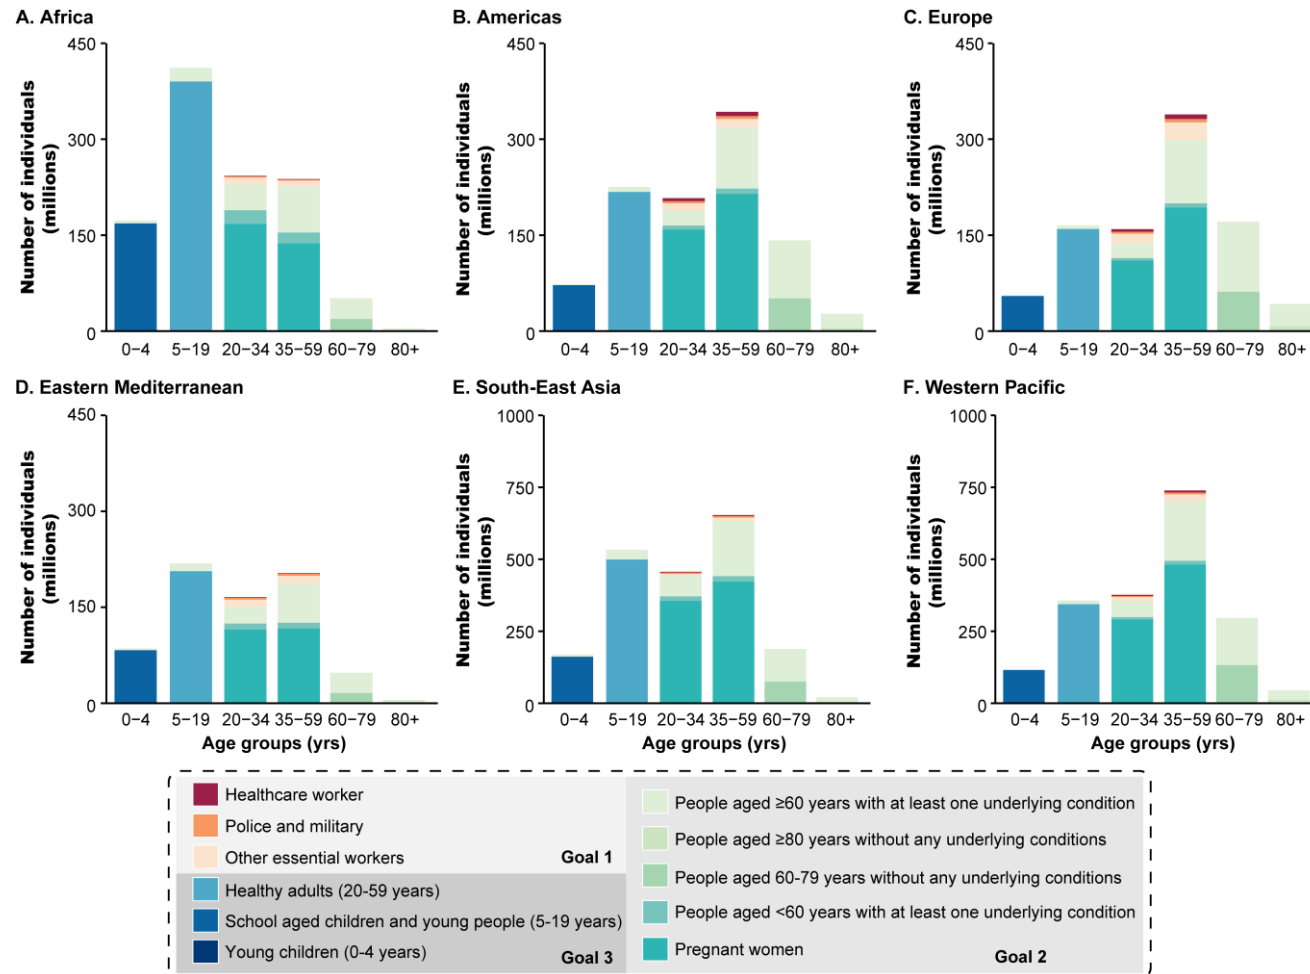

**Figure. S3. National estimates of the size of each target population for COVID-19 vaccination in Africa, Americas and Western Pacific regions, by goals of vaccination program.**

Note that three letters on the x-axis are ISO Alpha 3 Code.

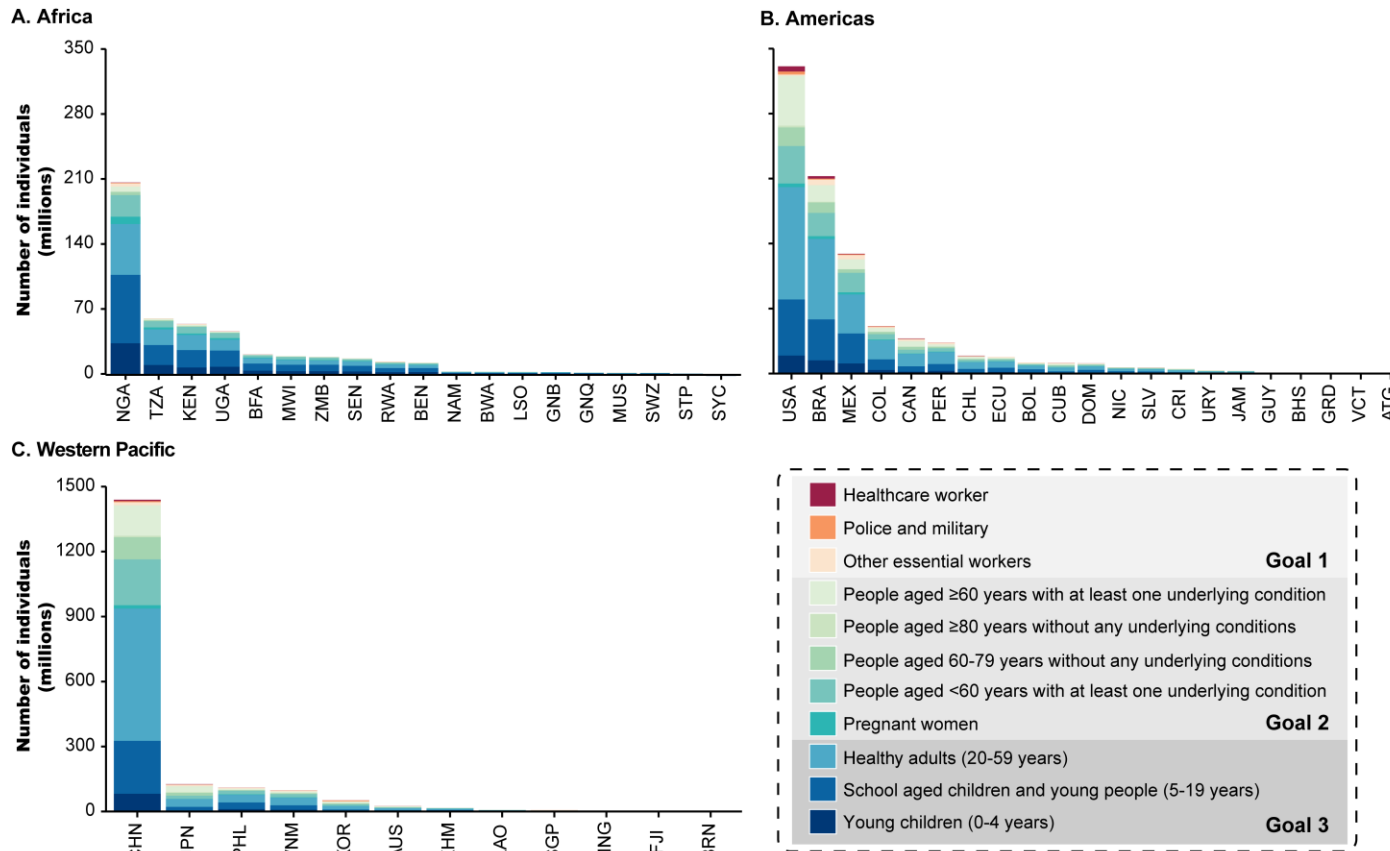

**Figure. S4. National estimates of the size of each target population for COVID-19 vaccination in Europe, Eastern Mediterranean and South-East Asia regions, by goals of vaccination program.**

Note that three letters on the x-axis are ISO Alpha 3 Code.

**A. Europe**

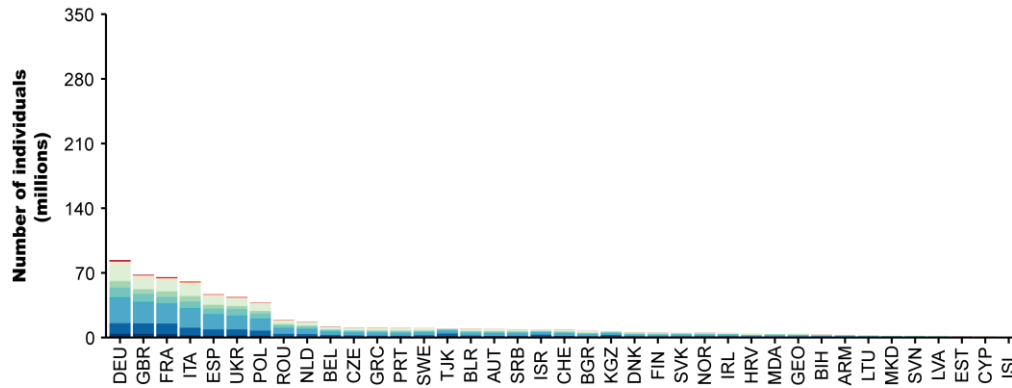

**B. Eastern Mediterranean**

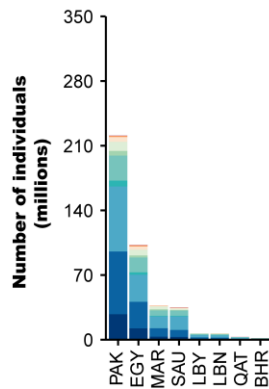

**C. South-East Asia**

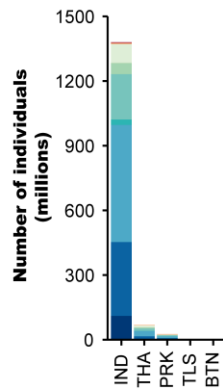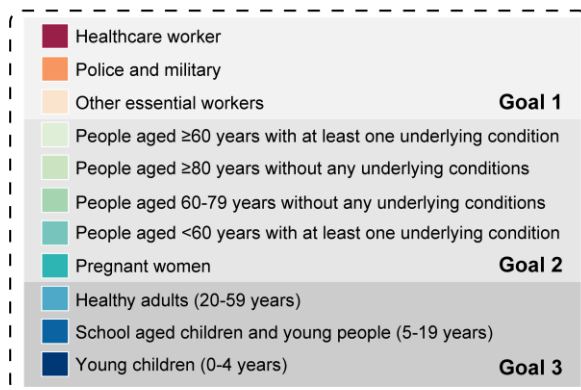

**Figure. S5. Proportion of each target population for COVID-19 vaccination in Africa, Americas and Western Pacific regions.**  
 Note that three letters on the x-axis are ISO Alpha 3 Code.

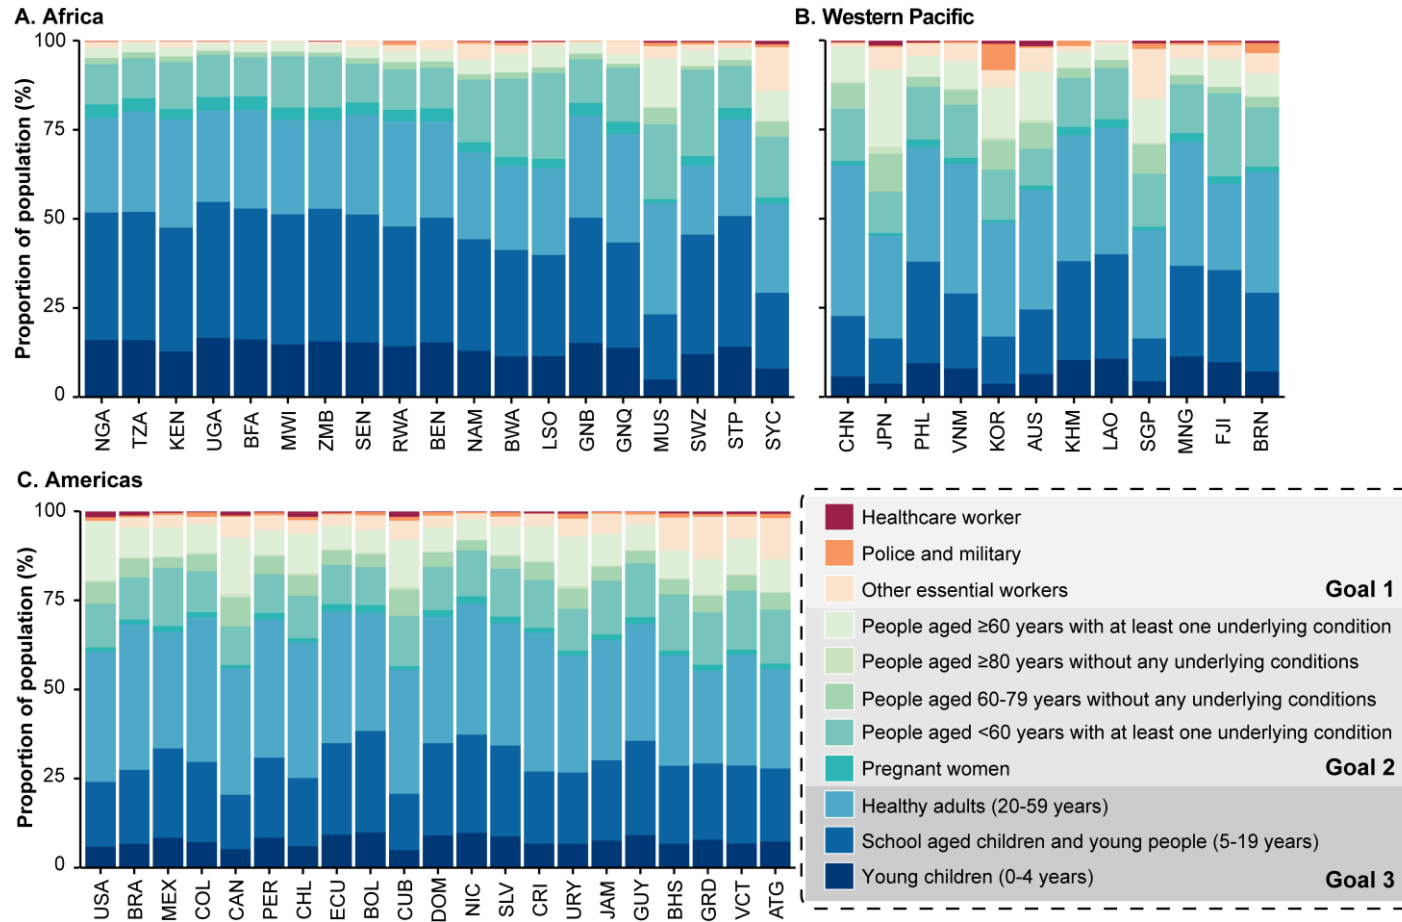

**Figure. S6. Proportion of each target population for COVID-19 vaccination in Europe, Eastern Mediterranean and South–East Asia regions.**

Note that three letters on the x-axis are ISO Alpha 3 Code.

**A. Europe**

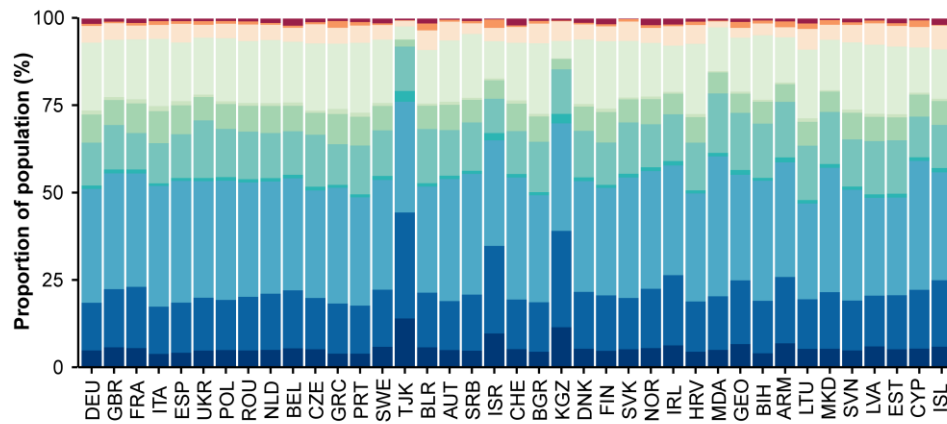

**B. Eastern Mediterranean**

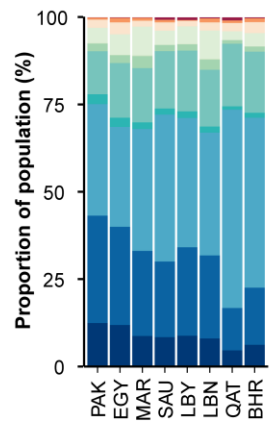

**C. South-East Asia**

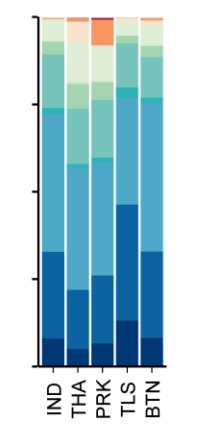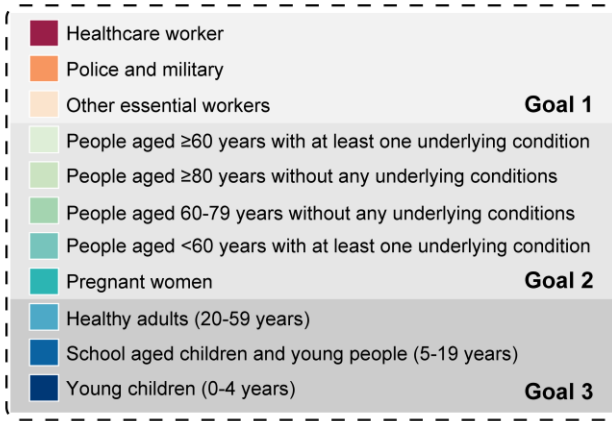

**Figure. S7. The size of essential workers in 104 countries data on each target population from official statistics.**

Note that the grey color refers to there is no data available on each target population.

**A. Target population to maintain an effective healthcare system**

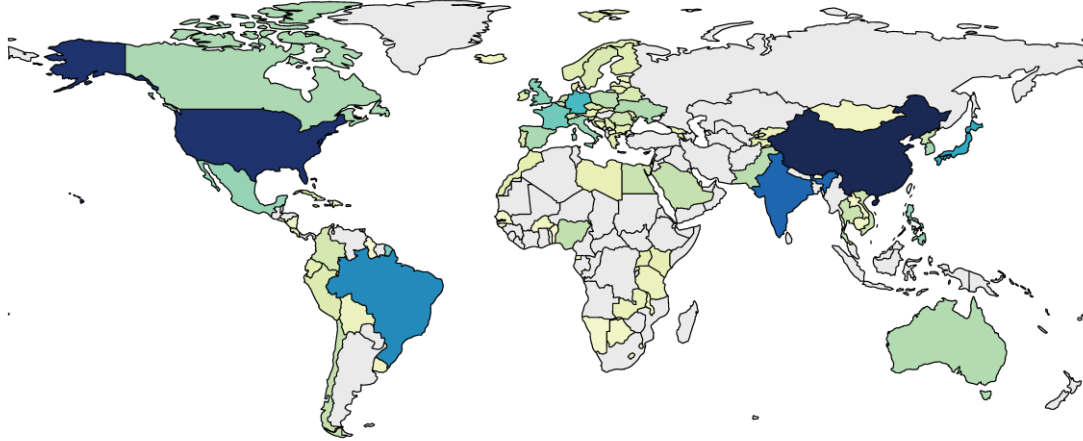

**B. Target population to maintain national and social security**

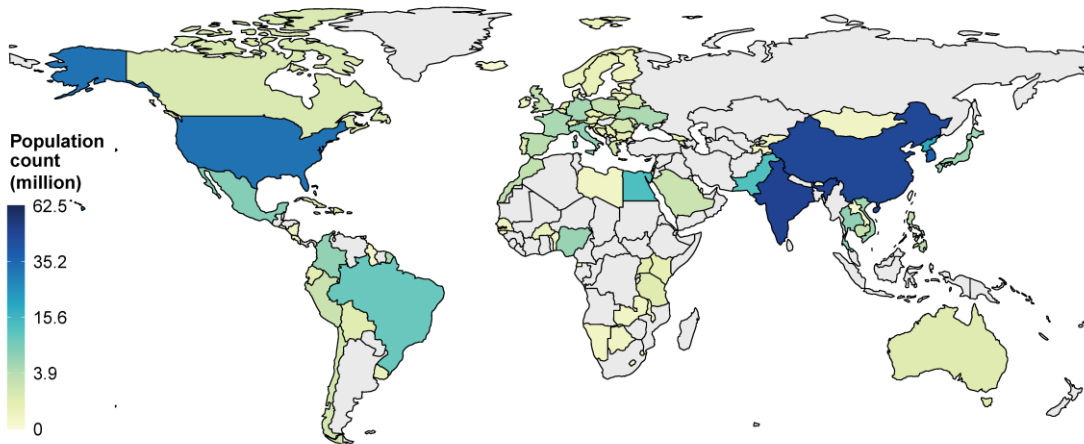

**C. Target population to maintain normal living supplies**

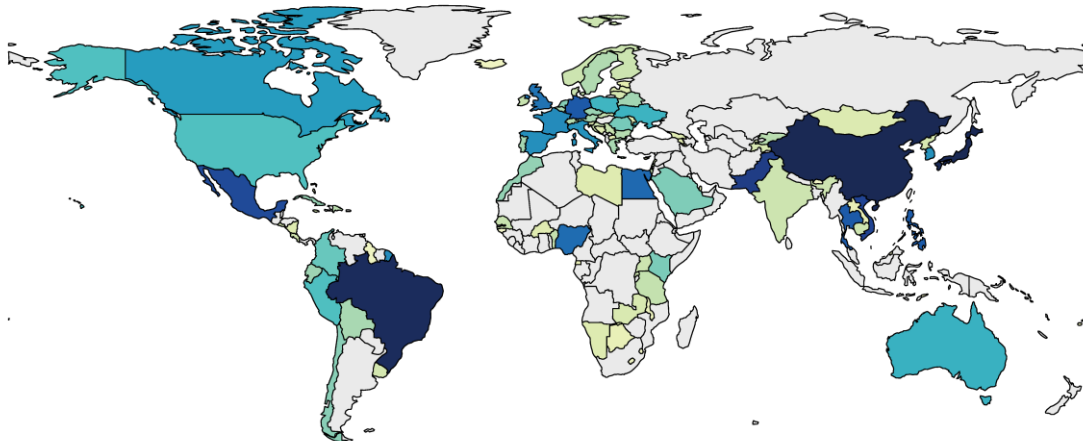

**Figure. S8. The size of target population to reduce severe COVID-19 disease, to reduce symptomatic infections and/or to stop virus transmission in 104 countries with data on each target population from official statistics.**

Note that the grey color refers to there is no data available on each target population.



**A. People aged  $\geq 60$  years with at least one underlying condition**

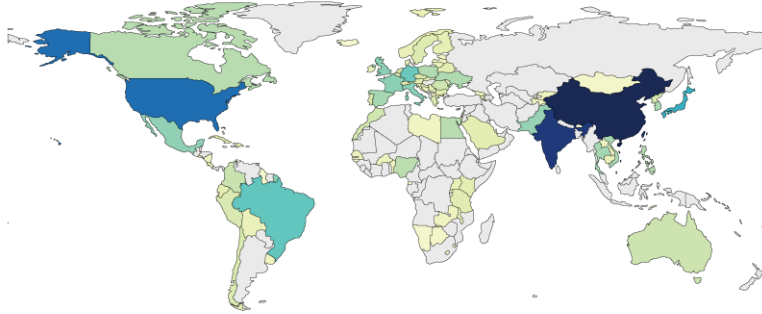

**B. People aged  $\geq 80$  years without any underlying conditions**

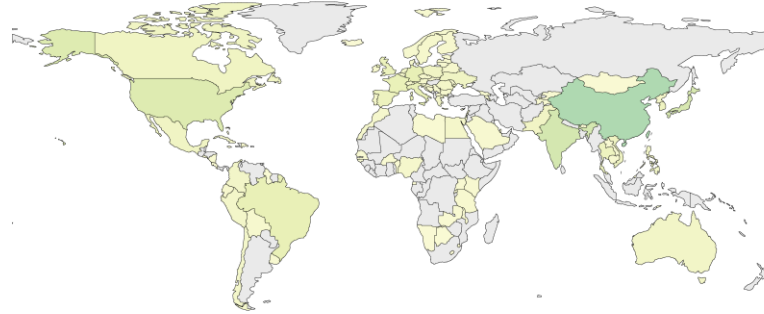

**C. People aged 60-79 years without any underlying conditions**

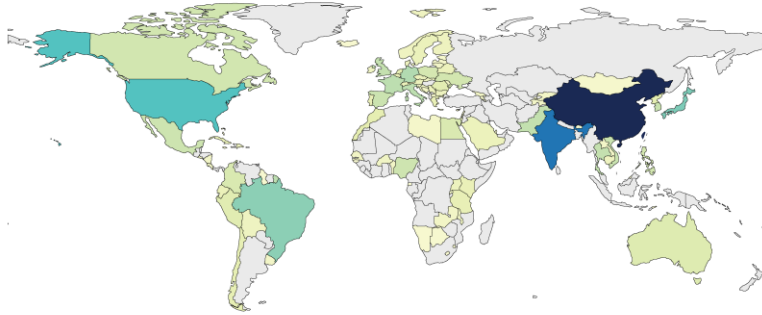

**D. People aged 20-59 years with at least one underlying condition**

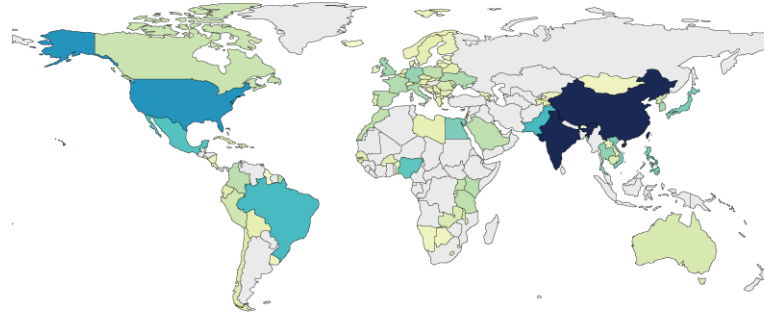

**E. Pregnant women**

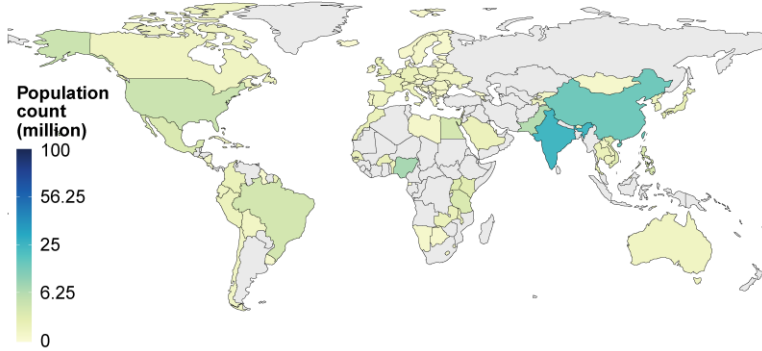

**F. Healthy adults (20-59 years)**

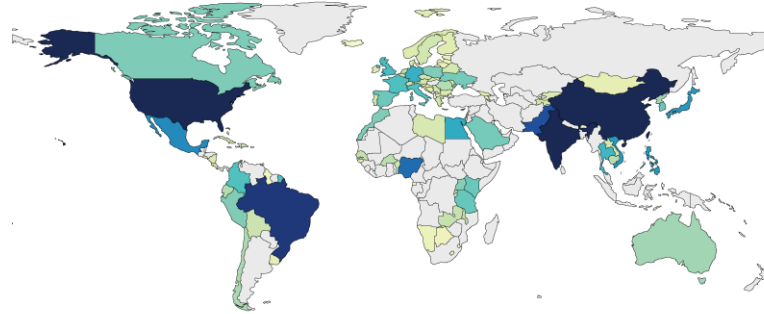

## References

1. Adebisi YA, Alaran AJ, Bolarinwa OA, Akande-Sholabi W, Lucero-Prisno DE. When it is available, will we take it? Public perception of hypothetical COVID-19 vaccine in Nigeria. medRxiv. 2020:2020.09.24.20200436.
2. Reuben RC, Danladi MMA, Saleh DA, Ejembi PE. Knowledge, Attitudes and Practices Towards COVID-19: An Epidemiological Survey in North-Central Nigeria. Journal of community health. 2020:1-14.
3. Lazarus JV, Ratzan SC, Palayew A, Gostin LO, Larson HJ, Rabin K, et al. A global survey of potential acceptance of a COVID-19 vaccine. Nature medicine. 2020:1-4.
4. M KN, L KN, G NM, DB BN, J MM, C LL, et al. Acceptability of Vaccination Against COVID-19 Among Healthcare Workers in the Democratic Republic of the Congo. medRxiv. 2020.
5. Mbiya BM, Djeugoue SL, Kanda EL, Mbuyi DK, Malundu TB, Mushiya RC, et al. Coronavirus-19 in the Democratic Republic of Congo: Public views, attitudes, and beliefs in an unaffected area: the case of the city of Mbuji-Mayi. medRxiv. 2020.
6. Pogue K, Jensen JL, Stancil CK, Ferguson DG, Hughes SJ, Mello EJ, et al. Influences on Attitudes Regarding Potential COVID-19 Vaccination in the United States. medRxiv. 2020.
7. Malik AA, McFadden SM, Elharake J, Omer SB. Determinants of COVID-19 vaccine acceptance in the US. EClinicalMedicine. 2020;26:100495.
8. Fisher KA, Bloomstone SJ, Walder J, Crawford S, Fouayzi H, Mazor KM. Attitudes Toward a Potential SARS-CoV-2 Vaccine: A Survey of U.S. Adults. Annals of internal medicine. 2020.
9. Reiter PL, Pennell ML, Katz ML. Acceptability of a COVID-19 vaccine among adults in the United States: How many people would get vaccinated? Vaccine. 2020;38(42):6500-7.
10. Underschultz et al. What drives resistance to public health measures in Canada's COVID-19 pandemic? A rapid assessment of knowledge, attitudes, and practices. medRxiv. 2020.
11. Graffigna G, Palamenghi L, Boccia S, Barelo S. Relationship between Citizens' Health Engagement and Intention to Take the COVID-19 Vaccine in Italy: A Mediation Analysis. Vaccines. 2020;8(4).

12. Williams L, Gallant AJ, Rasmussen S, Brown Nicholls LA, Cogan N, Deakin K, et al. Towards intervention development to increase the uptake of COVID-19 vaccination among those at high risk: Outlining evidence-based and theoretically informed future intervention content. *British journal of health psychology*. 2020;25(4):1039-54.
13. Feleszko et al. Flattening the curve of COVID-19 vaccine rejection—a global overview. *medRxiv*. 2020.
14. Bell SL, Clarke R, Mounier-Jack S, Walker JL, Paterson P. Parents' and guardians' views on the acceptability of a future Covid-19 vaccine: a multi-methods study in England. *medRxiv*. 2020:2020.09.16.20188227.
15. Barello S, Nania T, Dellafiore F, Graffigna G, Caruso R. 'Vaccine hesitancy' among university students in Italy during the COVID-19 pandemic. *European journal of epidemiology*. 2020;35(8):781-3.
16. Sherman SM, Smith LE, Sim J, Amlôt R, Cutts M, Dasch H, et al. COVID-19 vaccination intention in the UK: Results from the COVID-19 Vaccination Acceptability Study (CoVAccS), a nationally representative cross-sectional survey. *medRxiv*. 2020:2020.08.13.20174045.
17. Blanchard-Rohner G, Caprettini B, Rohner D, Voth H-J. Impact of COVID-19 and health system performance on vaccination hesitancy: Evidence from a two-leg representative survey in the UK. *medRxiv*. 2020.
18. Cristea V, Dub T, Luomala O, Sivelä J. COVID-19 behavioural insights study: Preliminary findings from Finland, April-May, 2020. *medRxiv*. 2020:2020.10.11.20210724.
19. Detoc M, Bruel S, Frappe P, Tardy B, Botelho-Nevers E, Gagneux-Brunon A. Intention to participate in a COVID-19 vaccine clinical trial and to get vaccinated against COVID-19 in France during the pandemic. *Vaccine*. 2020;38(45):7002-6.
20. Ward JK, Alleaume C, Peretti-Watel P. The French public's attitudes to a future COVID-19 vaccine: The politicization of a public health issue. *Social science & medicine (1982)*. 2020;265:113414.
21. Padhi BK, A. Almohaithef M. Determinants of COVID-19 vaccine acceptance in Saudi Arabia: a web-based national survey. *medRxiv*. 2020:2020.05.27.20114413.

22. Abdelhafiz AS, Mohammed Z, Ibrahim ME, Ziady HH, Alorabi M, Ayyad M, et al. Knowledge, Perceptions, and Attitude of Egyptians Towards the Novel Coronavirus Disease (COVID-19). *Journal of community health*. 2020;45(5):881-90.
23. Alabed AAA, Elengoe A, Anandan ES, Almahdi AY. Recent perspectives and awareness on transmission, clinical manifestation, quarantine measures, prevention and treatment of COVID-19 among people living in Malaysia in 2020. *Zeitschrift fur Gesundheitswissenschaften = Journal of public health*. 2020:1-10.
24. Fu C, Wei Z, Pei S, Li S, Sun X, Liu P. Acceptance and preference for COVID-19 vaccination in health-care workers (HCWs). *medRxiv*. 2020:2020.04.09.20060103.
25. Wang K, Wong ELY, Ho KF, Cheung AWL, Chan EYY, Yeoh EK, et al. Intention of nurses to accept coronavirus disease 2019 vaccination and change of intention to accept seasonal influenza vaccination during the coronavirus disease 2019 pandemic: A cross-sectional survey. *Vaccine*. 2020;38(45):7049-56.
26. Kwok KO, Li KK, Wei WI, Tang KH, Wong SYS, Lee SS. Are we ready when COVID-19 vaccine is available? Study on nurses' vaccine hesitancy in Hong Kong. *medRxiv*. 2020:2020.07.17.20156026.
27. Seale H, Heywood AE, Leask J, Sheel M, Durrheim DN, Bolsewicz K, et al. Examining Australian public perceptions and behaviors towards a future COVID-19 vaccine. *medRxiv*. 2020:2020.09.29.20204396.
28. Faasse K, Newby JM. Public perceptions of COVID-19 in Australia: perceived risk, knowledge, health-protective behaviours, and vaccine intentions. *medRxiv*. 2020:2020.04.25.20079996.
29. Wong LP, Alias H, Wong PF, Lee HY, AbuBakar S. The use of the health belief model to assess predictors of intent to receive the COVID-19 vaccine and willingness to pay. *Human vaccines & immunotherapeutics*. 2020;16(9):2204-14.
30. Wang J, Jing R, Lai X, Zhang H, Lyu Y, Knoll MD, et al. Acceptance of COVID-19 Vaccination during the COVID-19 Pandemic in China. *Vaccines*. 2020;8(3).
